1 **Cancer Stemness Online: A resource for investigating cancer stemness and associations**  
2 **with immune response**

3 Weiwei Zhou<sup>1,#</sup>, Minghai Su<sup>1,#</sup>, Tiantongfei Jiang<sup>1,#</sup>, Yunjin Xie<sup>1</sup>, Jingyi Shi<sup>1</sup>, Yingying Ma<sup>1</sup>,  
4 Kang Xu<sup>1</sup>, Gang Xu<sup>1</sup>, Yongsheng Li<sup>2,\*</sup> and Juan Xu<sup>1,\*</sup>

5 <sup>1</sup>College of Bioinformatics Science and Technology, Harbin Medical University, Harbin  
6 150081, China.

7 <sup>2</sup>School of Interdisciplinary Medicine and Engineering, Harbin Medical University, Harbin  
8 150081, China.

9 <sup>#</sup>These authors contributed equally to this work.

10 **\*Corresponding authors:**

11 Yongsheng Li, Email: [liyongsheng@ems.hrbmu.edu.cn](mailto:liyongsheng@ems.hrbmu.edu.cn)

12 Juan Xu, Email: [xujuanbiocc@ems.hrbmu.edu.cn](mailto:xujuanbiocc@ems.hrbmu.edu.cn)

13

14 **Running title:** *Zhou W et al/* Database for cancer stemness and immunotherapy

15 Total number of words: 2997

16 Total number of figures: 4

17 Total number of tables: 0

18 Total number of supplementary figures: 1

19 Total number of supplementary tables: 1

20 Total number of references: 47

21 Total number of characters in article title: 93

22 Total number of characters in running title: 41

23 Total number of keywords: 4

24 Total number of words in abstract: 209

25 **Abstract**

26 Cancer progression involves the gradual loss of a differentiated phenotype and acquisition of  
27 progenitor and stem-cell-like features, which are potential culprit in immunotherapy  
28 resistance. Although the state-of-art predictive computational methods have facilitated  
29 predicting the cancer stemness, currently there is no efficient resource that can meet various  
30 requirements of usage. Here, we presented the Cancer Stemness Online, an integrated  
31 resource for efficiently scoring cancer stemness potential at bulk and single-cell level. The  
32 resource integrates 8 robust predictive algorithms as well as 27 signature gene sets associated  
33 with cancer stemness for predicting the stemness scores. Downstream analyses were  
34 performed from five different aspects, including identifying the signature genes of cancer  
35 stemness, exploring the association with cancer hallmarks, cellular states, immune response  
36 and communication with immune cells, investigating the contributions for patient survival  
37 and the robustness analysis of cancer stemness among different methods. Moreover, the pre-  
38 calculated cancer stemness atlas for more than 40 cancer types can be accessed by users. Both  
39 the tables and diverse visualization for the analytical results are available for download.  
40 Together, Cancer Stemness Online is a powerful resource for scoring cancer stemness and  
41 going deeper and wider in the downstream functional interpretation, including immune  
42 response as well as cancer hallmark. Cancer Stemness Online is freely accessible at  
43 <http://bio-bigdata.hrbmu.edu.cn/CancerStemnessOnline>.

44 **Keywords:**

45 Cancer stemness, cancer stem cell, single-cell RNA-seq, immunology.

46

## 47 **Introduction**

48 Although numerous therapeutic modalities have been developed to treat cancer, such as  
49 surgery, radiation, chemotherapy and immunotherapy, the risk of cancer recurrence remains  
50 high [1]. Cancer progression involves the gradual loss of a differentiated phenotype and  
51 acquisition of progenitor and stem-cell-like features [2, 3]. The existence of cancer stem cells  
52 (CSCs) has been reported in various cancer types [4]. Cancer stemness has also been reported  
53 to be the potential culprit in immunotherapy resistance [5, 6]. A convenient platform  
54 providing the markers of cancer stemness and stemness index of patients or cancer cells is  
55 critical to understand the potential molecular mechanism and develop useful therapy.

56 Recently, the state-of-art predictive computational methods facilitate to assess the degree  
57 of cancer stemness. The majority of methods mainly based on bulk or single-cell  
58 transcriptomes to evaluate the stemness of patients or cancer cells. Briefly, these methods can  
59 be classified into unsupervised and supervised methods. For example, the commonly used  
60 method was single-sample gene set enrichment analysis (ssGSEA) [7], which estimated the  
61 stemness score based on the expressions of collected stemness-related gene signatures.  
62 Moreover, CytoTRACE was recently developed to predict the differentiation and  
63 developmental potential of single cell by assessing the number of detectably expressed genes  
64 per cell [8]. Other tools, such as SLICE [9] and SCENT [10] allow researchers to quantify  
65 stemness by entropy analysis. StemID [11] assesses stemness of cell types within a  
66 population by utilizing tree topology and transcriptome composition.

67 On the other hand, numerous supervised methods were also developed to estimate the  
68 stemness. mRNasi is a widely used transcriptome stemness index to evaluate the stemness  
69 based on the one-class logistic regression machine learning algorithm [12, 13].  
70 StemnessIndex provides an absolute index to evaluate stemness by comparing the relative  
71 expression orderings of the stem cell samples and the normal adult samples from different  
72 tissues [13]. In addition, StemSC is a stemness index for single cell [14], which represents the  
73 percentage of gene pairs with the same relative expression orderings as the reference of  
74 embryonic stem cell samples. All these unsupervised and supervised methods provided  
75 valuable tools for estimating the stemness for patients or single cells. However, they were  
76 scattered across different literature and are difficult to use for researchers with no  
77 programming experience.

78 Some webservers or databases have been developed to depict cell stemness or collect stem  
79 cell-related data. However, the majority of these resources only focus on stem gene sets,

80 without providing stemness of samples from public data directly. For example, SISTEMA  
81 [15] collected a large number of human stem cell transcriptome data to display the expression  
82 of stem genes under different cell lines, cell types and pathological conditions. StemMapper  
83 [16] collected transcriptome data sets of various stem cells. Currently there is no efficient  
84 database that can meet various requirements of users.

85 Therefore, we developed the Cancer Stemness Online ([http://bio-](http://bio-bigdata.hrbmu.edu.cn/CancerStemnessOnline/)  
86 [bigdata.hrbmu.edu.cn/CancerStemnessOnline/](http://bio-bigdata.hrbmu.edu.cn/CancerStemnessOnline/)), which is a resource providing the cancer  
87 stemness score (CSscore), functional analysis and visualization. To assess the CSscore for  
88 bulk or single-cell RNA-seq (scRNA-seq) data, Cancer Stemness Online integrated 5  
89 unsupervised and three supervised methods, which evaluated the differentiation level based  
90 on transcriptional complexity or similarity to the reference profiles of stem cells. Basic  
91 statistical analysis and additional five advanced analyses modules were provided. Cancer  
92 Stemness Online is an online platform that does not require registration. It allows users to  
93 upload their data for analysis. It provides multiple visualizations of the results for better  
94 understanding the stemness. All charts and tables are available for download. Together,  
95 Cancer Stemness Online is a powerful resource for estimating cancer stemness and going  
96 deeper and wider in the downstream functional interpretation, including immune response as  
97 well as cancer hallmarks.

## 98 **Materials and methods**

### 99 **Collection of cancer stemness gene sets**

100 For collecting the cancer stemness-related gene sets, we queried the studies published in  
101 recent years in PubMed with “cancer stem cell” or “stemness” as keywords. In total, we  
102 manually curated 2860 articles and recorded 27 canonical cancer stemness gene sets (Table  
103 S1). The number of genes ranged from 5 to 1007 in these gene sets. All gene names have  
104 mapped to classical gene symbols.

### 105 **Quality control**

106 For scRNA-seq data, we removed cells with less than 200 total count and genes expressed in  
107 less than 3 cells. Cells with more than 5% mitochondrial gene counts were filtered. For bulk  
108 RNA-seq data, samples with no expressed gene were removed. To address the effects of  
109 noise and batching of the data, users can use several available tools, such as Seurat [17] and  
110 Harmony [18], before uploading it to Cancer Stemness Online.

## 111 **Calculation of cancer stemness scores**

112 Cancer Stemness Online collected 8 computational methods to evaluate the stemness  
113 potential based on multiple principles. These methods were further categorized into  
114 ‘unsupervised’ and ‘supervised’ according to the reference of cancer stem cells. On the other  
115 hand, mRNAsi [12], StemnessIndex [13] and GSVA [19] were applied to bulk RNA-seq data.  
116 CytoTRACE [20], SLICE [21], SCENT [10], StemSC [14] and GSVA [19] were used for  
117 scRNA-seq data. To improve the comparability of results, we carried out 0-1 normalization to  
118 all CSscores. In addition to the above methods, the CSscores of scRNA-seq data uploaded by  
119 users can also be calculated based on StemID [11].

## 120 **Single-cell trajectory analysis**

121 To analyze the cell pseudotime in scRNA-seq data, we performed ‘Monocle 2’ [22], which  
122 uses reversed graph embedding to describe multiple fate decisions in a fully unsupervised  
123 manner.

## 124 **Identification of stemness-related signature**

125 To assess the relevance between CSscores and gene expressions, we calculated the spearman  
126 correlation coefficient (SCC). The genes with false discovery rate (FDR) < 0.05 and SCC >  
127 0.5 (default) were identified as cancer stemness-related gene signatures.

## 128 **Functional correlations**

129 To investigate the functions of cell types, we first calculated the single sample gene set  
130 enrichment analysis (ssGSEA) score for each cell [19]. The cellular states, immune signatures  
131 and cancer hallmarks were considered. In addition, we calculated the spearman correlation  
132 coefficient between the CSscores and ssGSEA scores. In bulk data, we calculated the  
133 infiltration of immune cells in the sample by ‘cibersort’ function [23]. The spearman  
134 correlation coefficients between the CSscores and infiltrations of various immune cells were  
135 calculated respectively.

## 136 **Survival analysis**

137 The clinical information including overall survival and state of samples were uploaded by  
138 users. We applied cox proportional hazards regression model to assess the prognosis of all  
139 cancer stemness genes, based on their median expression. The K–M survival curves were

140 generated by the ‘survminer’ function with corresponding log-rank P values. For the genes  
141 with positive beta of ‘coxph’, we defined them as risky factors, and the negative ones were  
142 protective factors.

### 143 **Cell–cell communications**

144 To further explore the interactions between cancer stem cells and other cells, we identified  
145 the cell–cell communications by iTALK (<https://github.com/Coolgenome/iTALK>). The  
146 integrated ligand-receptor interactions were collected from CellchatDB [24], celltalkDB [25],  
147 ICELLNET [26], iTALK, Nichenet [27], singlecellsignalR [28] and one recent study [29].  
148 The union sets of ligand-receptor pairs were integrated in Cancer Stemness Online.

### 149 **Database implementation**

150 The frontend of Cancer Stemness Online was built with HTML5, JavaScript, and CSS, and it  
151 included the jQuery (v3.3.1), Datatable (1.10.25), ECharts (v5.5.1) and D3 (v7.6.1) plugins.  
152 The backend of Cancer Stemness Online was powered by eclipse (MARS.2) and was queried  
153 via the Java Server Pages with Apache Tomcat container (v6.0) as the middleware. All data  
154 in Cancer Stemness Online were stored and managed using eclipse (MARS.2) and it  
155 employed Java and R programs to perform online analyses. Cancer Stemness Online has been  
156 tested on several popular web browsers, including Google Chrome, Firefox, and Apple Safari.

## 157 **Results**

### 158 **Overall architecture of Cancer Stemness Online**

159 The purpose of Cancer Stemness Online is to facilitate the prediction of cancer stemness  
160 score (CSscore) of tumor cells or samples. The overall design of Cancer Stemness Online  
161 was summarized in **Figure 1**. The platform accepts different types of transcriptomes  
162 uploaded by users, such as the bulk RNA-seq and scRNA-seq data (Figure 1A). In addition,  
163 the users can also upload the clinical data of the patients. The inputted files can be prepared  
164 following the format description.

165 The platform integrated 8 robust computational algorithms to predict the CSscore for each  
166 patient or cell. These methods were classified into five unsupervised and three supervised  
167 methods (Figure 1B). To facilitate the selection of the methods, we provided practical  
168 guidance from two aspects: By Model Type and By Input Type. Next, the server executes the

169 prediction of CSscore with the selected method. The distribution of CSScores, clinical  
170 associations, cell trajectory and associations with genetic features will be returned in the  
171 results page (Figure 1C). In addition, the downstream module can identify the gene signatures  
172 associated with CSScores, cluster the cells based on expressions of gene signatures, survival  
173 analysis, and functional prediction and identify the cell-cell communications (Figure 1D).

174 Besides the interactive web interface, Cancer Stemness Online also provided flexible ways  
175 to access the annotations cancer stemness scores for available cancer transcriptomes projects  
176 (Figure 1E), such as TCGA, ICGC and single-cell transcriptomes from published studies. All  
177 the analysis results and visualization modules from the resource can be exported as high-  
178 quality images and downloaded for further analysis.

### 179 **User interface of Cancer Stemness Online**

180 Cancer Stemness Online is an open access online platform for predicting the cancer stemness  
181 score for cancer patients or cells. The web interface is freely available and no login is  
182 required. The main features of Cancer Stemness Online are the ‘CSscore’ and ‘DownStream’  
183 modules (**Figure 2**). The users can start predicting the CSScore from the ‘GET STARTED’  
184 button in the homepage or from the ‘CSscore’ module. The server allows users to predict the  
185 CSScore by selecting from the model type or input type (Figure 2A). In the By Model Type,  
186 five unsupervised and three supervised methods can be selected. In the By Input Type, three  
187 methods are suitable for bulk transcriptomes and 6 methods for single-cell transcriptomes.  
188 The transcriptomes and clinical information of samples can be uploaded and the users can  
189 also leave the email information for further retrieving the results from email (Figure 2B).

190 The results page first returns the job information, such as the Job ID, algorithm and  
191 expression profiles (Figure 2C). The predicted CSScores and associations with clinical  
192 features (i.e., grade, tumor mutation burden and treatment) will be provided and visualized in  
193 the database (Figure 2D). We also provided a ‘Multiple method’ module in the ‘CSscore’  
194 page, which allows users to select multiple methods and obtained the integrated rank of  
195 samples or cells based on the robust rank aggregation (RRA) algorithm (Figure 2E-G).  
196 Moreover, the users can perform additional downstream analyses from the ‘DownStream’  
197 module. The users can retrieve the predicted CSScores by inputting the Job ID (Figure 2H).  
198 Several parameters can be selected and additional clinical data is optionally uploaded. The  
199 new job information will be first provided (Figure 2I) and advanced analysis results will be

200 provided in tables or images (Figure 2J). For example, the genes associated with CSscores  
201 will be provided in table and the gene expressions are visualized by heat map. The functional  
202 pathways enriched by gene signatures are also provided in table and heat map formats. The  
203 clinical survival is performed to evaluate whether the CSscores are associated with survival  
204 (Figure 2J). Cell-cell communications and the correlations of CSscores predicted by different  
205 methods are also analysed automatically in Cancer Stemness Online. In addition, the  
206 predicted CSscores of TCGA, ICGC and single-cell transcriptomes from published studies  
207 can be accessed from the 'Data' module (Figure 2K). Users can find additional information  
208 from the 'Help' page.

### 209 **Case study 1: Cancer stemness analysis of bulk transcriptomes**

210 To illustrate the various functionalities of Cancer Stemness Online, we first analysed the bulk  
211 transcriptomes of hepatocellular carcinoma (HCC) from The Cancer Genome Atlas (TCGA)  
212 [30]. We predicted the CSscores for each patient based on the StemnessIndex algorithm  
213 (**Figure 3**). We found that the majority of the patients were with low CSscores (Figure 3A),  
214 although several patients with high cancer stemness. The server also evaluated the  
215 associations between CSscores and clinical features. Cancer patients in high grade were with  
216 significantly higher CSscores in HCC (Figure 3B). The CSscores of cancer patients were  
217 positively correlated with the number of mutations (Figure 3C,  $R = 0.14$ ,  $p = 0.011$ ), which  
218 was consistent with previous studies [12, 13, 31]. These results suggested that the CSscore  
219 was associated with clinical and genetic features in HCC.

220 Next, we performed advanced analyses based on the 'DownStream' module of Cancer  
221 Stemness Online. We identified numerous of genes whose expressions were associated with  
222 CSscores in HCC (Figure 3D), including BIRC5 [32], CDC20 [33], PTTG1 [34], and KIF2C  
223 [35]. Functional analyses revealed that the 'DNA repair' and 'MYC targets V1' pathways,  
224 infiltrations of several immune cells were significantly associated with CSscores of cancer  
225 patients (Figure 3D). In particular, cancer patients with high CSscores exhibited significantly  
226 higher enrichment scores of 'DNA repair' (Figure 3E,  $p < 0.001$ ) and 'MYC targets V1'  
227 (Figure 3F,  $p < 0.001$ ). In addition, there were significantly higher infiltrations of NK cells in  
228 cancer patients with low CSscores (Figure 3G,  $p < 0.01$ ). We next evaluated the survival rates  
229 of patients with different CSscores and found that patients with higher stemness exhibited  
230 significantly poor survival in HCC (Figure 3H,  $p = 0.00034$ , log-rank test). These results  
231 suggested that Cancer Stemness Online not only predicted the cancer stemness accurately,



232 but also provided novel insights into the functional pathways and immune regulation in  
233 cancer.

## 234 **Case study 2: Cancer stemness analysis of single-cell transcriptomes**

235 The development of single-cell sequencing in cancer research has revolutionized our  
236 understanding of the biological characteristics within different cancer types [36]. We next  
237 analysed the cancer stemness of single-cell transcriptome based on the Cancer Stemness  
238 Online server. We obtained the single-cell transcriptome of melanoma from one previous  
239 study [37], including 7186 cells from 31 patients. We estimated the CSscores for each cancer  
240 cell based on CytoTRACE algorithm embedded in the server (**Figure 4**). We found that large  
241 numbers of cells were with higher CSscores in melanoma (Figure 4A). In addition, the  
242 pseudotime of cells was estimated by monocle and we found that cells with low pseudotime  
243 exhibited significantly higher CSscores (Figure 4B). Immune checkpoint inhibitors (ICI)  
244 produce durable responses in some melanoma patients. We found that cells from post  
245 treatment were with significantly higher CSscores than those of treatment naive (Figure 4C,  $p$   
246  $< 2.2E-16$ ), suggesting potential immunotherapy resistance [31].

247 In the 'DownStream' module, we first identified numerous genes whose expressions were  
248 correlated with CSscores (Figure 4D). We found that the expressions of genes can effectively  
249 distinguish the cells with higher or lower CSscores (Figure 4E). For example, BIRC5 was  
250 highly expressed in cells with higher CSscores (Figure 4F). Functional pathway and immune  
251 regulation analyses revealed that cancer cells with high CSscores exhibited significantly  
252 enrichment of DNA repair (Figure 4G,  $p < 0.001$ ) and proliferation (Figure 4H,  $p < 0.001$ ).  
253 These results were consistent with previous observations [31, 38, 39]. We also investigated  
254 the cell-cell communications based on the ligand-receptor interactions. We found that cancer  
255 stem cells communicated with other immune cells via various ligand-receptor interactions  
256 (Figure 4I). In particular, interaction between ADAM10-CD44 helps communication between  
257 cancer stem cells and T cells (Figure 4I) [40, 41]. All the analysis results visualized on the  
258 web interface were available for download.

## 259 **Discussion**

260 Cancer Stemness Online is a useful resource for scoring cancer stemness and associations  
261 with immune response, which integrated 8 robust predictive algorithms. The platform  
262 supports different types of input transcriptomes and the output of Cancer Stemness Online

263 provided the tables and images for visualization of the CSscores and associations with  
264 clinical features. These results benefit the non-computational biologists to explore the cancer  
265 stemness. Cancer Stemness Online encompasses not only diverse functionalities, but also  
266 user-friendly operations and visually intuitive interfaces. In addition, recent studies have  
267 shown that a high stemness profile in cancer is associated with an inferior immunogenic  
268 response [42]. Different types of immune cells can be recruited from tumor-associated stem  
269 cells [43-45]. Thus, the ‘DownStream’ module in Cancer Stemness Online provided  
270 advanced analysis for investigating the functional pathway and immune regulation in the  
271 context of cancer stemness. Overall, Cancer Stemness Online is a user-friendly platform to  
272 predict the cancer stemness and explore the functional consequence in cancer.

273 We provided diverse methods to predict the stemness scores for individual sample or cell.  
274 To further assist the users selecting the appropriate methods, we first compared the  
275 performances of different methods based on both bulk and single cell methods from recent  
276 researches [46, 47]. We found that the method ‘StemnessIndex’ might be the most effective  
277 for bulk transcriptomes, while ‘CytoTRACE’ might be the most effective one for single-cell  
278 transcriptomes (Figure S1). In addition, we have provided a ‘Multiple method’ section  
279 module in the ‘CSscore’ page. This module allows users to select multiple methods to predict  
280 the stemness scores, and we next obtained the integrated rank of samples or cells based on the  
281 robust rank aggregation (RRA) algorithm. The runtimes and correlations between different  
282 methods and RRA were provided. Thus, users can integrate the results from multiple methods  
283 for downstream analysis.

284 Nevertheless, there are still rooms to improve in the future. Here are a few areas that we  
285 plan to expand in the future version of Cancer Stemness Online. (1) improve the coverage of  
286 computational methods and cancer stemness gene sets. Currently, 8 computational methods  
287 were integrated in Cancer Stemness Online. We plan to cover newly developed algorithms  
288 and cancer stemness gene sets in the near future. (2) expand to cover additional genomes and  
289 transcriptomes. The server can only predict the CSscores for human transcriptomes, which  
290 should consider in the future working for a wider species. With the development of high  
291 throughput sequencing technology, additional cancer transcriptomes will be added in the  
292 cancer stemness atlas. (3) include additional annotations. We plan to add more functional  
293 annotations, such as more immune cells, more pathways and more immunotherapy  
294 information.

295 Overall, Cancer Stemness Online is a powerful resource for reducing the barrier to analyse  
296 the huge transcriptome data that biomedical researchers face and facilitating the identification  
297 of association with cancer immunotherapy response for further mechanistic and functional  
298 insights.

### 299 **Data availability**

300 The web server of Cancer Stemness Online is freely accessible at [http://bio-](http://bio-bigdata.hrbmu.edu.cn/CancerStemnessOnline)  
301 [bigdata.hrbmu.edu.cn/CancerStemnessOnline](http://bio-bigdata.hrbmu.edu.cn/CancerStemnessOnline)

### 302 **Code availability**

303 Code used to perform analyses in this manuscript is available at  
304 <https://github.com/ComputationalEpigeneticsLab/CancerStemnessOnline>.

### 305 **CRedit author statement**

306 **Weiwei Zhou:** Conceptualization, Software, Formal analysis, Visualization, Methodology,  
307 Writing–original draft. **Minghai Su:** Conceptualization, Software, Formal analysis,  
308 Visualization, Methodology, Writing–original draft. **Tiantongfei Jiang:** Conceptualization,  
309 Software, Formal analysis, Visualization, Methodology, Writing–original draft. **Yunjin Xie:**  
310 Conceptualization, Methodology, Writing–review & editing. **Jingyi Shi:** Software,  
311 Methodology, Writing–review & editing. **Yingying Ma:** Conceptualization, Software,  
312 Methodology, Writing–review & editing. **Kang Xu:** Conceptualization, Software,  
313 Methodology, Writing–review & editing. **Gang Xu:** Conceptualization, Software, Writing–  
314 review & editing. **Yongsheng Li:** Conceptualization, Formal analysis, Supervision,  
315 Methodology, Project administration, Writing– review & editing. **Juan Xu:**  
316 Conceptualization, Formal analysis, Supervision, Methodology, Project administration,  
317 Writing– review & editing.

### 318 **Competing interests**

319 The authors declare that they have no competing interests.

### 320 **Acknowledgments**

321 This work was supported by the National Natural Science Foundation of China (32322020,  
322 32170676, 32060152); Natural Science Foundation of Heilongjiang Province (Key Program)  
323 (ZD2023C007) and Heilongjiang Touyan Innovation Team Program.

#### 324 **ORCID**

325 0000-0003-1641-8965 (Weiwei Zhou)

326 0000-0001-5135-3103 (Minghai Su)

327 0009-0008-5376-7922 (Tiantongfei Jiang)

328 0000-0002-7361-2310 (Yunjin Xie)

329 0009-0004-0214-0311 (Jingyi Shi)

330 0000-0002-6245-2200 (Yingying Ma)

331 0000-0003-4543-0998 (Kang Xu)

332 0000-0003-4381-7232 (Gang Xu)

333 0000-0003-1914-0727 (Yongsheng Li)

334 0000-0002-3709-4165 (Juan Xu)

#### 335 **References**

336 [1] Gonzalez-Fierro A, Duenas-Gonzalez A. Drug repurposing for cancer therapy, easier said than  
337 done. *Semin Cancer Biol* 2021;68:123-31.

338 [2] Battle E, Clevers H. Cancer stem cells revisited. *Nat Med* 2017;23:1124-34.

339 [3] Huang T, Song X, Xu D, Tiek D, Goenka A, Wu B, et al. Stem cell programs in cancer initiation,  
340 progression, and therapy resistance. *Theranostics* 2020;10:8721-43.

341 [4] Nio K, Yamashita T, Kaneko S. The evolving concept of liver cancer stem cells. *Mol Cancer*  
342 2017;16:4.

343 [5] Yang L, Shi P, Zhao G, Xu J, Peng W, Zhang J, et al. Targeting cancer stem cell pathways for  
344 cancer therapy. *Signal Transduct Target Ther* 2020;5:8.

345 [6] Zhang D, Tang DG, Rycaj K. Cancer stem cells: Regulation programs, immunological properties  
346 and immunotherapy. *Semin Cancer Biol* 2018;52:94-106.

347 [7] Rooney MS, Shukla SA, Wu CJ, Getz G, Hacohen N. Molecular and genetic properties of tumors  
348 associated with local immune cytolytic activity. *Cell* 2015;160:48-61.

349 [8] Foster DS, Januszyn M, Delitto D, Yost KE, Griffin M, Guo J, et al. Multiomic analysis reveals  
350 conservation of cancer-associated fibroblast phenotypes across species and tissue of origin. *Cancer*  
351 *Cell* 2022;40:1392-406 e7.

352 [9] Panina Y, Karagiannis P, Kurtz A, Stacey GN, Fujibuchi W. Human Cell Atlas and cell-type  
353 authentication for regenerative medicine. *Exp Mol Med* 2020;52:1443-51.

354 [10] Teschendorff AE, Enver T. Single-cell entropy for accurate estimation of differentiation potency  
355 from a cell's transcriptome. *Nat Commun* 2017;8:15599.

356 [11] Grun D, Muraro MJ, Boisset JC, Wiebrands K, Lyubimova A, Dharmadhikari G, et al. De Novo  
357 Prediction of Stem Cell Identity using Single-Cell Transcriptome Data. *Cell Stem Cell* 2016;19:266-  
358 77.

- 359 [12] Malta TM, Sokolov A, Gentles AJ, Burzykowski T, Poisson L, Weinstein JN, et al. Machine  
360 Learning Identifies Stemness Features Associated with Oncogenic Dedifferentiation. *Cell*  
361 2018;173:338-54 e15.
- 362 [13] Zheng H, Song K, Fu Y, You T, Yang J, Guo W, et al. An absolute human stemness index  
363 associated with oncogenic dedifferentiation. *Brief Bioinform* 2021;22:2151-60.
- 364 [14] Zheng H, Xie J, Song K, Yang J, Xiao H, Zhang J, et al. StemSC: a cross-dataset human  
365 stemness index for single-cell samples. *Stem Cell Res Ther* 2022;13:115.
- 366 [15] Jarrige M, Polveche H, Carteron A, Janczarski S, Peschanski M, Auboeuf D, et al. SISTEMA: A  
367 large and standardized collection of transcriptome data sets for human pluripotent stem cell research.  
368 *iScience* 2021;24:102767.
- 369 [16] Pinto JP, Machado RSR, Magno R, Oliveira DV, Machado S, Andrade RP, et al. StemMapper: a  
370 curated gene expression database for stem cell lineage analysis. *Nucleic Acids Res* 2018;46:D788-  
371 D93.
- 372 [17] Butler A, Hoffman P, Smibert P, Papalexi E, Satija R. Integrating single-cell transcriptomic data  
373 across different conditions, technologies, and species. *Nat Biotechnol* 2018;36:411-20.
- 374 [18] Korsunsky I, Millard N, Fan J, Slowikowski K, Zhang F, Wei K, et al. Fast, sensitive and  
375 accurate integration of single-cell data with Harmony. *Nat Methods* 2019;16:1289-96.
- 376 [19] Hanzelmann S, Castelo R, Guinney J. GSVA: gene set variation analysis for microarray and  
377 RNA-seq data. *BMC Bioinformatics* 2013;14:7.
- 378 [20] Gulati GS, Sikandar SS, Wesche DJ, Manjunath A, Bharadwaj A, Berger MJ, et al. Single-cell  
379 transcriptional diversity is a hallmark of developmental potential. *Science* 2020;367:405-11.
- 380 [21] Guo M, Bao EL, Wagner M, Whitsett JA, Xu Y. SLICE: determining cell differentiation and  
381 lineage based on single cell entropy. *Nucleic Acids Res* 2017;45:e54.
- 382 [22] Qiu X, Mao Q, Tang Y, Wang L, Chawla R, Pliner HA, et al. Reversed graph embedding  
383 resolves complex single-cell trajectories. *Nat Methods* 2017;14:979-82.
- 384 [23] Newman AM, Liu CL, Green MR, Gentles AJ, Feng W, Xu Y, et al. Robust enumeration of cell  
385 subsets from tissue expression profiles. *Nat Methods* 2015;12:453-7.
- 386 [24] Jin S, Guerrero-Juarez CF, Zhang L, Chang I, Ramos R, Kuan CH, et al. Inference and analysis  
387 of cell-cell communication using CellChat. *Nat Commun* 2021;12:1088.
- 388 [25] Shao X, Liao J, Li C, Lu X, Cheng J, Fan X. CellTalkDB: a manually curated database of ligand-  
389 receptor interactions in humans and mice. *Brief Bioinform* 2021;22.
- 390 [26] Noel F, Massenet-Regad L, Carmi-Levy I, Cappuccio A, Grandclaude M, Trichot C, et al.  
391 Dissection of intercellular communication using the transcriptome-based framework ICELLNET. *Nat*  
392 *Commun* 2021;12:1089.
- 393 [27] Browaeys R, Saelens W, Saeys Y. NicheNet: modeling intercellular communication by linking  
394 ligands to target genes. *Nat Methods* 2020;17:159-62.
- 395 [28] Cabello-Aguilar S, Alame M, Kon-Sun-Tack F, Fau C, Lacroix M, Colinge J. SingleCellSignalR:  
396 inference of intercellular networks from single-cell transcriptomics. *Nucleic Acids Res* 2020;48:e55.
- 397 [29] Ramilowski JA, Goldberg T, Harshbarger J, Kloppmann E, Lizio M, Satagopam VP, et al. A  
398 draft network of ligand-receptor-mediated multicellular signalling in human. *Nat Commun*  
399 2015;6:7866.
- 400 [30] Cancer Genome Atlas Research N, Weinstein JN, Collisson EA, Mills GB, Shaw KR,  
401 Ozenberger BA, et al. The Cancer Genome Atlas Pan-Cancer analysis project. *Nat Genet*  
402 2013;45:1113-20.
- 403 [31] Zhang Z, Wang ZX, Chen YX, Wu HX, Yin L, Zhao Q, et al. Integrated analysis of single-cell  
404 and bulk RNA sequencing data reveals a pan-cancer stemness signature predicting immunotherapy  
405 response. *Genome Med* 2022;14:45.
- 406 [32] Shen S, Wang R, Qiu H, Li C, Wang J, Xue J, et al. Development of an Autophagy-Based and  
407 Stemness-Related Prognostic Model for Hepatocellular Carcinoma Using Bulk and Single-Cell  
408 RNA-Sequencing. *Front Cell Dev Biol* 2021;9:743910.
- 409 [33] Zhang Q, Huang H, Liu A, Li J, Liu C, Sun B, et al. Cell division cycle 20 (CDC20) drives  
410 prostate cancer progression via stabilization of beta-catenin in cancer stem-like cells. *EBioMedicine*  
411 2019;42:397-407.

- 412 [34] Yoon CH, Kim MJ, Lee H, Kim RK, Lim EJ, Yoo KC, et al. PTTG1 oncogene promotes tumor  
413 malignancy via epithelial to mesenchymal transition and expansion of cancer stem cell population. *J*  
414 *Biol Chem* 2012;287:19516-27.
- 415 [35] Wei R, Quan J, Li S, Liu H, Guan X, Jiang Z, et al. Integrative Analysis of Biomarkers Through  
416 Machine Learning Identifies Stemness Features in Colorectal Cancer. *Front Cell Dev Biol*  
417 2021;9:724860.
- 418 [36] Lei Y, Tang R, Xu J, Wang W, Zhang B, Liu J, et al. Applications of single-cell sequencing in  
419 cancer research: progress and perspectives. *J Hematol Oncol* 2021;14:91.
- 420 [37] Jerby-Arnon L, Shah P, Cuoco MS, Rodman C, Su MJ, Melms JC, et al. A Cancer Cell Program  
421 Promotes T Cell Exclusion and Resistance to Checkpoint Blockade. *Cell* 2018;175:984-97 e24.
- 422 [38] Casey SC, Tong L, Li Y, Do R, Walz S, Fitzgerald KN, et al. MYC regulates the antitumor  
423 immune response through CD47 and PD-L1. *Science* 2016;352:227-31.
- 424 [39] Reilly A, Philip Creamer J, Stewart S, Stolla MC, Wang Y, Du J, et al. Lamin B1 deletion in  
425 myeloid neoplasms causes nuclear anomaly and altered hematopoietic stem cell function. *Cell Stem*  
426 *Cell* 2022;29:577-92 e8.
- 427 [40] Bayik D, Lathia JD. Cancer stem cell-immune cell crosstalk in tumour progression. *Nat Rev*  
428 *Cancer* 2021;21:526-36.
- 429 [41] Becerril-Rico J, Alvarado-Ortiz E, Toledo-Guzman ME, Pelayo R, Ortiz-Sanchez E. The cross  
430 talk between gastric cancer stem cells and the immune microenvironment: a tumor-promoting factor.  
431 *Stem Cell Res Ther* 2021;12:498.
- 432 [42] Miranda A, Hamilton PT, Zhang AW, Pattnaik S, Becht E, Mezheyeuski A, et al. Cancer  
433 stemness, intratumoral heterogeneity, and immune response across cancers. *Proc Natl Acad Sci U S A*  
434 2019;116:9020-9.
- 435 [43] Raggi C, Correnti M, Sica A, Andersen JB, Cardinale V, Alvaro D, et al. Cholangiocarcinoma  
436 stem-like subset shapes tumor-initiating niche by educating associated macrophages. *J Hepatol*  
437 2017;66:102-15.
- 438 [44] Tao W, Chu C, Zhou W, Huang Z, Zhai K, Fang X, et al. Dual Role of WISP1 in maintaining  
439 glioma stem cells and tumor-supportive macrophages in glioblastoma. *Nat Commun* 2020;11:3015.
- 440 [45] Guo X, Pan Y, Gutmann DH. Genetic and genomic alterations differentially dictate low-grade  
441 glioma growth through cancer stem cell-specific chemokine recruitment of T cells and microglia.  
442 *Neuro Oncol* 2019;21:1250-62.
- 443 [46] van de Leemput J, Boles NC, Kiehl TR, Corneo B, Lederman P, Menon V, et al. CORTECON: a  
444 temporal transcriptome analysis of in vitro human cerebral cortex development from human  
445 embryonic stem cells. *Neuron* 2014;83:51-68.
- 446 [47] Wang J, Jenjaroenpun P, Bhinge A, Angarica VE, Del Sol A, Nookaew I, et al. Single-cell gene  
447 expression analysis reveals regulators of distinct cell subpopulations among developing human  
448 neurons. *Genome Res* 2017;27:1783-94.

449 **Figures legends**

450 **Figure 1. Overall architecture of Cancer Stemness Online.** (A), Datasets uploaded by the  
451 users, including transcriptomes or clinical information. (B), Robust computational methods  
452 embedded in the platform. (C), The basic analysis of cancer stemness in the database. (D),  
453 Advanced downstream analysis of the stemness and association with clinical and genetic  
454 features. (E), The cancer stemness atlas provided in Cancer Stemness Online.

455 **Figure 2. Interactive web interface of Cancer Stemness Online.** (A), The methods  
456 provided in the platform for users, including unsupervised and supervised methods. (B), The  
457 data upload page of the platform. (C), Information of the user submitted job. (D), Results for  
458 the basic analysis of CSscores for bulk and single-cell transcriptomes. (E), Screen shot for  
459 multiple methods selection page. (F), Results for the multiple methods. (G), Method  
460 comparison for different methods. (H), Job submission page for the ‘DownStream’ module.  
461 (I), Information for the job submitted by users. (J), Results for the advance analysis,  
462 including heat map of gene signatures, functional pathways and immune regulation, clinical  
463 survival, cell-cell communications and robustness evaluation. (K), The cancer stemness  
464 scores across different cancer types provided in the platform.

465 **Figure 3. Cancer stemness analysis of bulk transcriptomes in hepatocellular carcinoma.**  
466 (A), Distributions of CSscores across hepatocellular carcinoma patients. (B), StemnessIndex  
467 scores of patients in different grades. (C), Scatter plot showing the correlation between  
468 StemnessIndex scores and number of mutations in cancer patients. (D), Heat maps showing  
469 the expression of gene signatures, activities of cancer hallmark pathways, and infiltration of  
470 immune cells. (E), Box plots showing the enrichment scores of DNA repair pathway in  
471 patients with high or low StemnessIndex scores. (F), Box plots showing the enrichment  
472 scores of MYC targets V1 in patients with high or low StemnessIndex scores. (G), Box plots  
473 showing the infiltration of NK cells in patients with high or low StemnessIndex scores. (H),  
474 Kaplan–Meier curve for overall survival of patients with high or low StemnessIndex scores.

475 **Figure 4. Cancer stemness analysis of single-cell transcriptomes in melanoma.** (A),  
476 Number of cells with different CSscores. (B), tSNE plot showing the cells with different  
477 pseudotime and CytoTRACE scores. (C), Distribution of CSscores for cells from post  
478 treatment and naive. (D), Heat maps showing the expressions of gene signatures, activities of  
479 cancer hallmark pathways or cell states, and immune pathways. (E), tSNE plot showing the  
480 distribution of cells based on expressions of gene signatures. (F), tSNE plot showing the

481 distribution of cells coloured by expression of BIRC5. **(G)**, Box plots showing the  
482 enrichment scores of DNA repair pathway in cancer cells with high or low CSscores. **(H)**,  
483 Box plots showing the enrichment scores of proliferations in cancer cells with high or low  
484 CSscores. **(I)**, Cell-cell communications mediated by ligand-receptor interactions.

485

## 486 **Supplementary material**

487 **Figure S1. Accuracy of cancer stemness methods.** (A), The correlation between CS scores  
488 and differentiation days as calculated by the three bulk methods. (B), The correlation between  
489 CS scores and differentiation days as calculated by the six single cell methods. The score was  
490 calculated using Spearman's correlation coefficient.

491 **Table S1. Stemness marker gene sets used in this study.**

492



A

## Uploaded data by users

Bulk RNA-seq

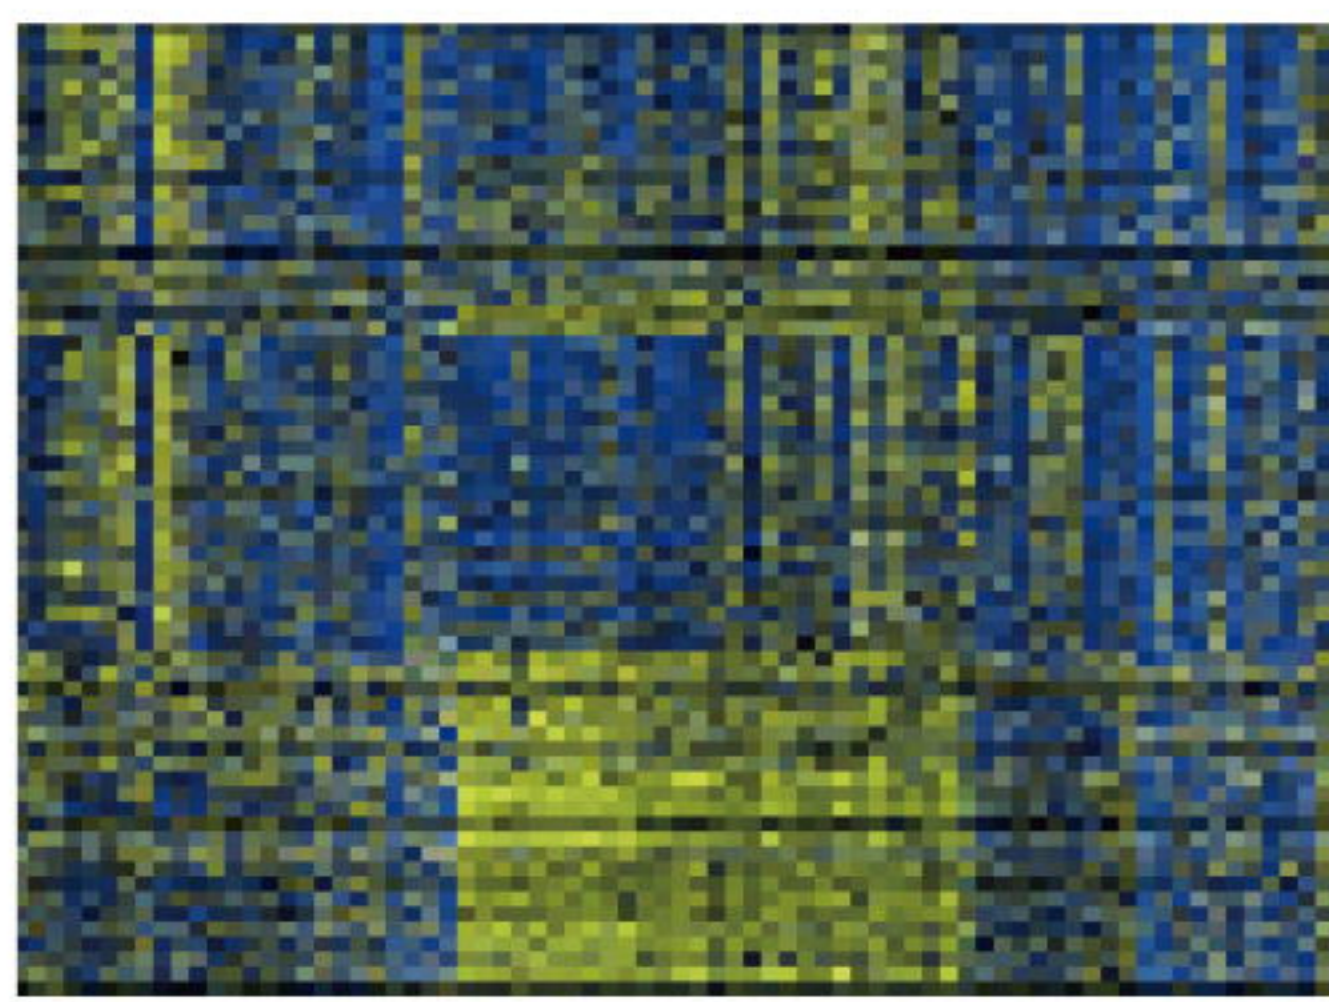

Single cell RNA-seq

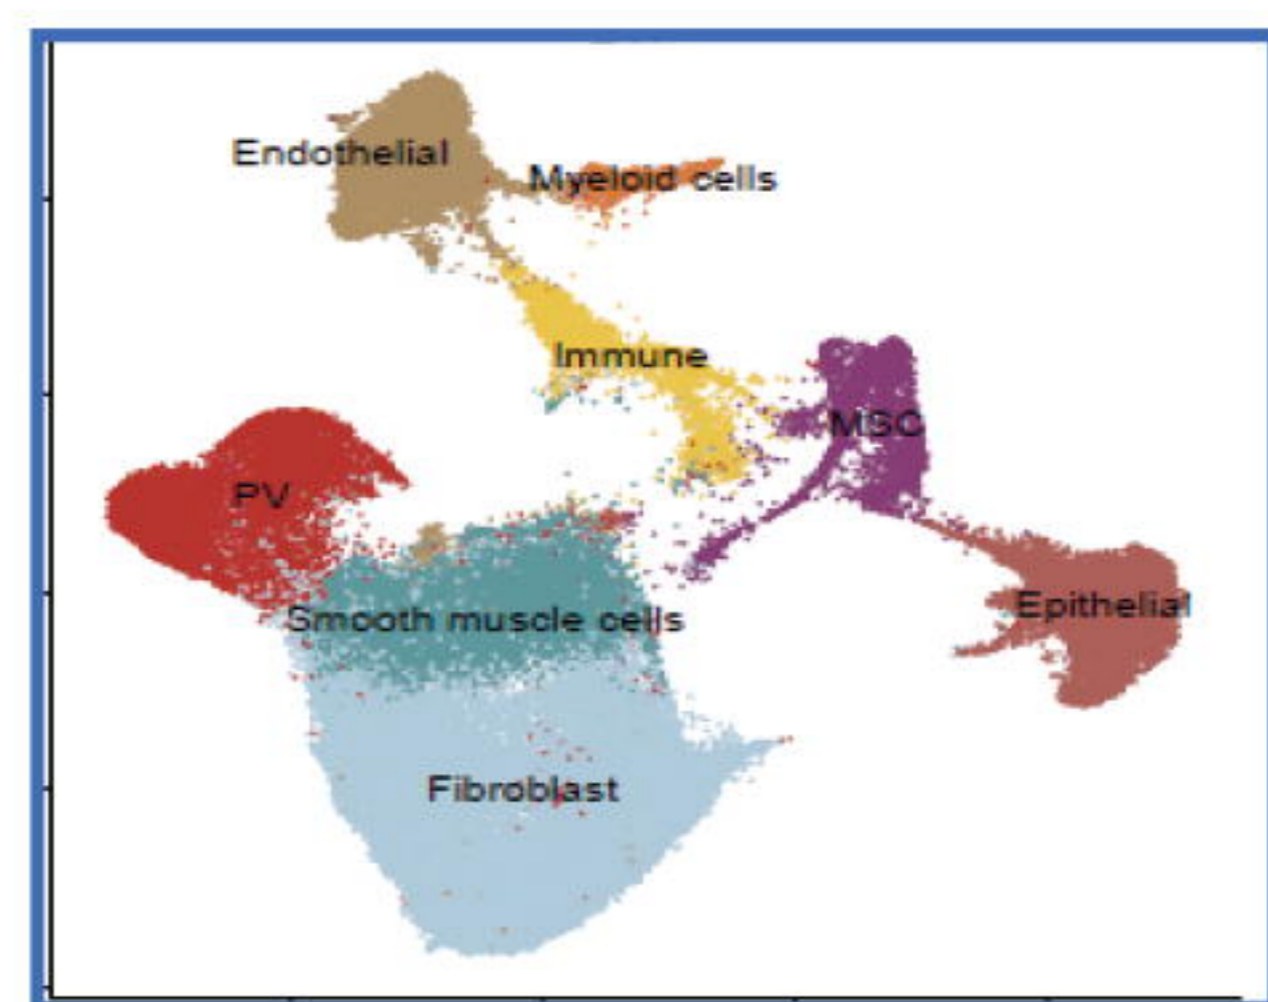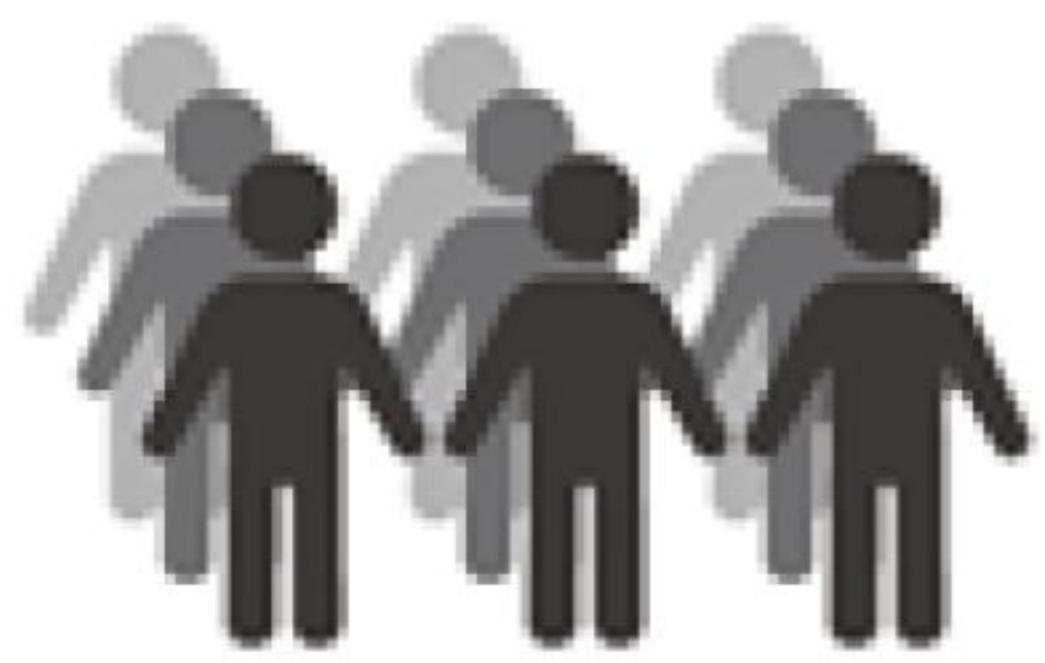

Clinical information

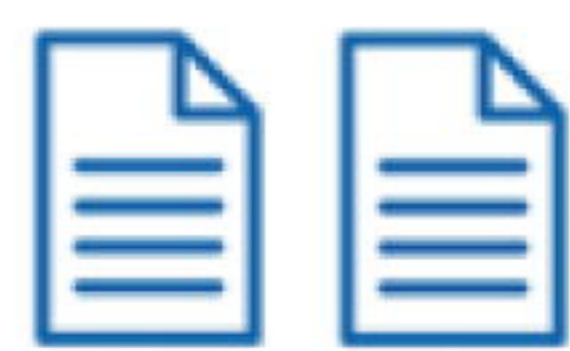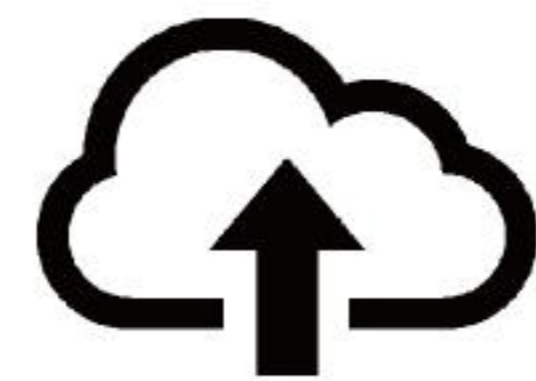

B

## Embedded programs in webserver

Unsupervised

- CytoTRACE
- SLICE
- SCENT
- StemID
- GSVA

Supervised

- mRNAsi
- StemSC
- StemnessIndex

*Eight embedded methods*

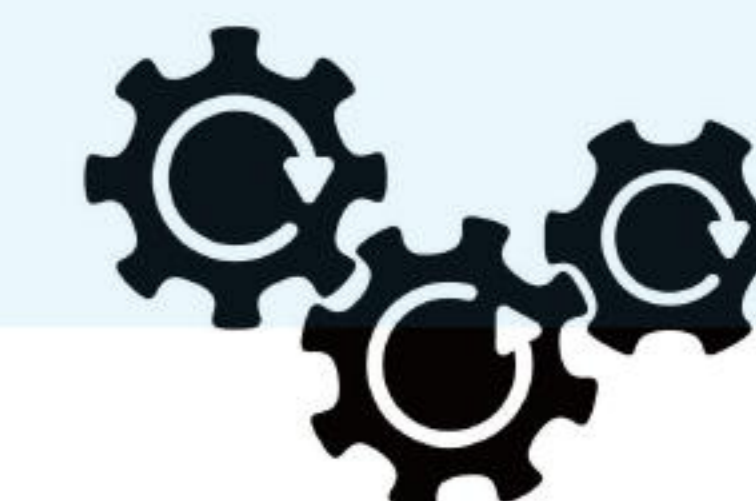

*Datasets*

*Methods*

# Cancer Stemness Online

*Analyses*

*Atlas*

C

## CSscore analysis

- Distributions
- Clinical association

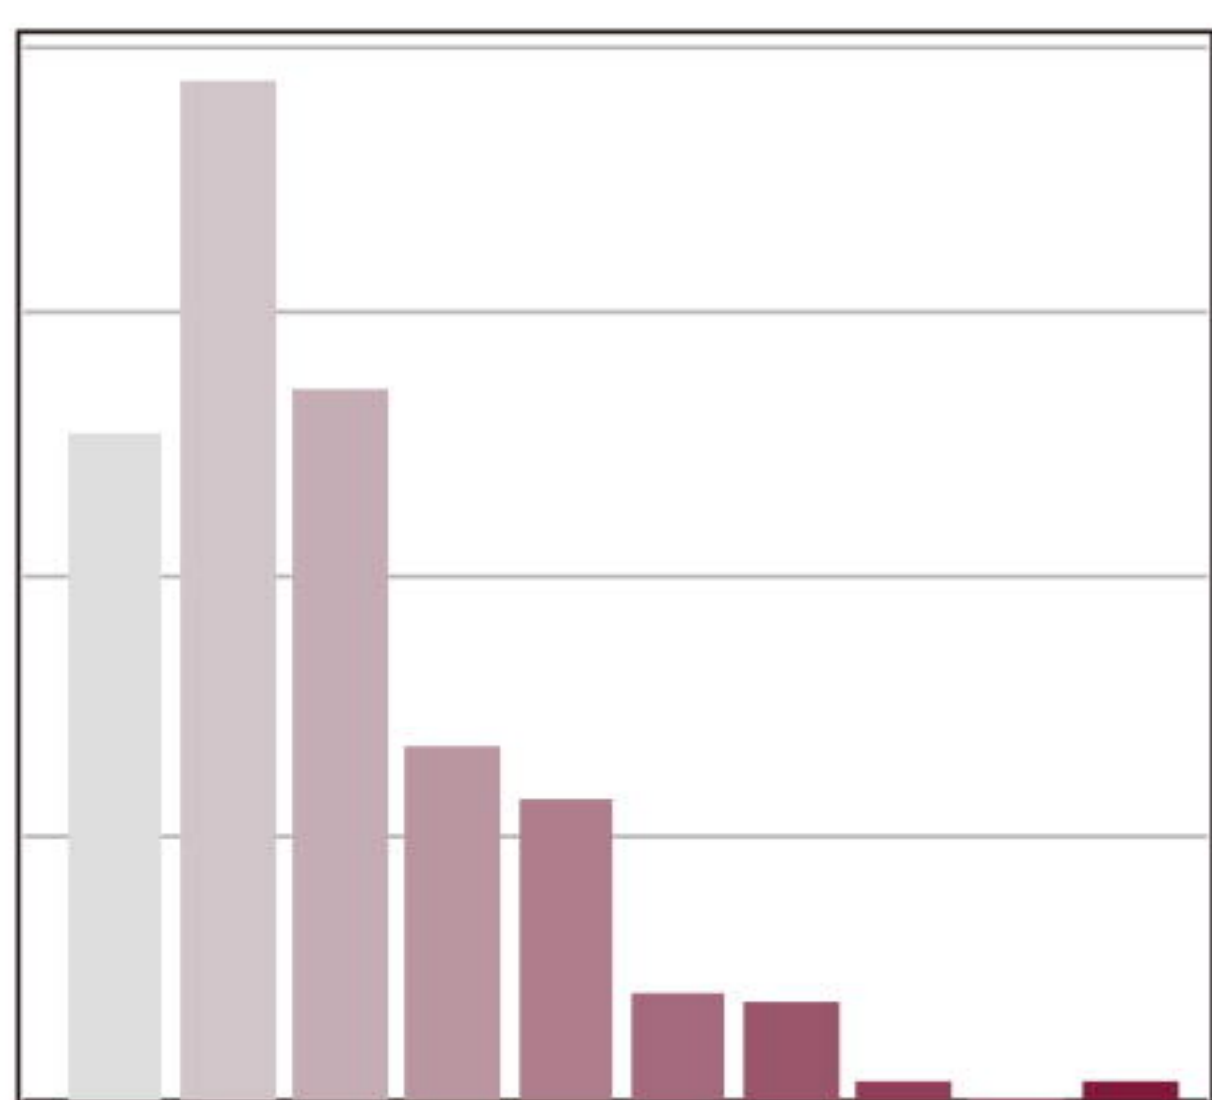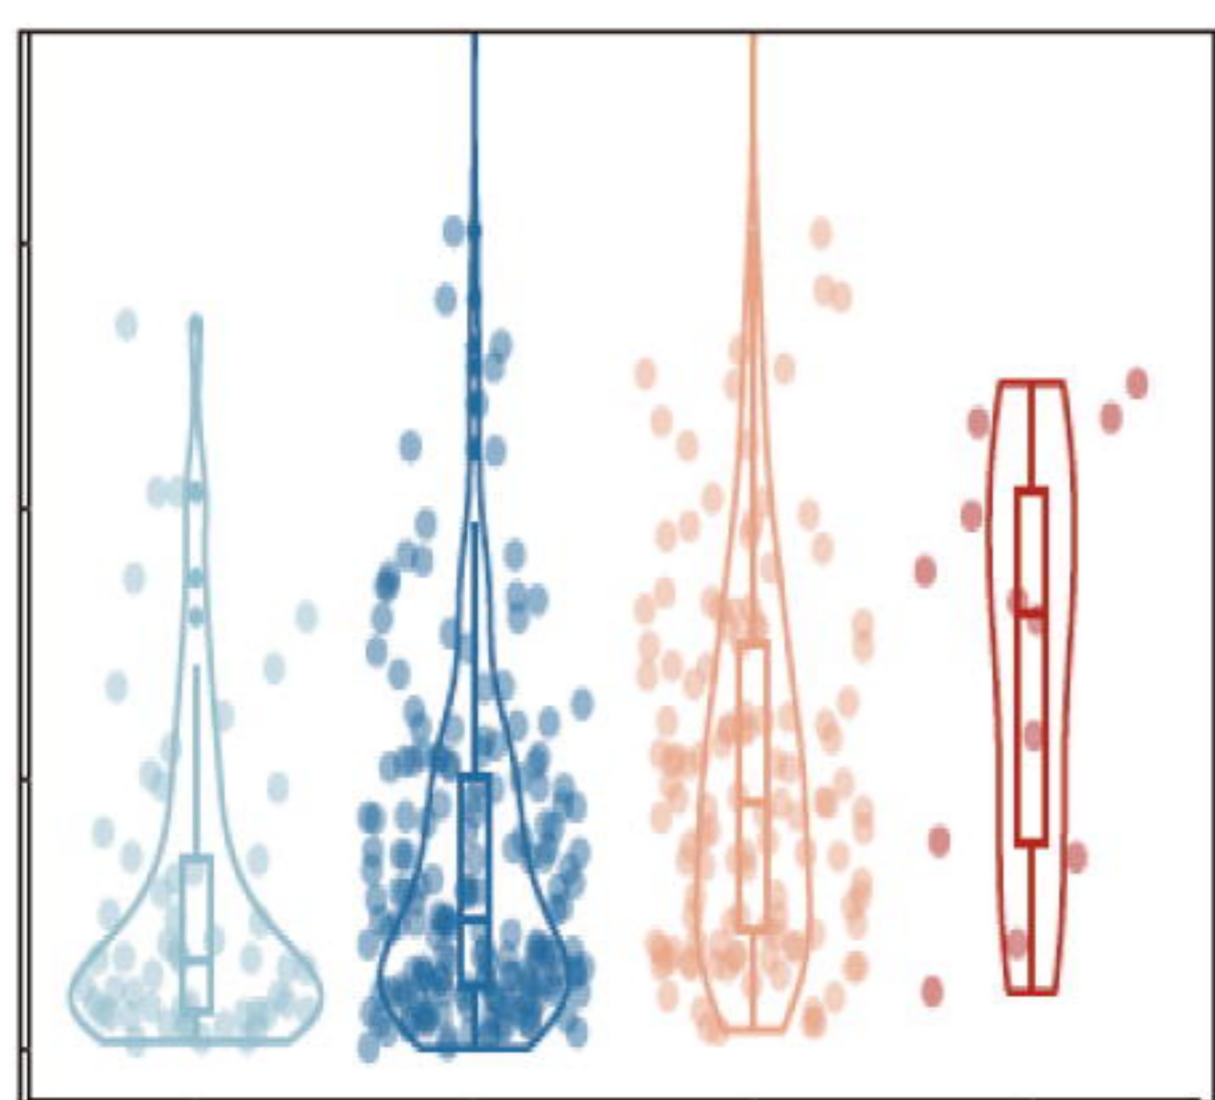

- Cell trajectory analyses

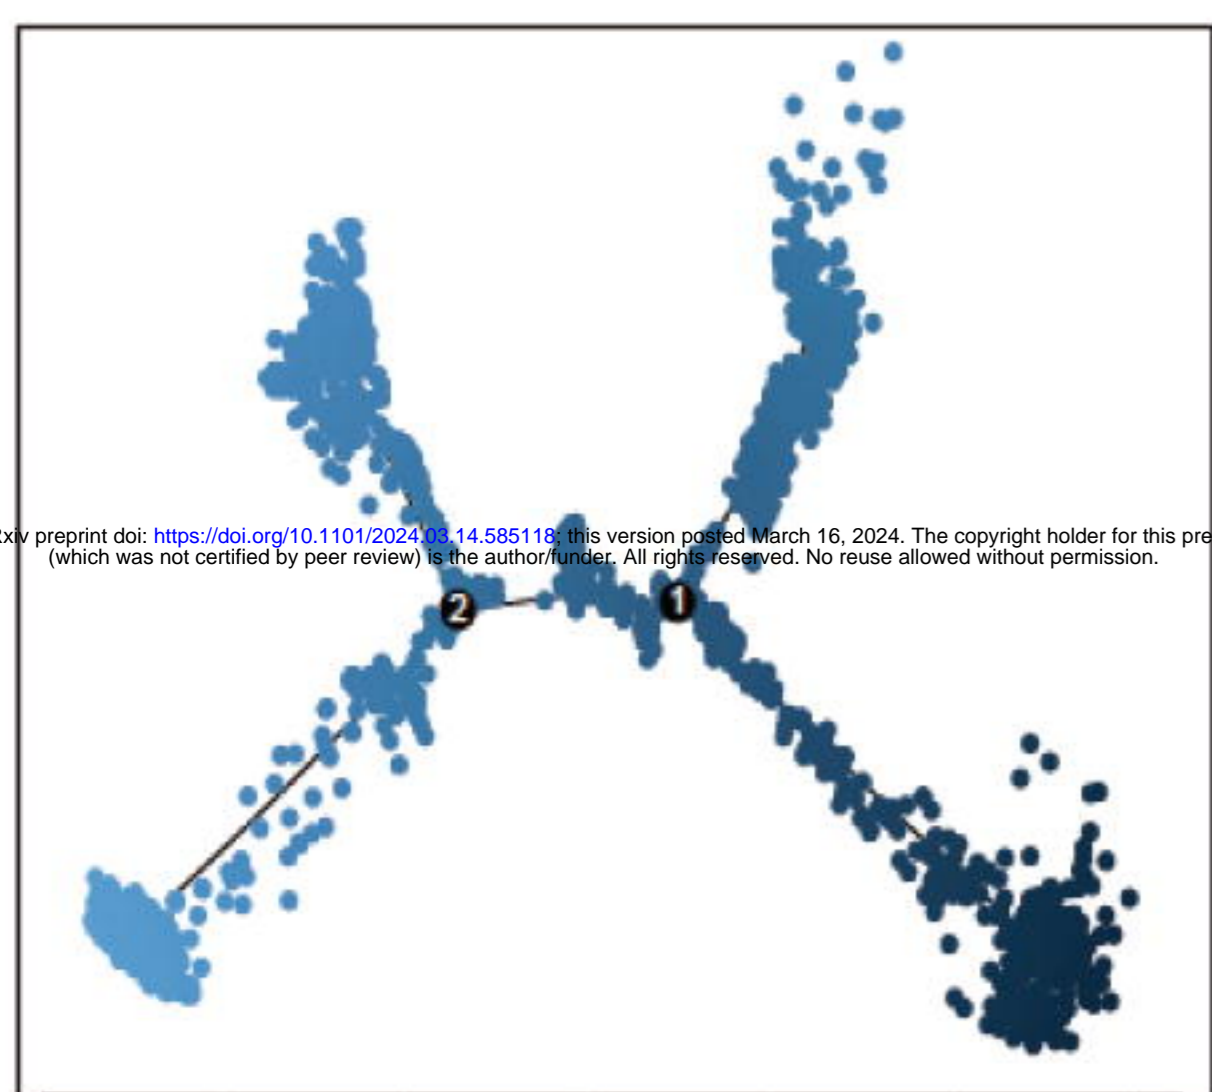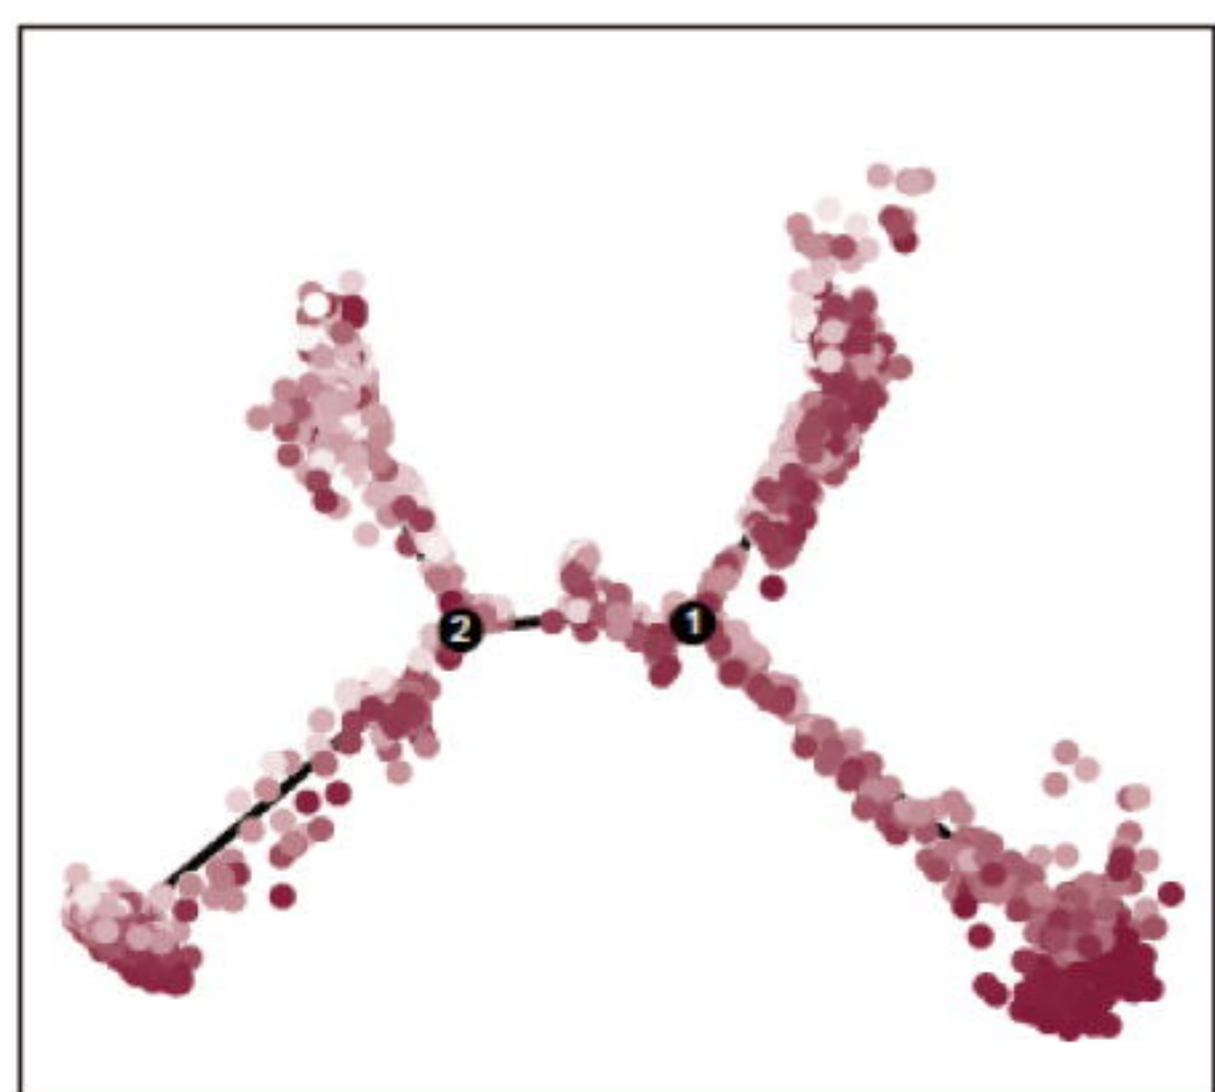

Pseudotime and CSscore

- Associations with genetics

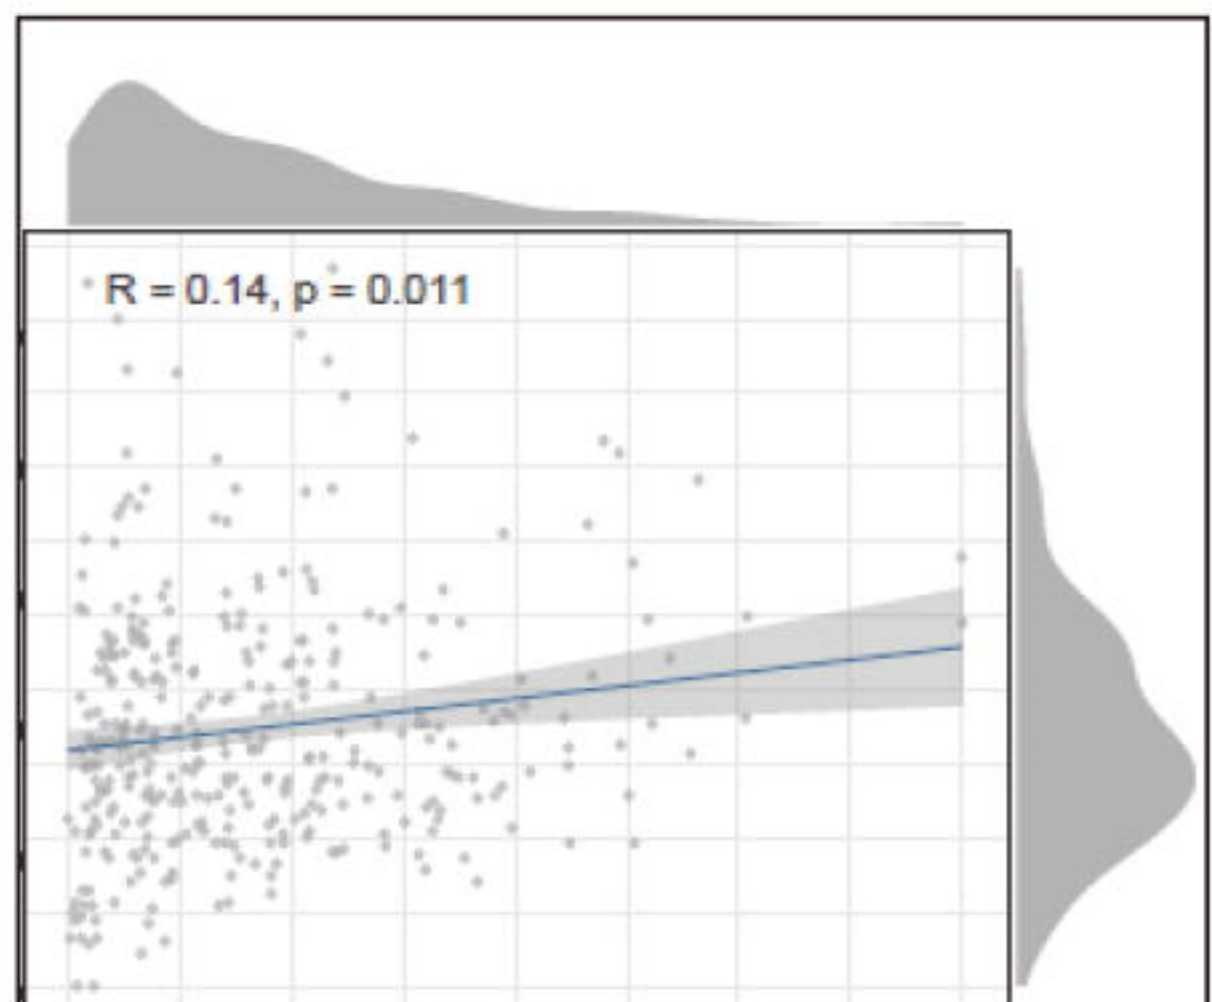

Mutation frequency  
TMB  
Age  
...

*Basic analyses*

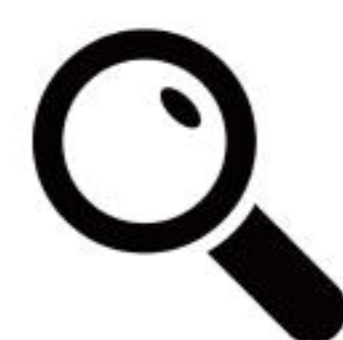

## Downstream analysis

- Signature
- Cluster

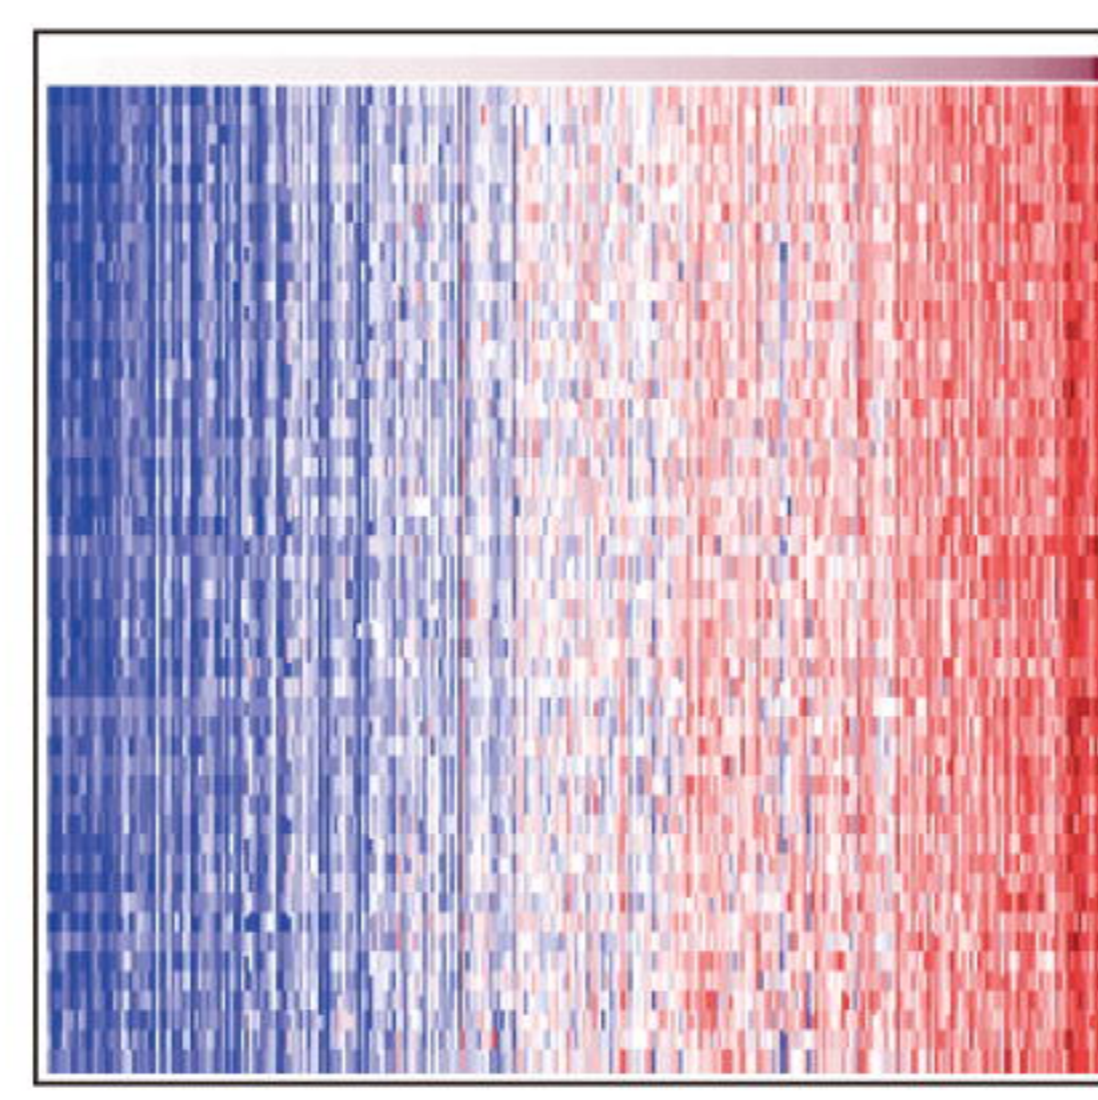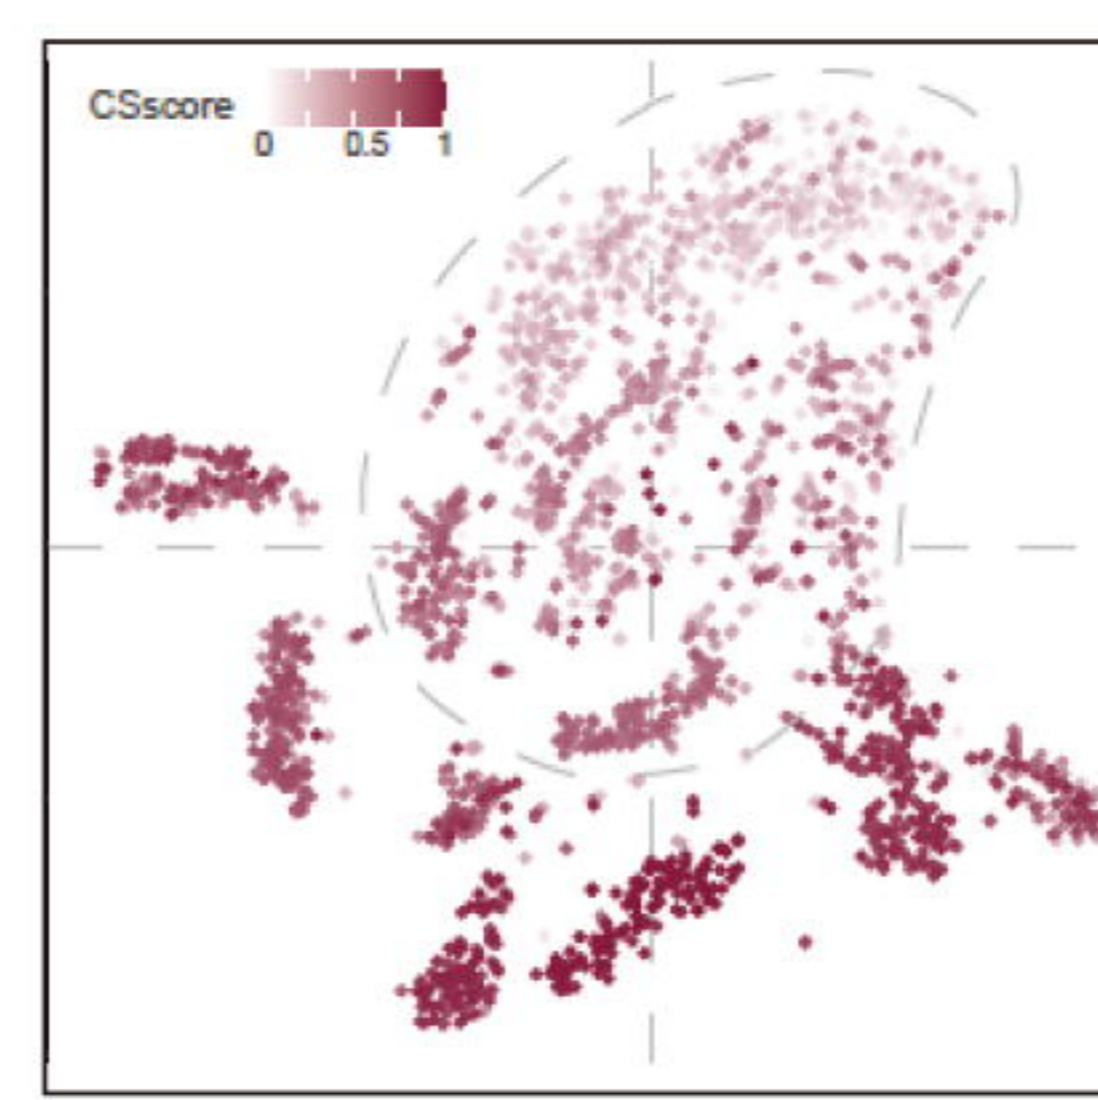

- Survival
- Functions

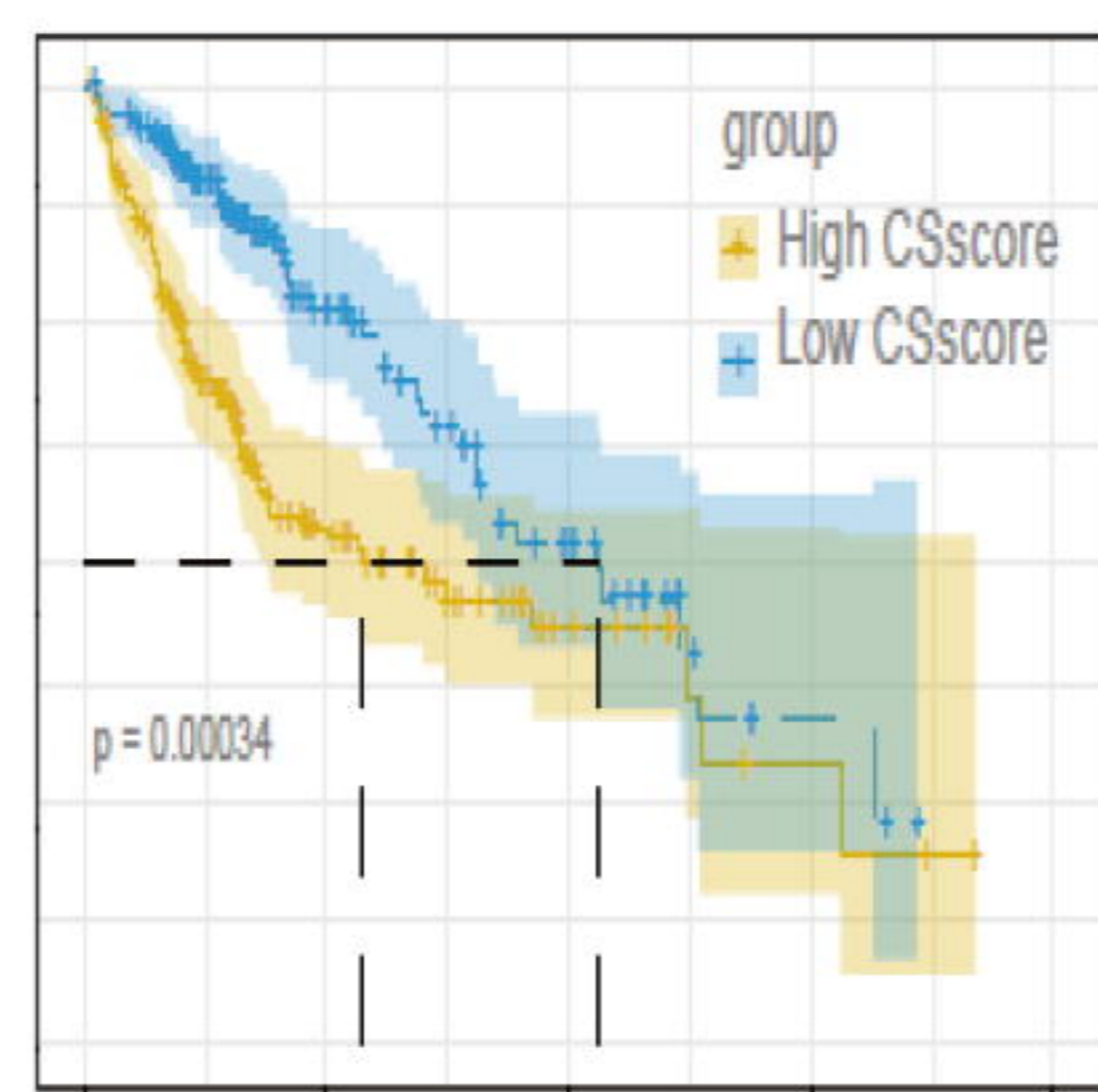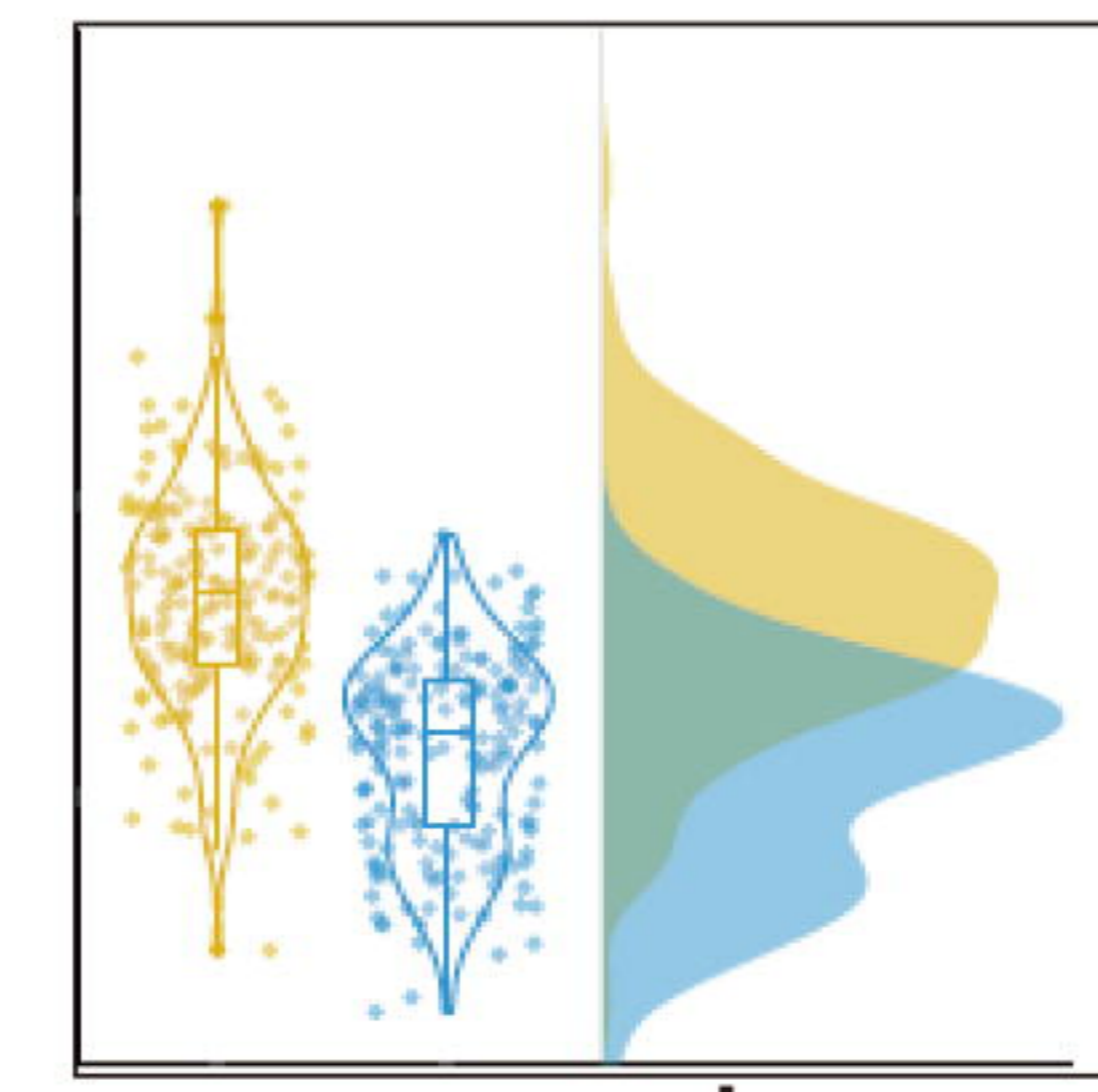

- Cell-cell communications

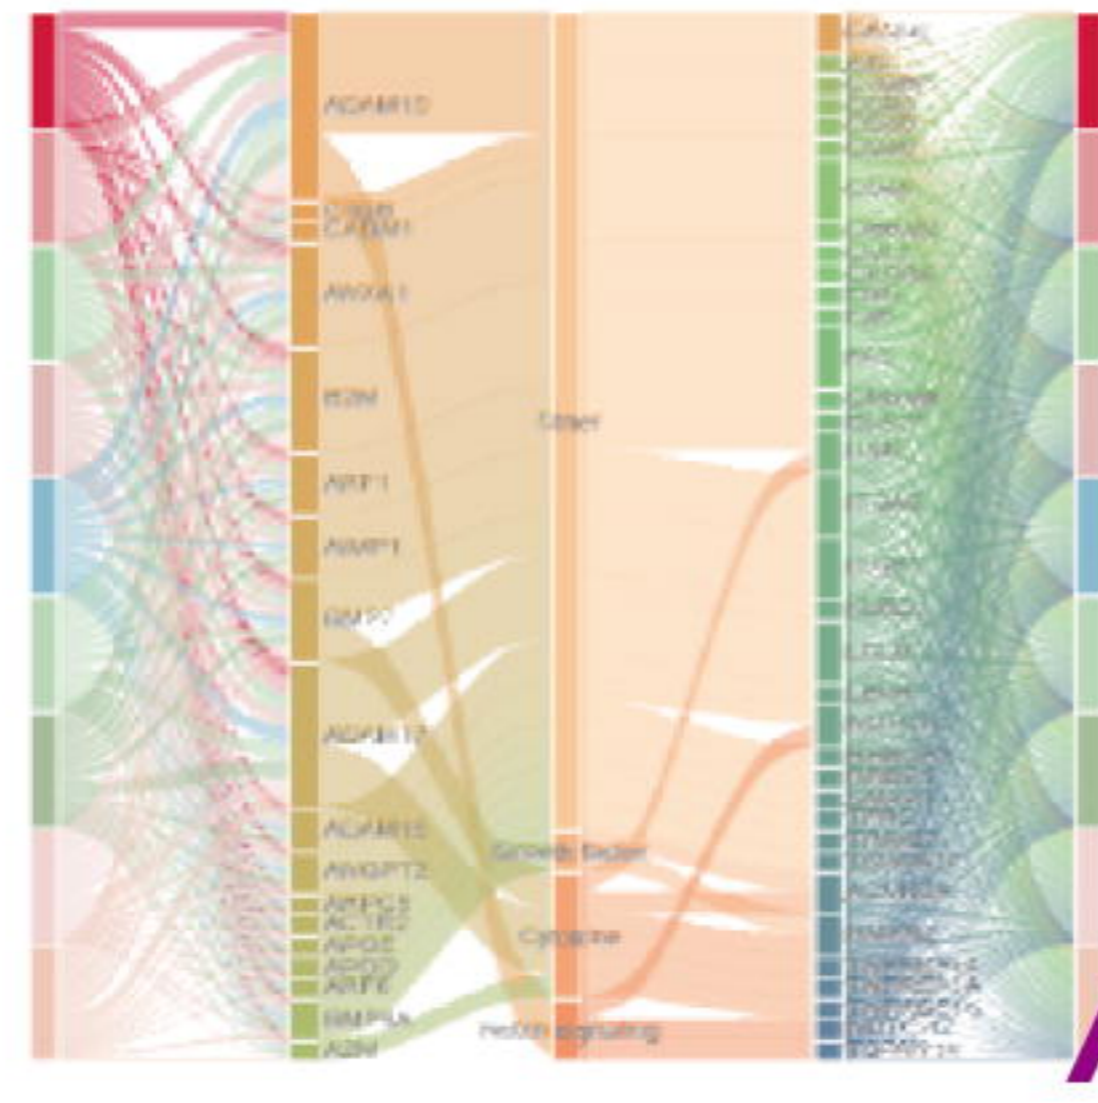

Cancer hallmarks  
Cell states  
Cancer immunity  
...

*Advanced analyses*

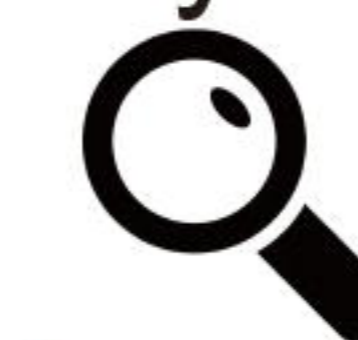

## Cancer stemness atlas

☐ Bulk RNA-seq

☐ ACC(Adrenocortical Cancer)

☐ TCGA

☐ mRNAsi

☐ StemnessIndex

☐ GSVA

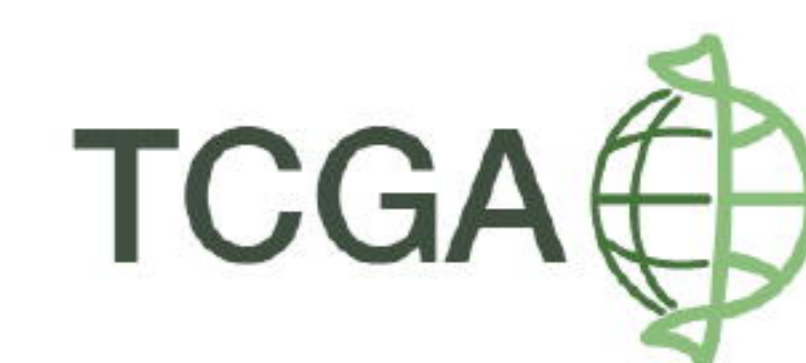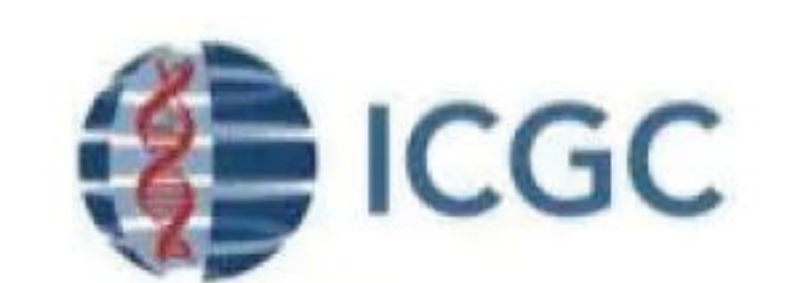

☐ BLCA(Bladder Cancer)

☐ BOCA(Bone Cancer)

☐ BRCA(Breast Cancer)

☐ CESC(Cervical Cancer)

☐ single-cell RNA-seq

☐ GBM(Glioblastoma)

☐ GSE84465

☐ CytoTRACE

☐ SCENT

☐ SLICE

☐ StemID

☐ StemSC

*20000 patients*

*200000 cells*

*CSscore landscape*

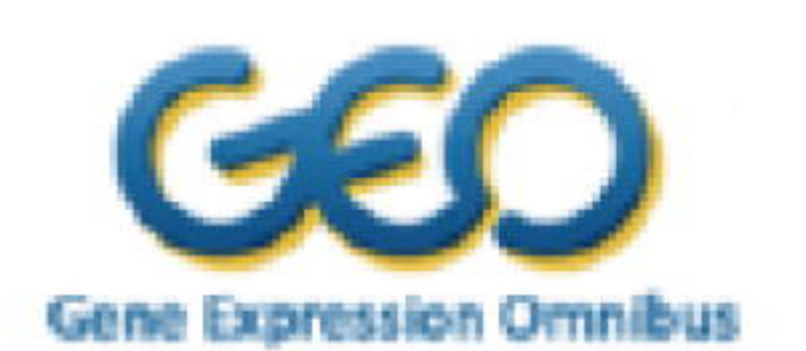

☐ EPN(Ependymoma)

☐ PRAD(Prostate Cancer)

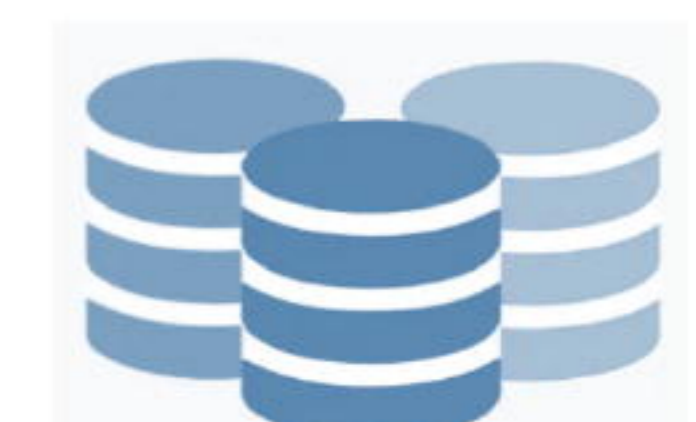

### A Select method to assess stemness scores

- By Model Type**  
The methods are categorized into 'Unsupervised' and 'Supervised' according to the calculation model type.
- Unsupervised methods**
- CytoTRACE
  - SLICE
  - SCENT
  - StemID
  - StemSC
  - StemnessIndex

- By Input Type**  
Users can choose method by the type of uploading data.
- Bulk**
- mRNAsi
  - StemnessIndex
  - GSVA
- Single cell**
- StemID
  - StemSC
  - GSVA

### E Multiple methods

- Multiple method**  
Upload data and choose methods to assess stemness scores
- Single cell
  - Bulk
  - Supervised method
  - Unsupervised method

### B Upload datasets

Click to view example

Expression profile  Sample information

### C Job overview Job information

|                 |                                                           |
|-----------------|-----------------------------------------------------------|
| Job ID          | CytoTRACE example                                         |
| Algorithm       | CytoTRACE                                                 |
| Expression file | GSE115978_TPM.txt <input type="button" value="Download"/> |

### D Results for different methods

**Cancer stemness score**

| Cells  | CSscore |
|--------|---------|
| Cell_1 | 1       |
| Cell_2 | 0.9542  |

### Single-cell trajectory analysis

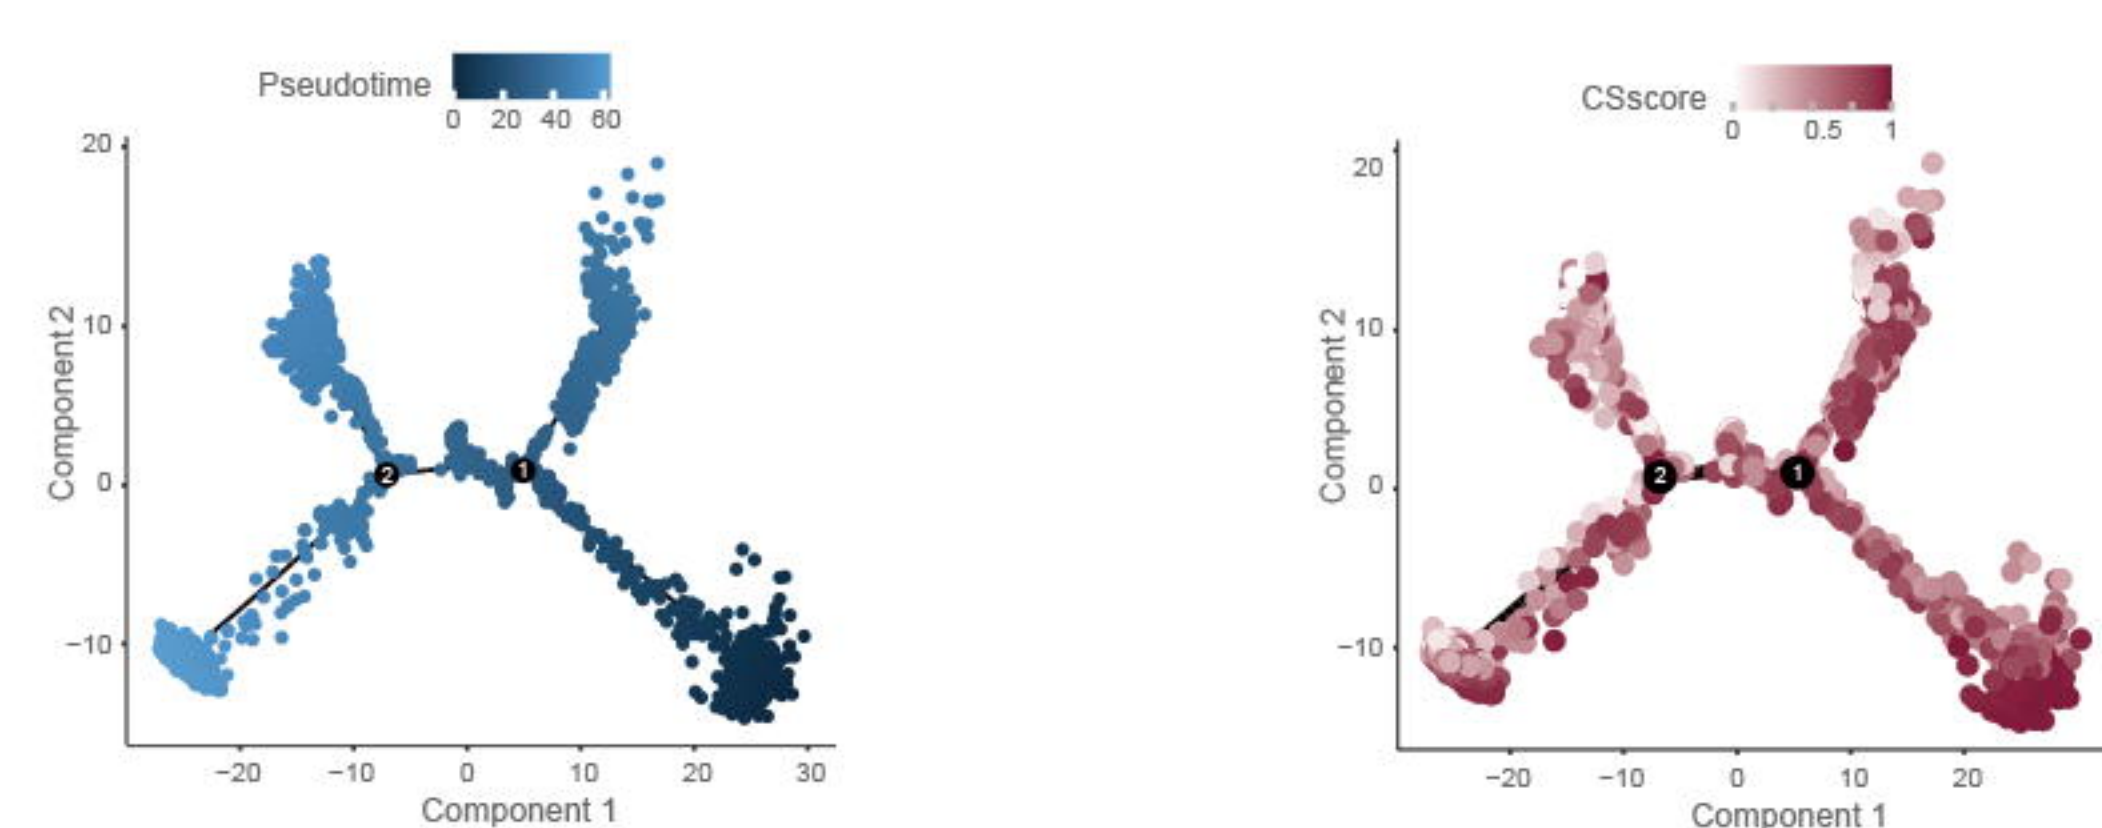

### Clinical feature analysis

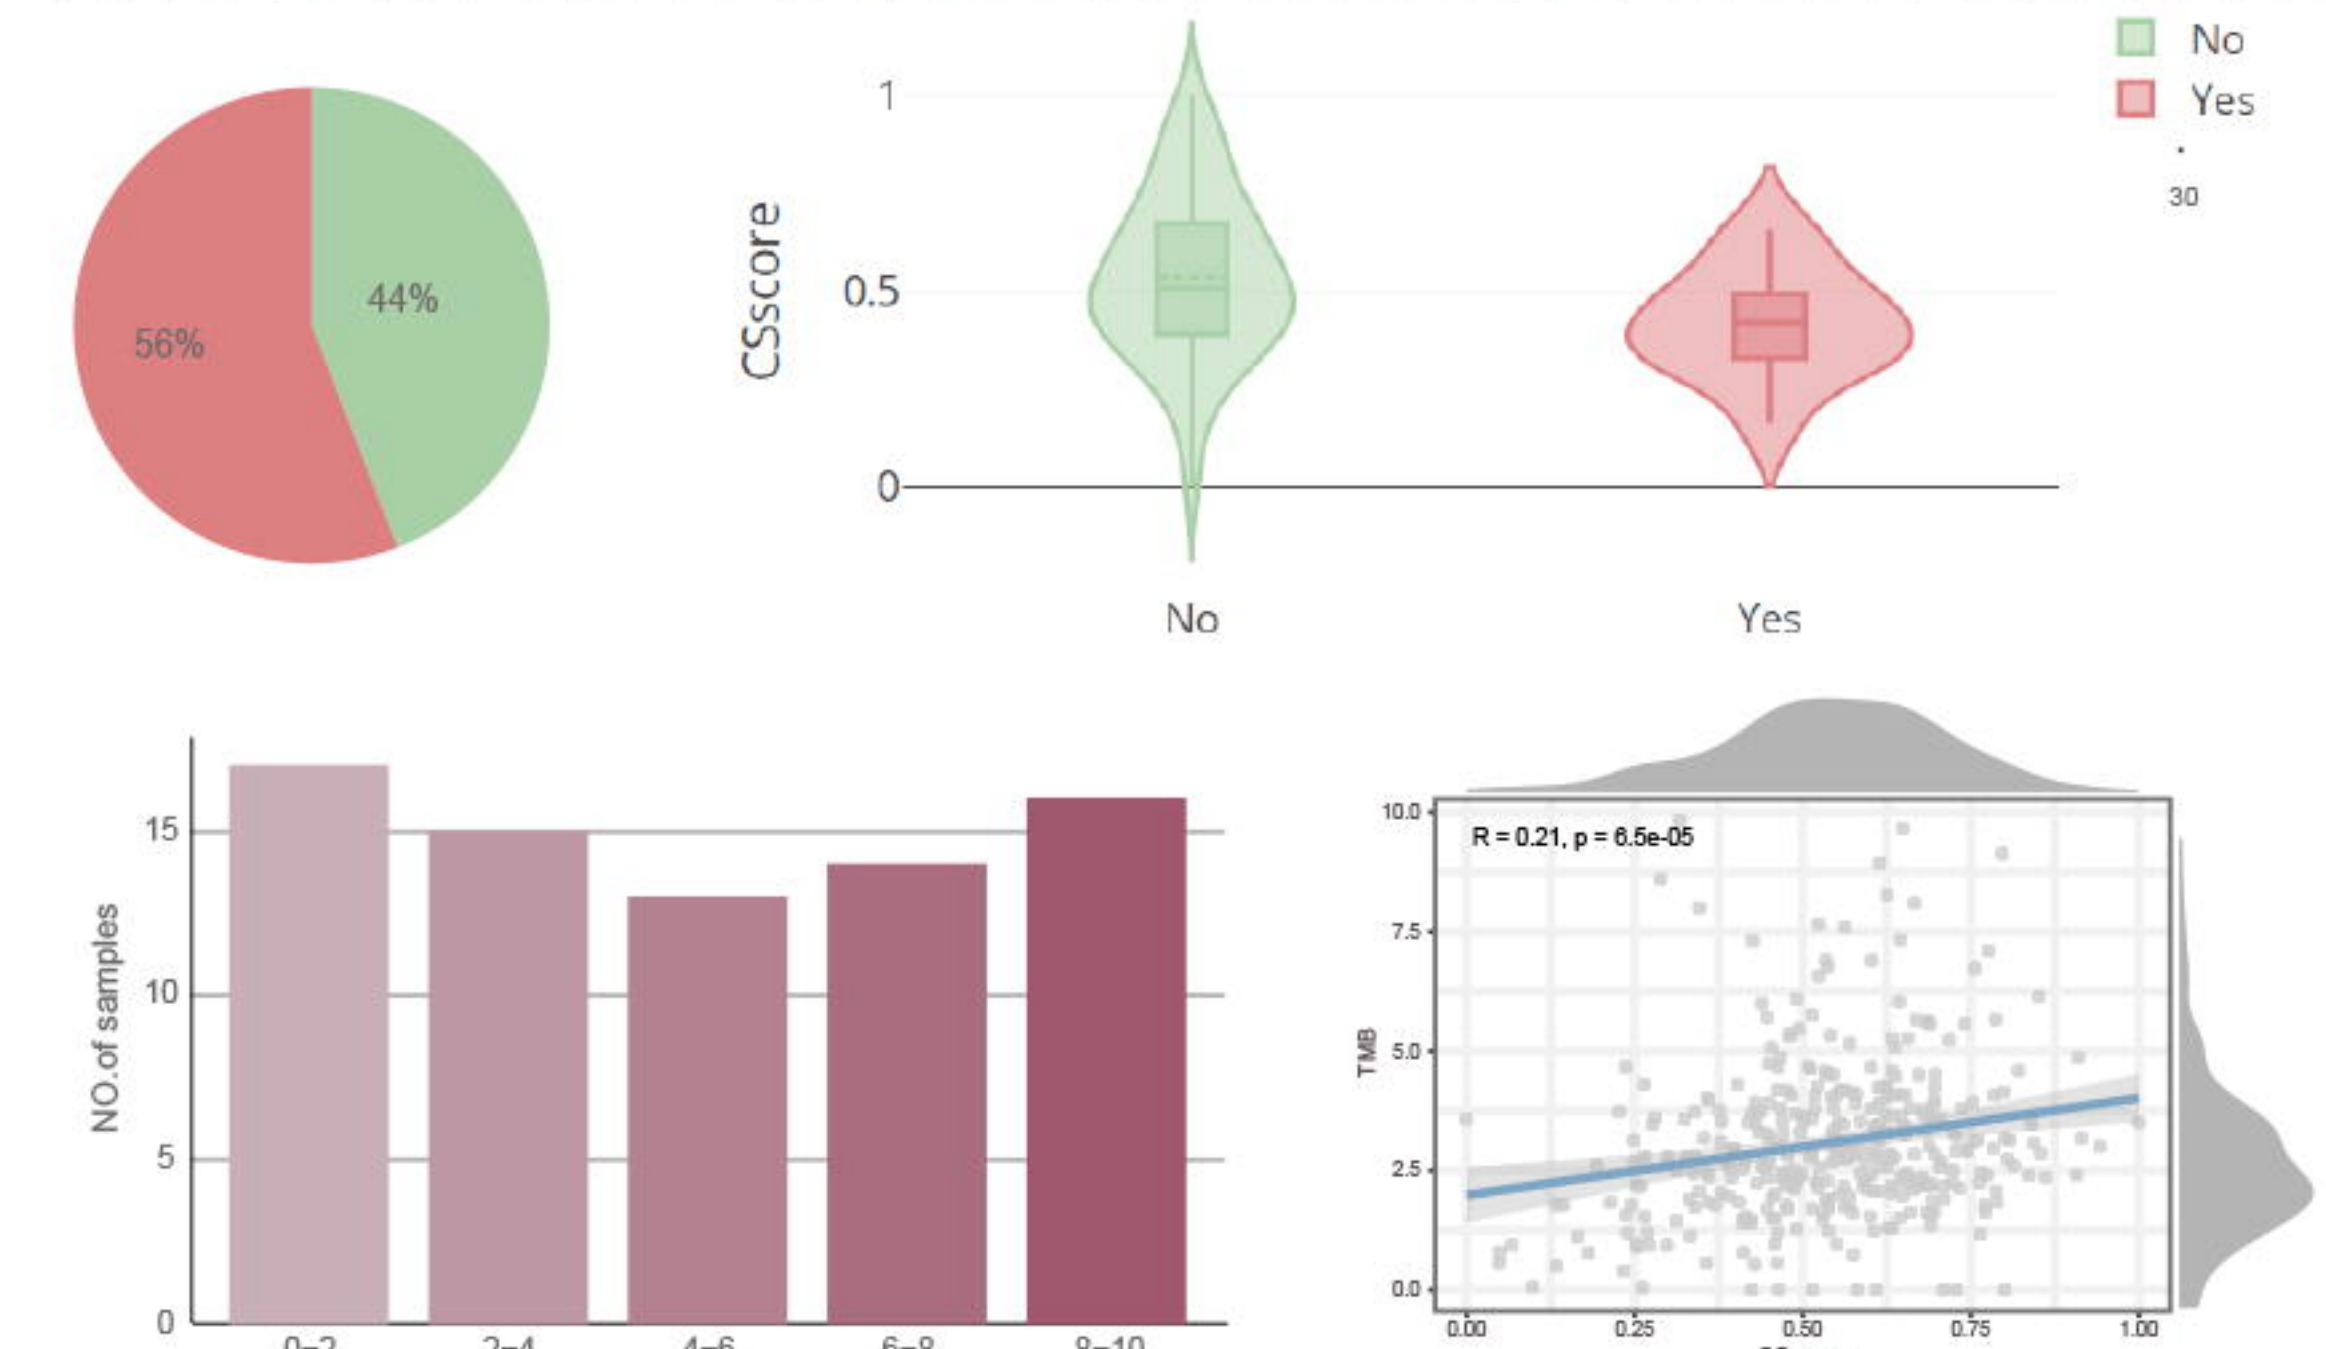

### F Results for multiple methods

| Sample   | StemnessIndex | mRNAsi | GSVA_Ben | RRA_p | RRA_rank |
|----------|---------------|--------|----------|-------|----------|
| sample_1 | 1             | 0.806  | 1        | 0.94  | 0.06     |
| sample_2 | 0.763         | 0.93   | 0.98     | 0.24  | 0.76     |

### G Method comparison

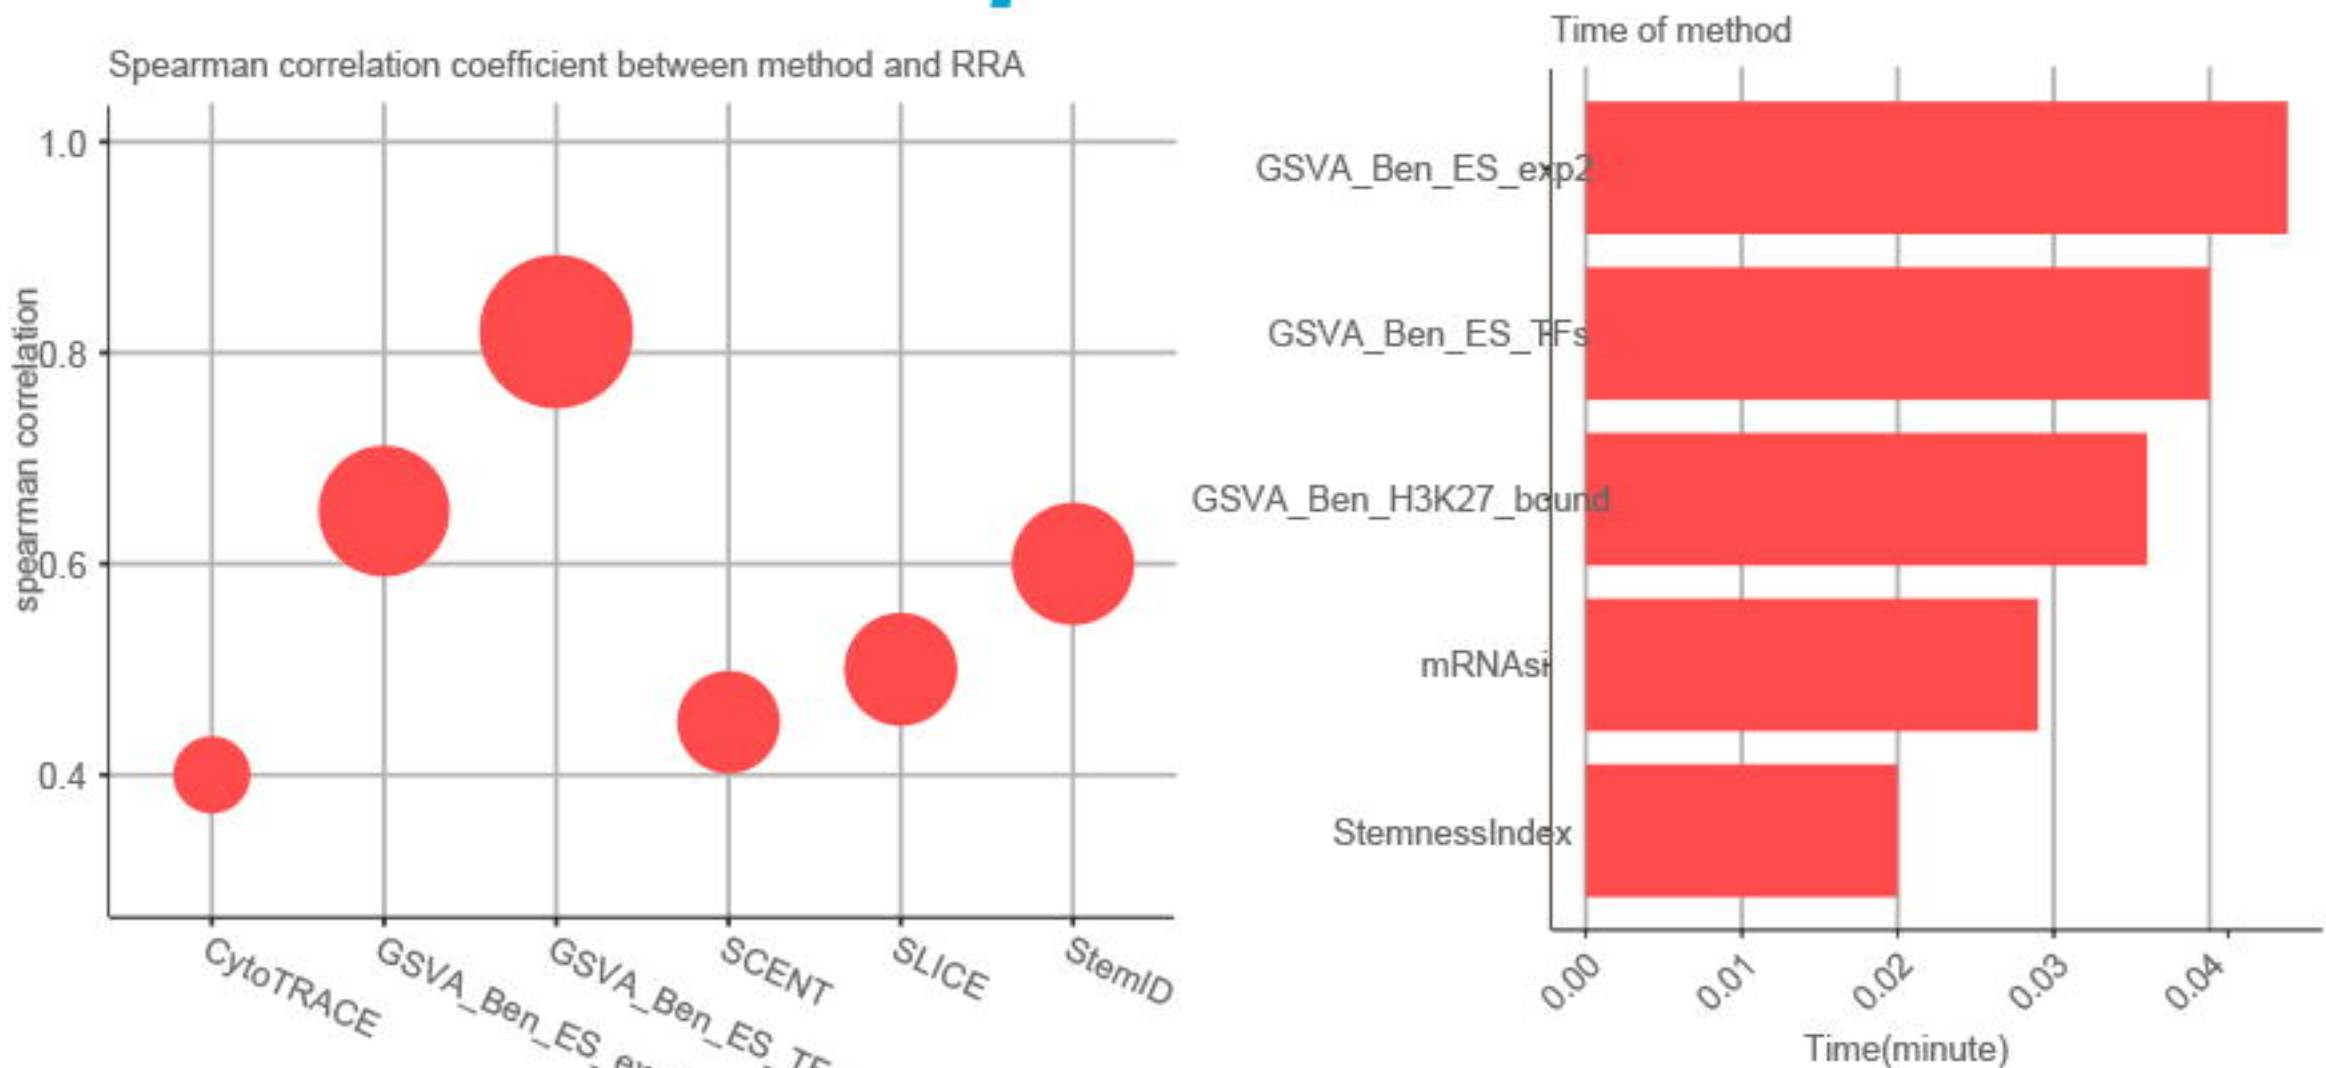

### H Downstream analysis

Job ID

Threshold for stemness signature

Clinical data (optional)

Click to view example

### I Job overview Job information

|                 |                                                       |
|-----------------|-------------------------------------------------------|
| Job ID          | StemnessIndex example                                 |
| Algorithm       | StemnessIndex                                         |
| Expression file | TCGA_LUAD.txt <input type="button" value="Download"/> |

### J Results for gene signatures function and cell communications

| Gene  | R value | P value    | FDR        | Detail                                |
|-------|---------|------------|------------|---------------------------------------|
| LPIN3 | 0.5393  | 4.5802e-39 | 1.3878e-35 | <input type="button" value="Detail"/> |
| ARGFX | 0.504   | 1.45e-05   |            | <input type="button" value="Detail"/> |

### Function analysis

Cancer Hallmark

| Cell Type   | R value | P value | FDR    | Detail                                |
|-------------|---------|---------|--------|---------------------------------------|
| Eosinophils | 0.63    | 4.5e-9  | 1.3e-3 | <input type="button" value="Detail"/> |
| Neutrophils | 0.73    | 3.1e-05 |        | <input type="button" value="Detail"/> |

### Survival analysis

|                          |        |
|--------------------------|--------|
| P value (cox regression) | 0.016  |
| Beta value               | -1.152 |
| P value (log rank)       | 0.0034 |

### Communications to immune cells

| Sending Cell Type | Ligand | Receiving Cell Type | Receptor | Function   | Score |
|-------------------|--------|---------------------|----------|------------|-------|
| CancerStemCell    | MIF    | CAF                 | ZNRF3    | Checkpoint | 3.33  |
| T cell            | B2M    | NK cell             | LRP1     | Chemokine  | 3.10  |

### Robustness evaluation

| Sample   | StemnessIndex | Supervised_mRNAsi | Supervised_GSVA |
|----------|---------------|-------------------|-----------------|
| sample_1 | 1             | 0.806             | 1               |
| sample_2 | 0.763         | 0.93              | 0.98            |

### K Atlas of CSscore across cancer types

- Bulk RNA-seq
  - ACC(Adrenocortical Cancer)
  - TCGA
    - mRNAsi
    - StemnessIndex
    - GSVA
  - BLCA(Bladder Cancer)
  - BOCA(Bone Cancer)
  - BRCA(Breast Cancer)
  - CESC(Cervical Cancer)
- single-cell RNA-seq
  - GBM(Glioblastoma)
  - GSE84465
  - CytoTRACE
  - SCENT
  - SLICE
  - StemID
  - StemSC
  - EPN(Ependymoma)
  - PRAD(Prostate Cancer)

### Result

| Sample   | CSscore |
|----------|---------|
| sample_1 | 1       |
| sample_2 | 0.85    |

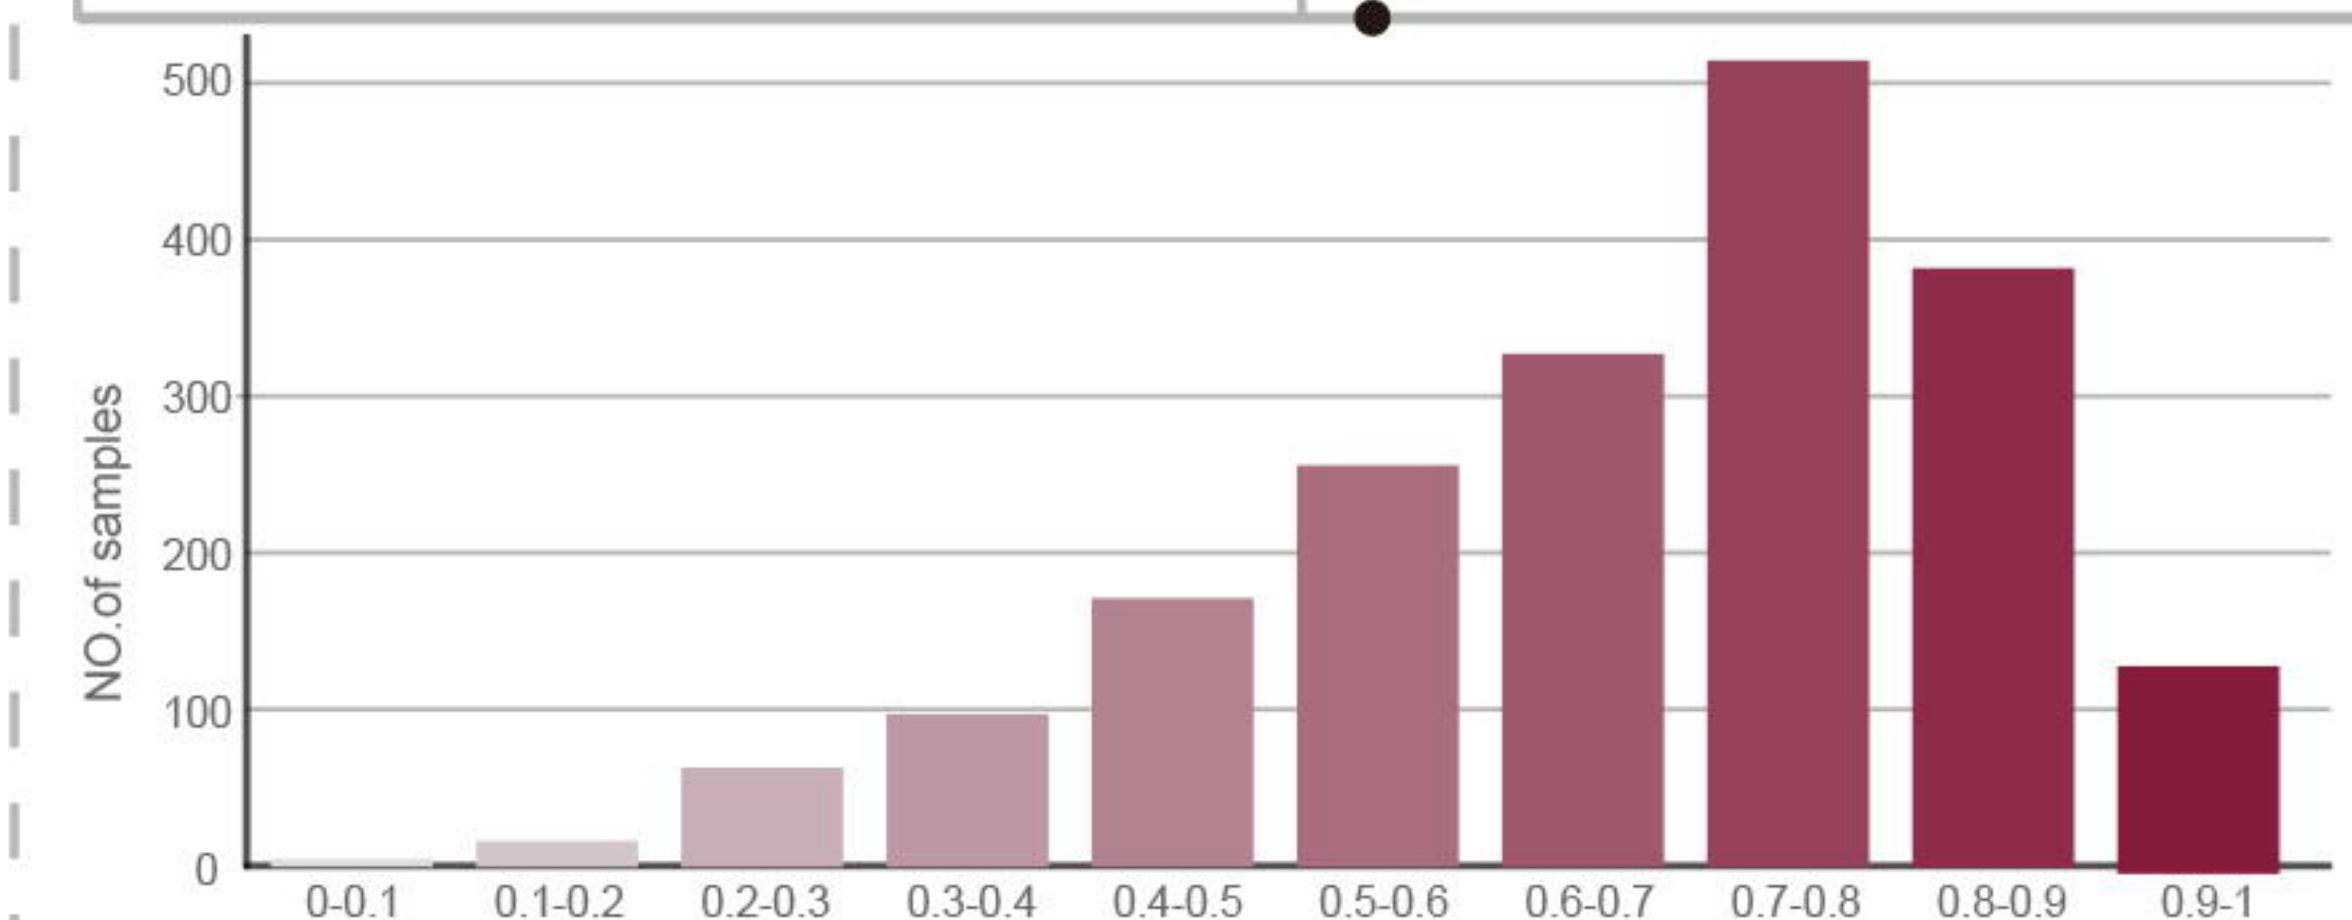

### Gene signatures

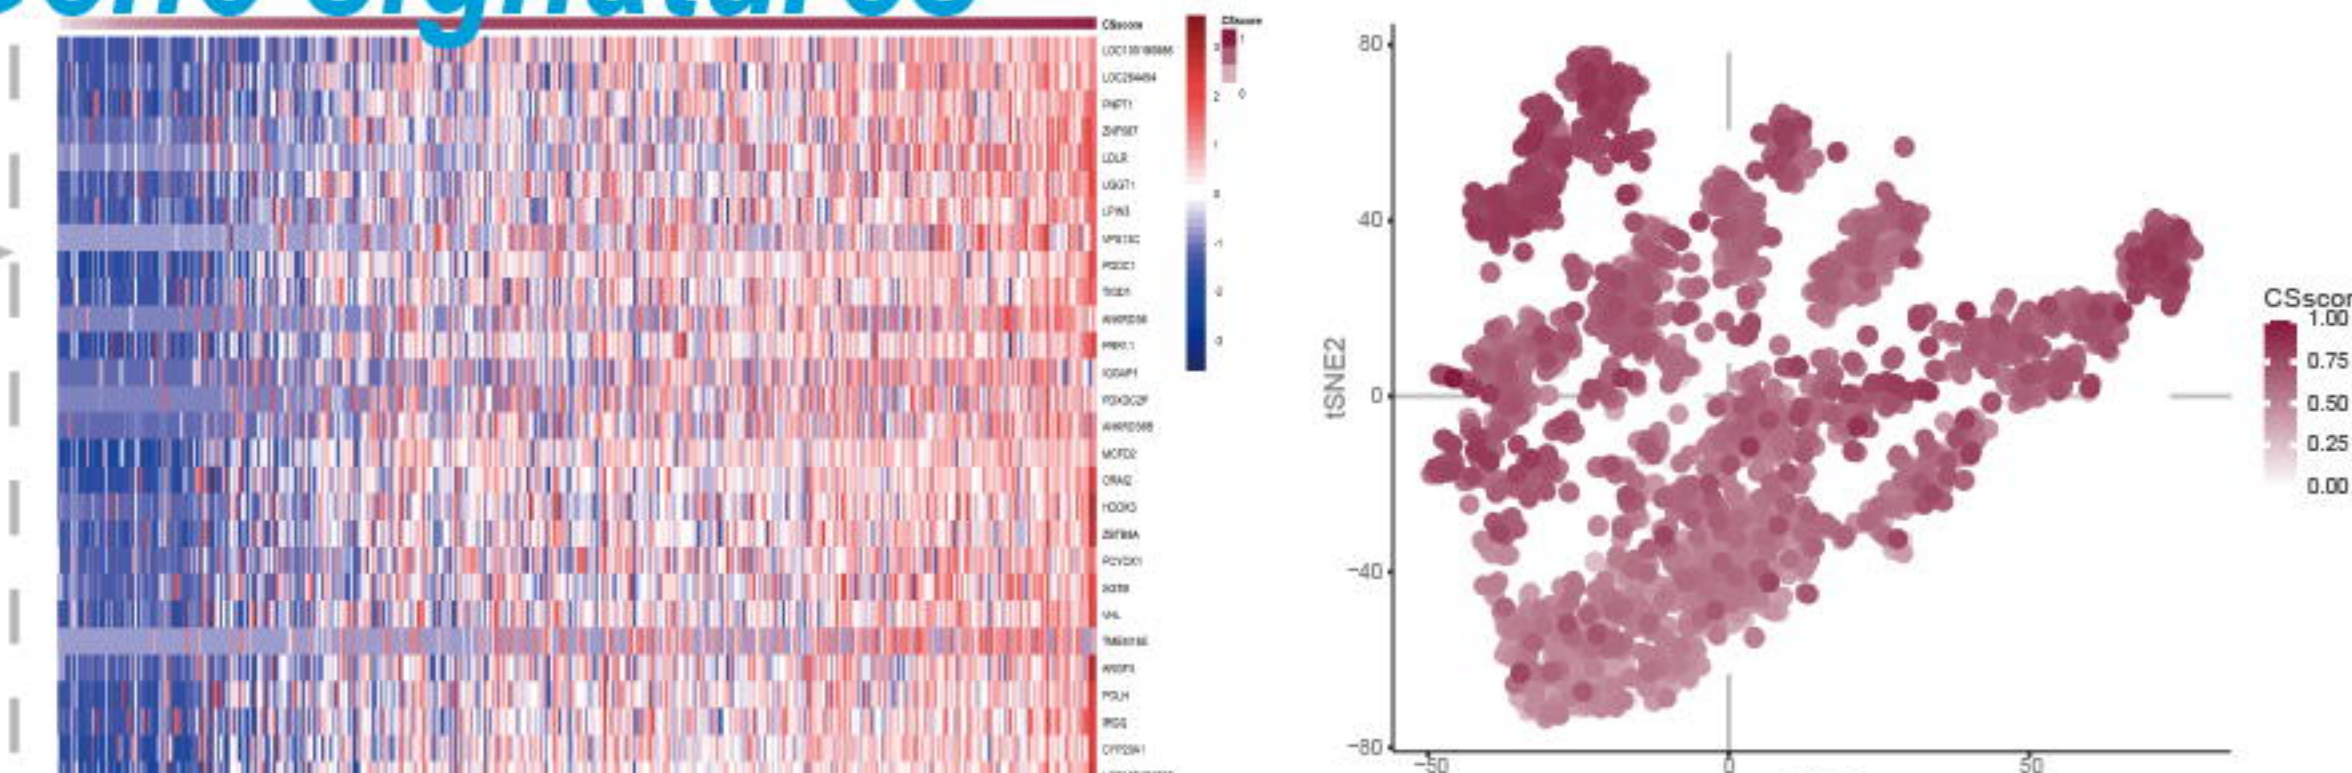

### Functional pathways

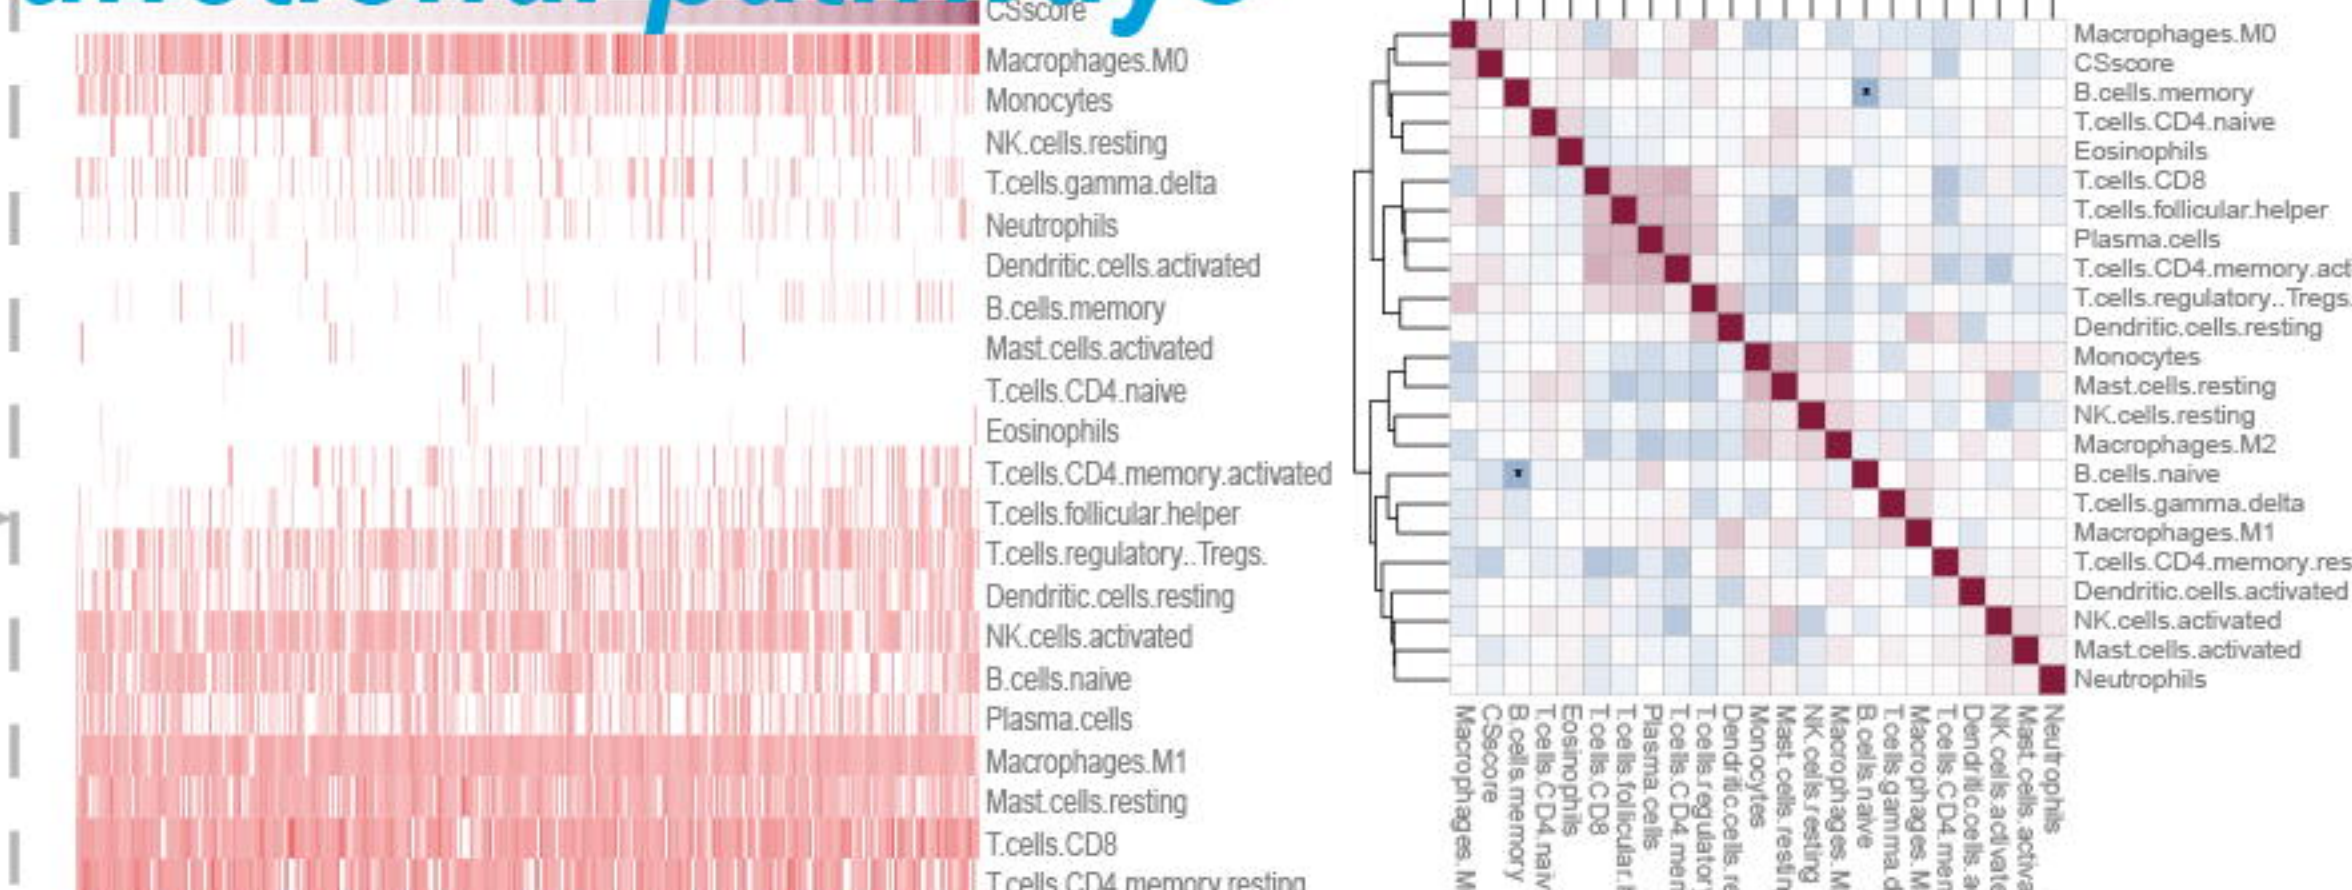

### Clinical survival

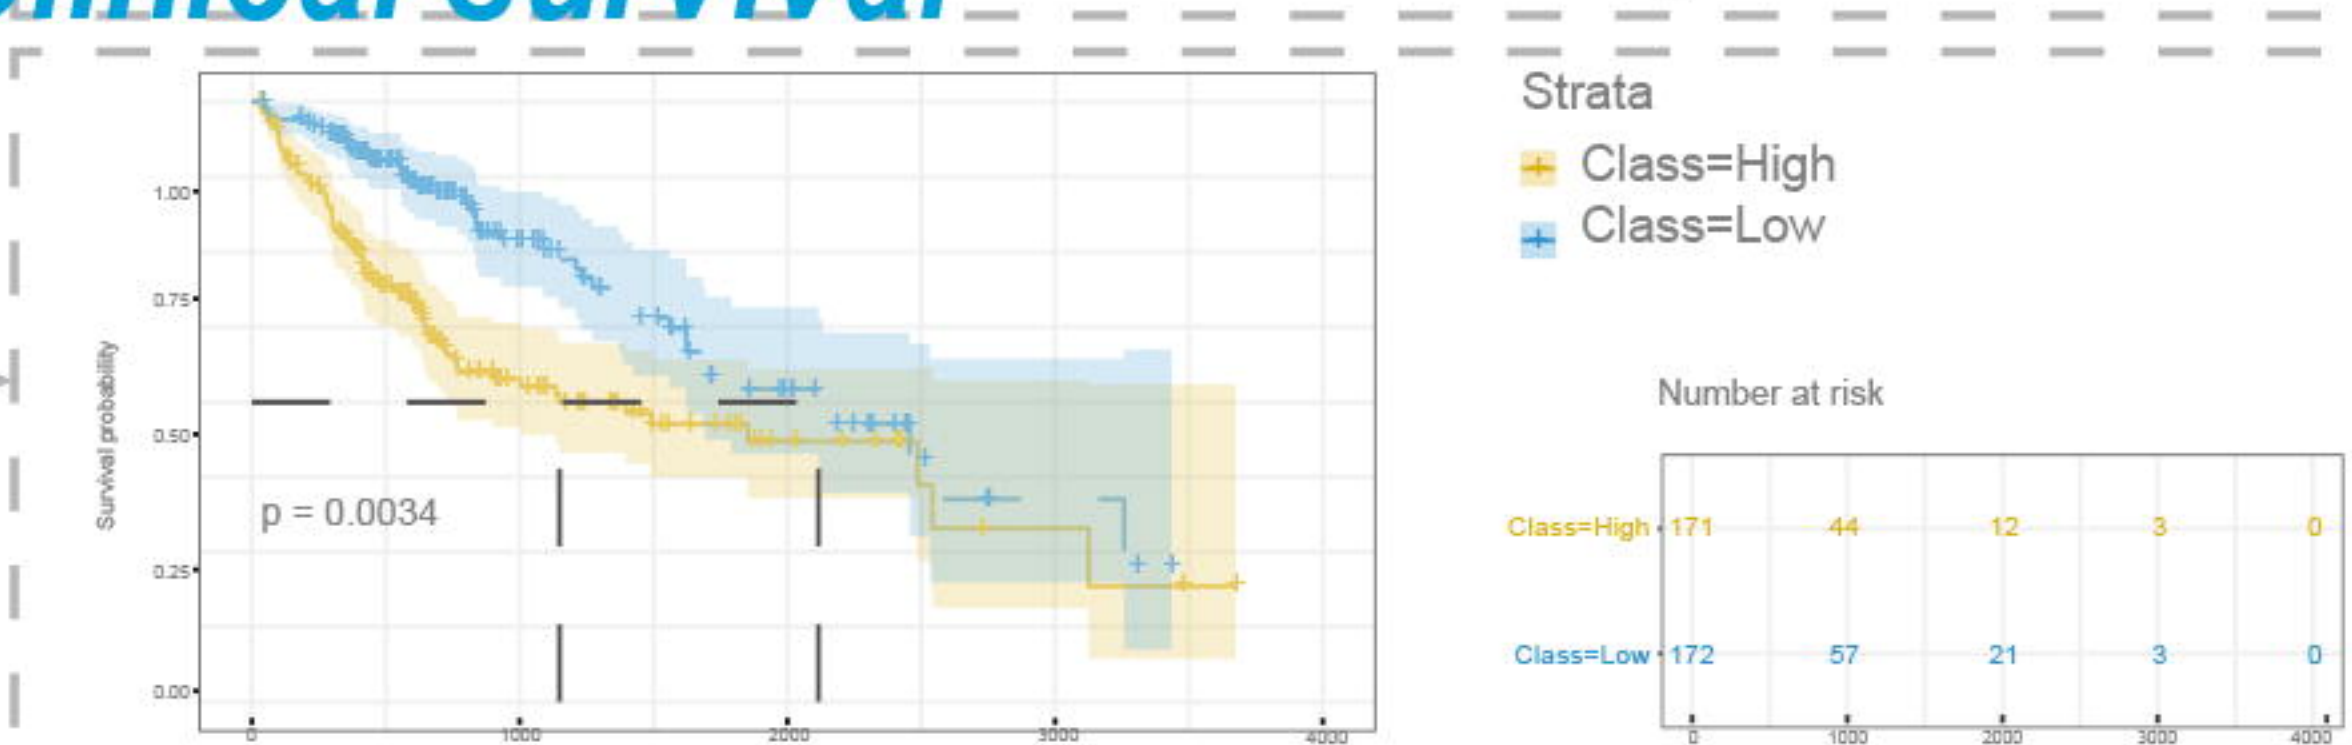

### Cell-cell communications

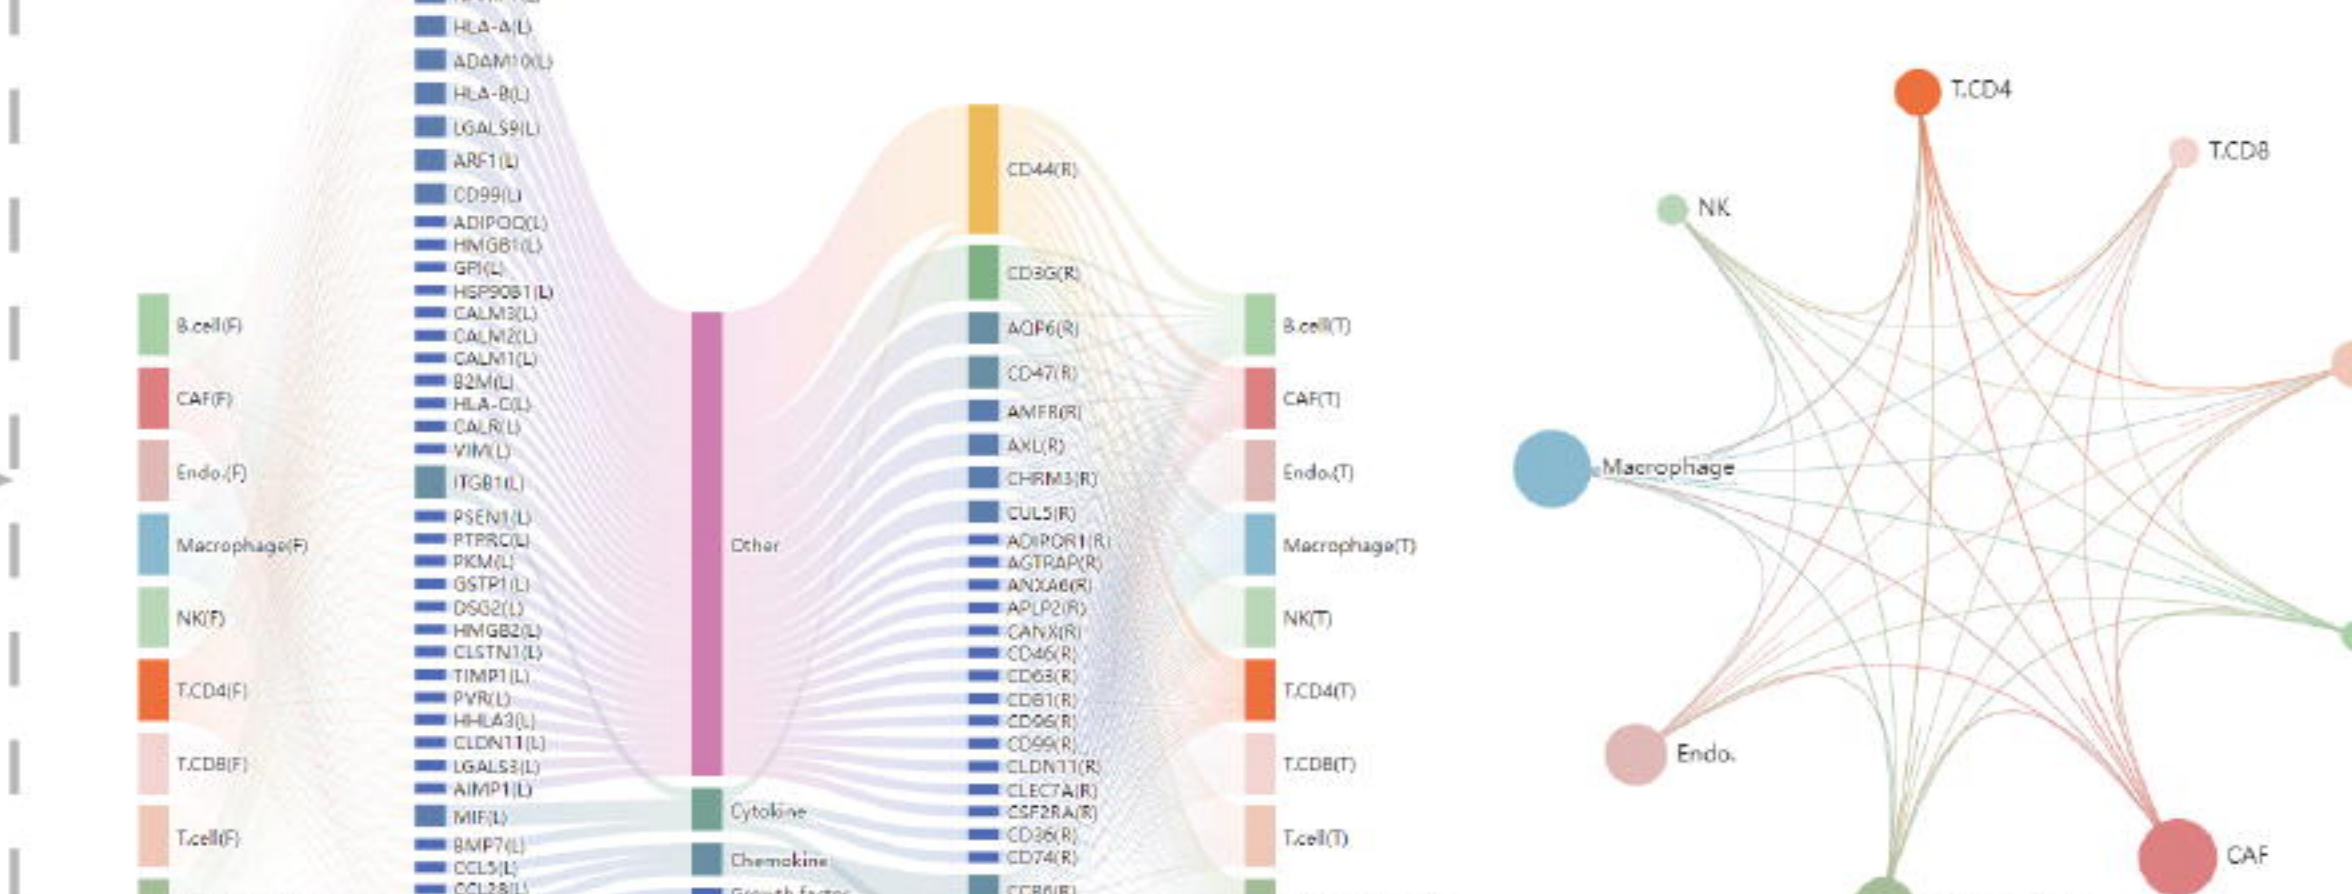

### Robustness evaluation

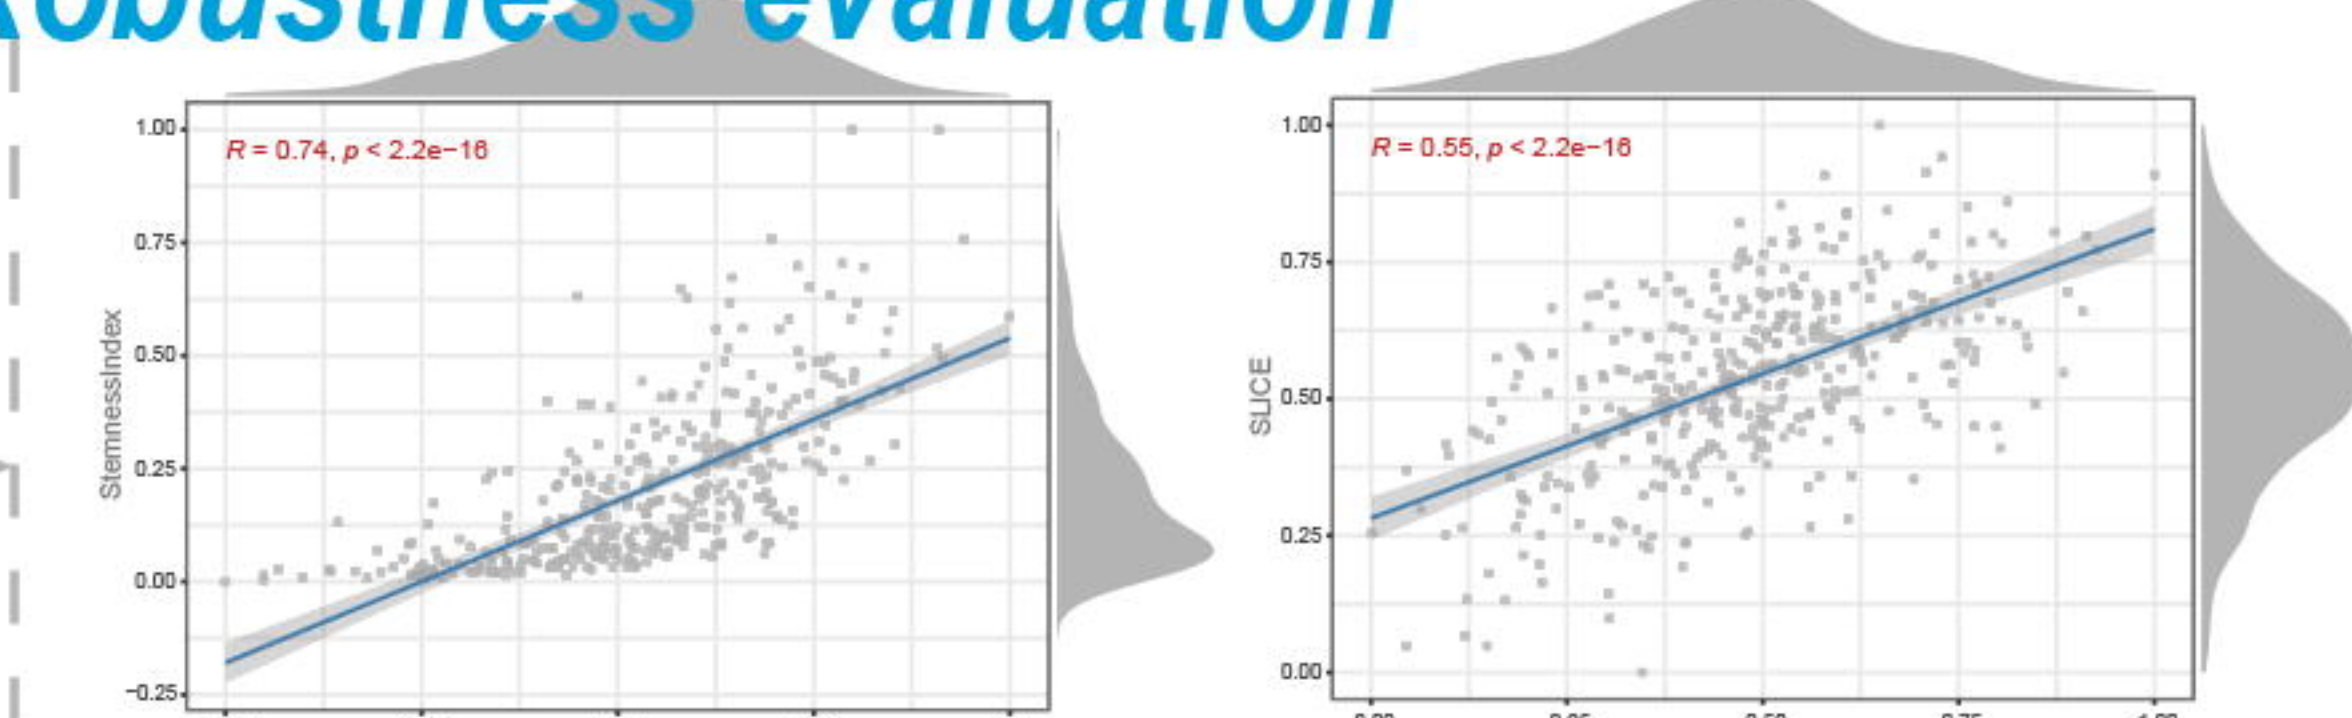

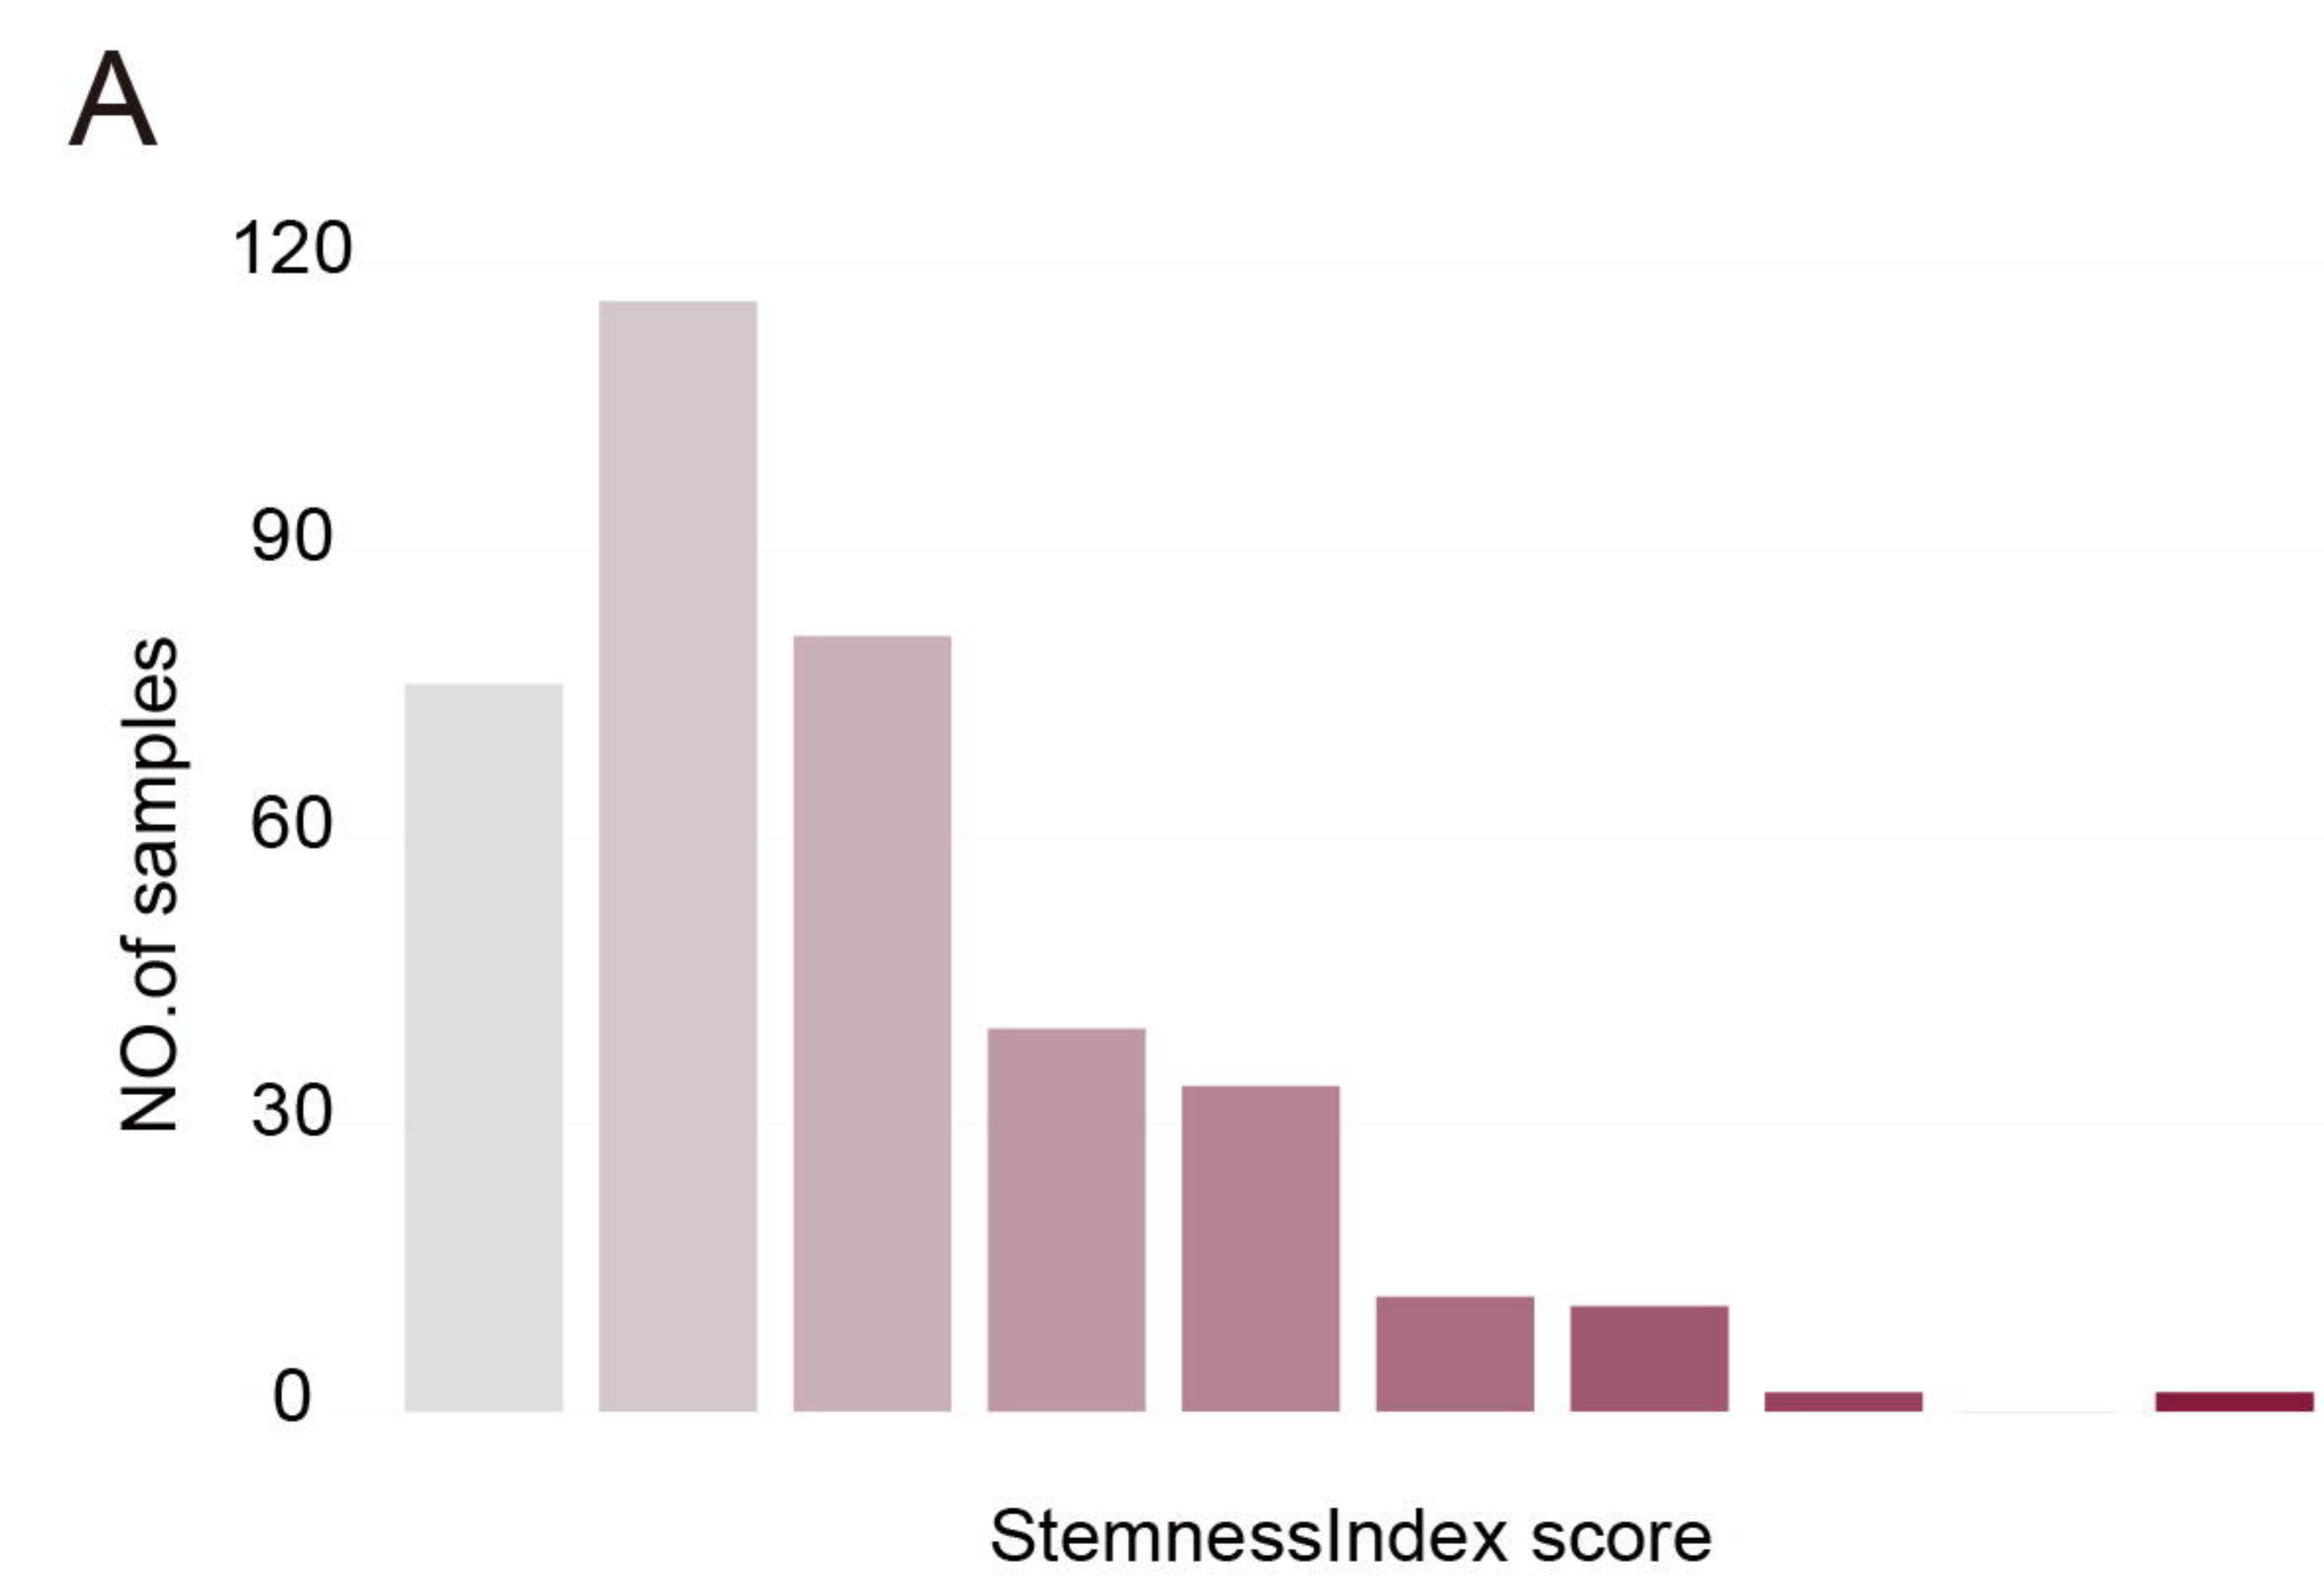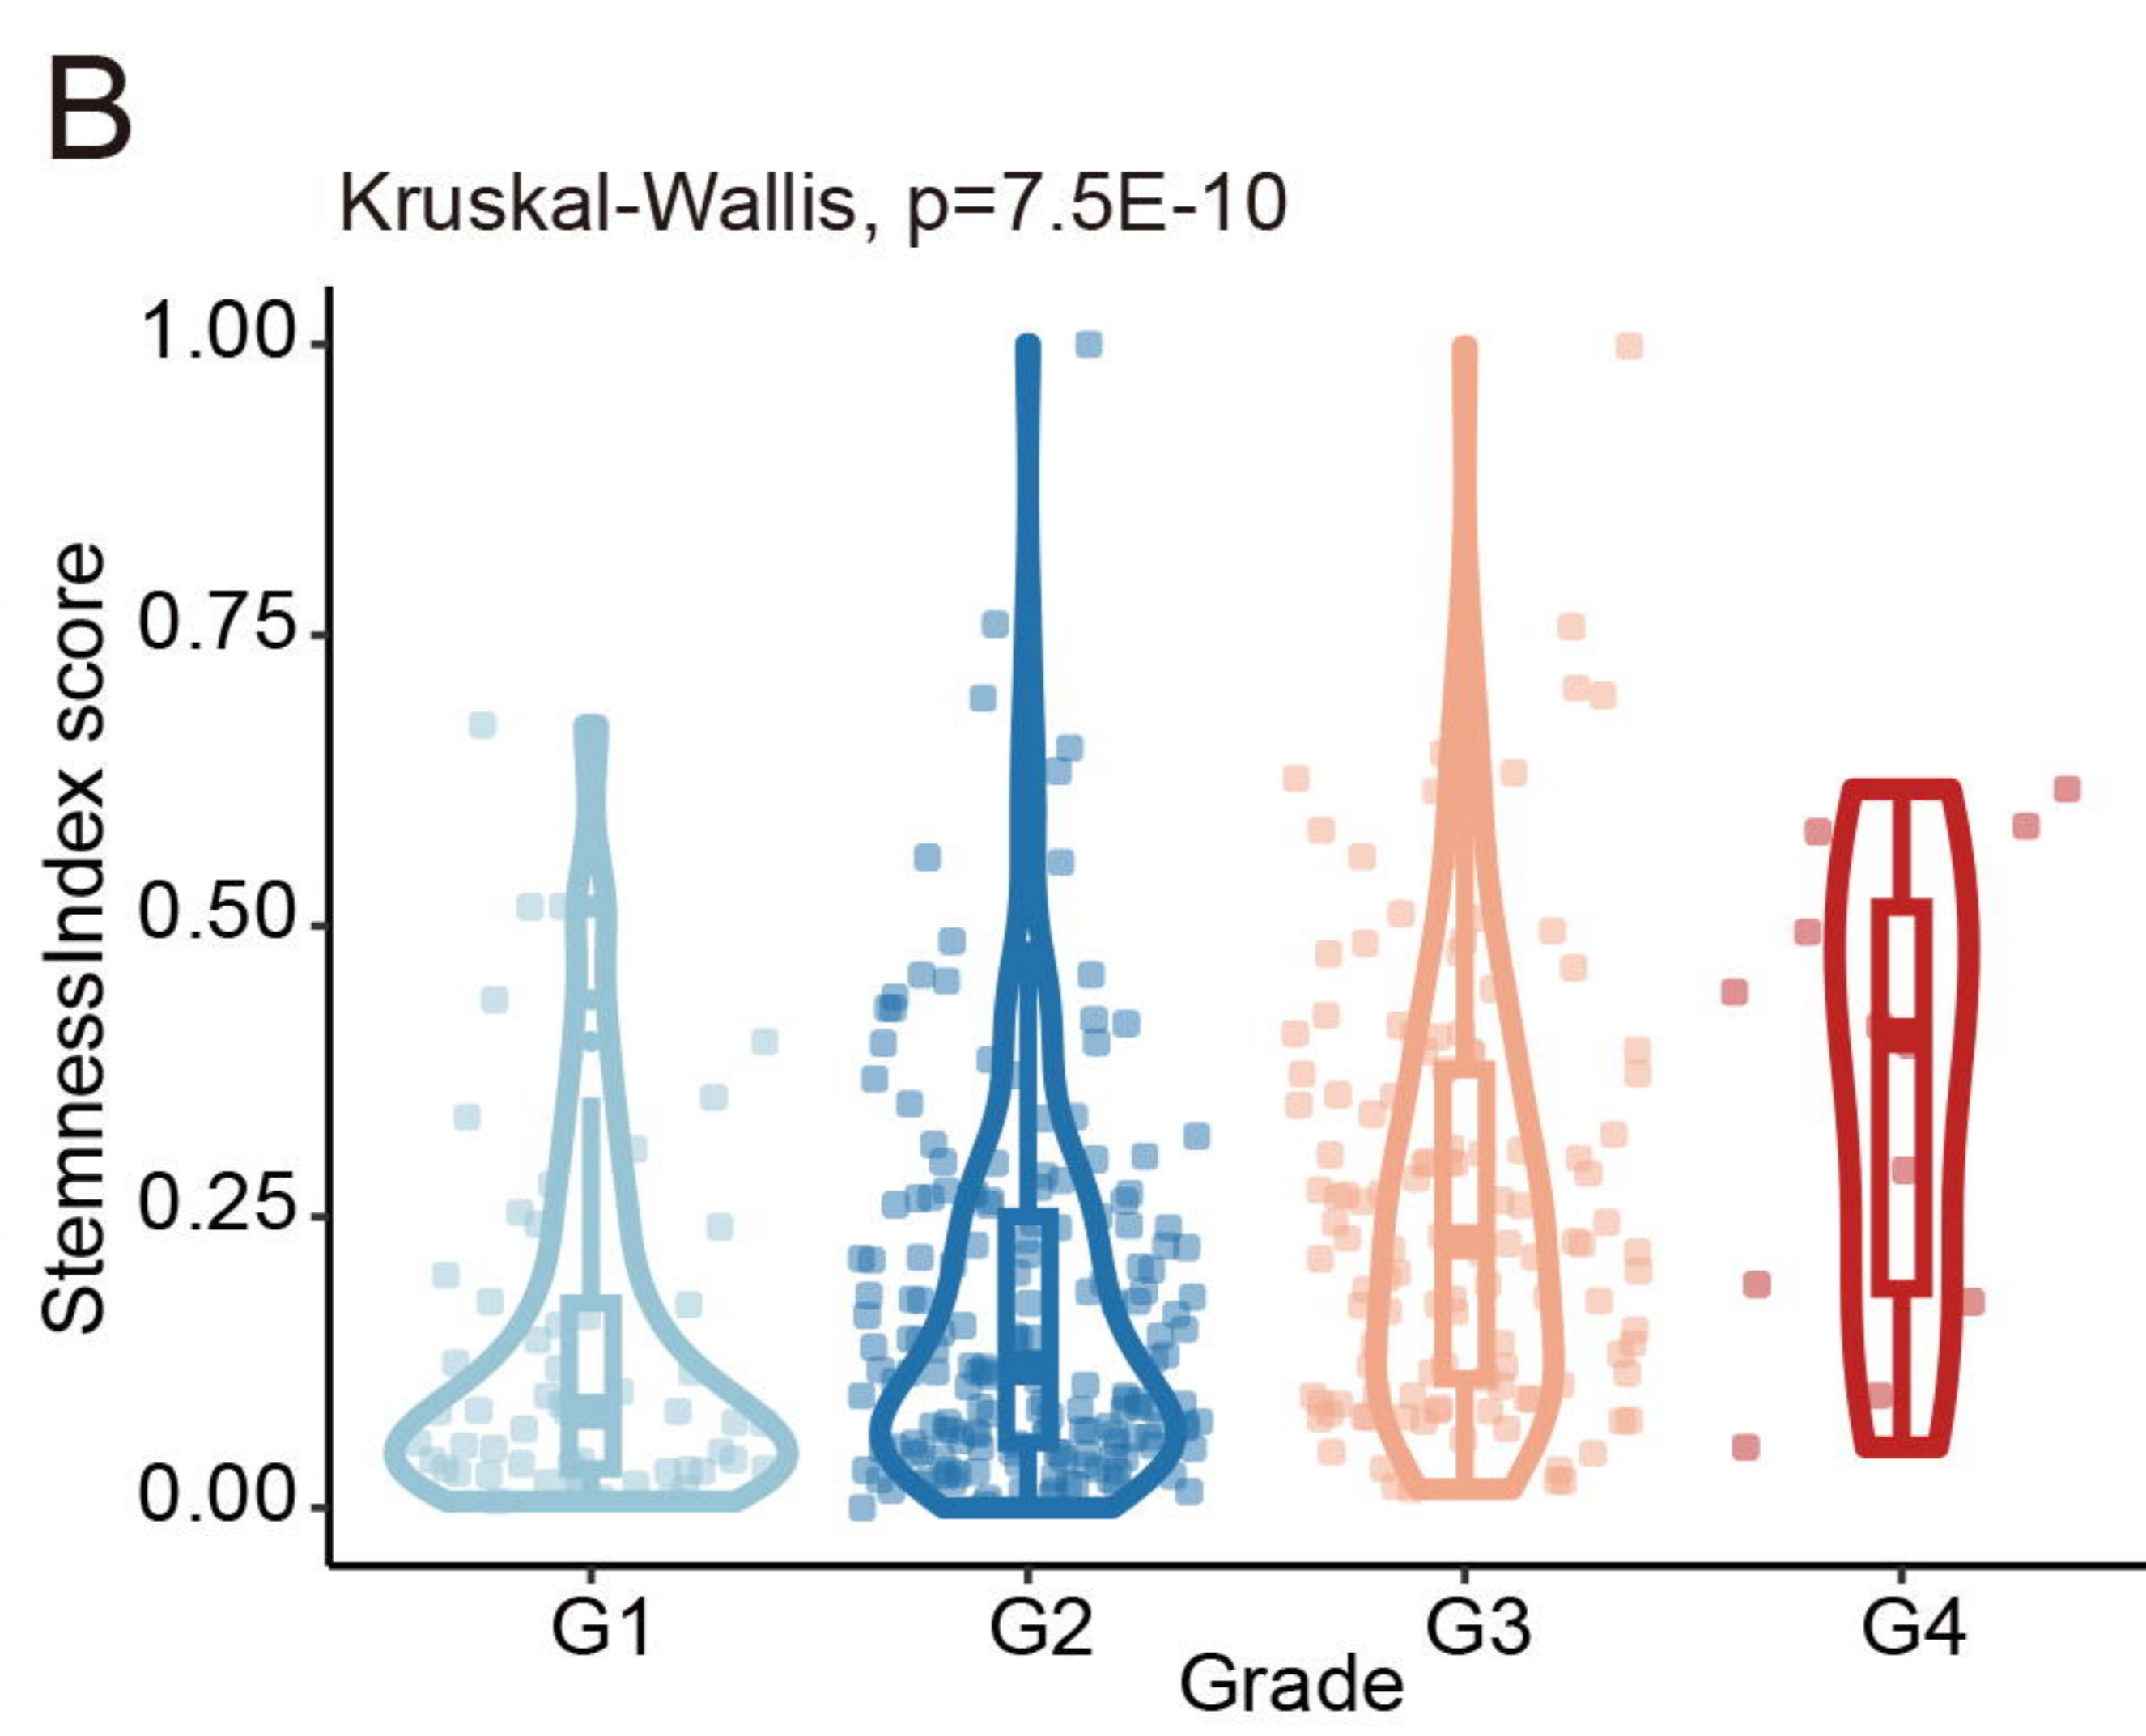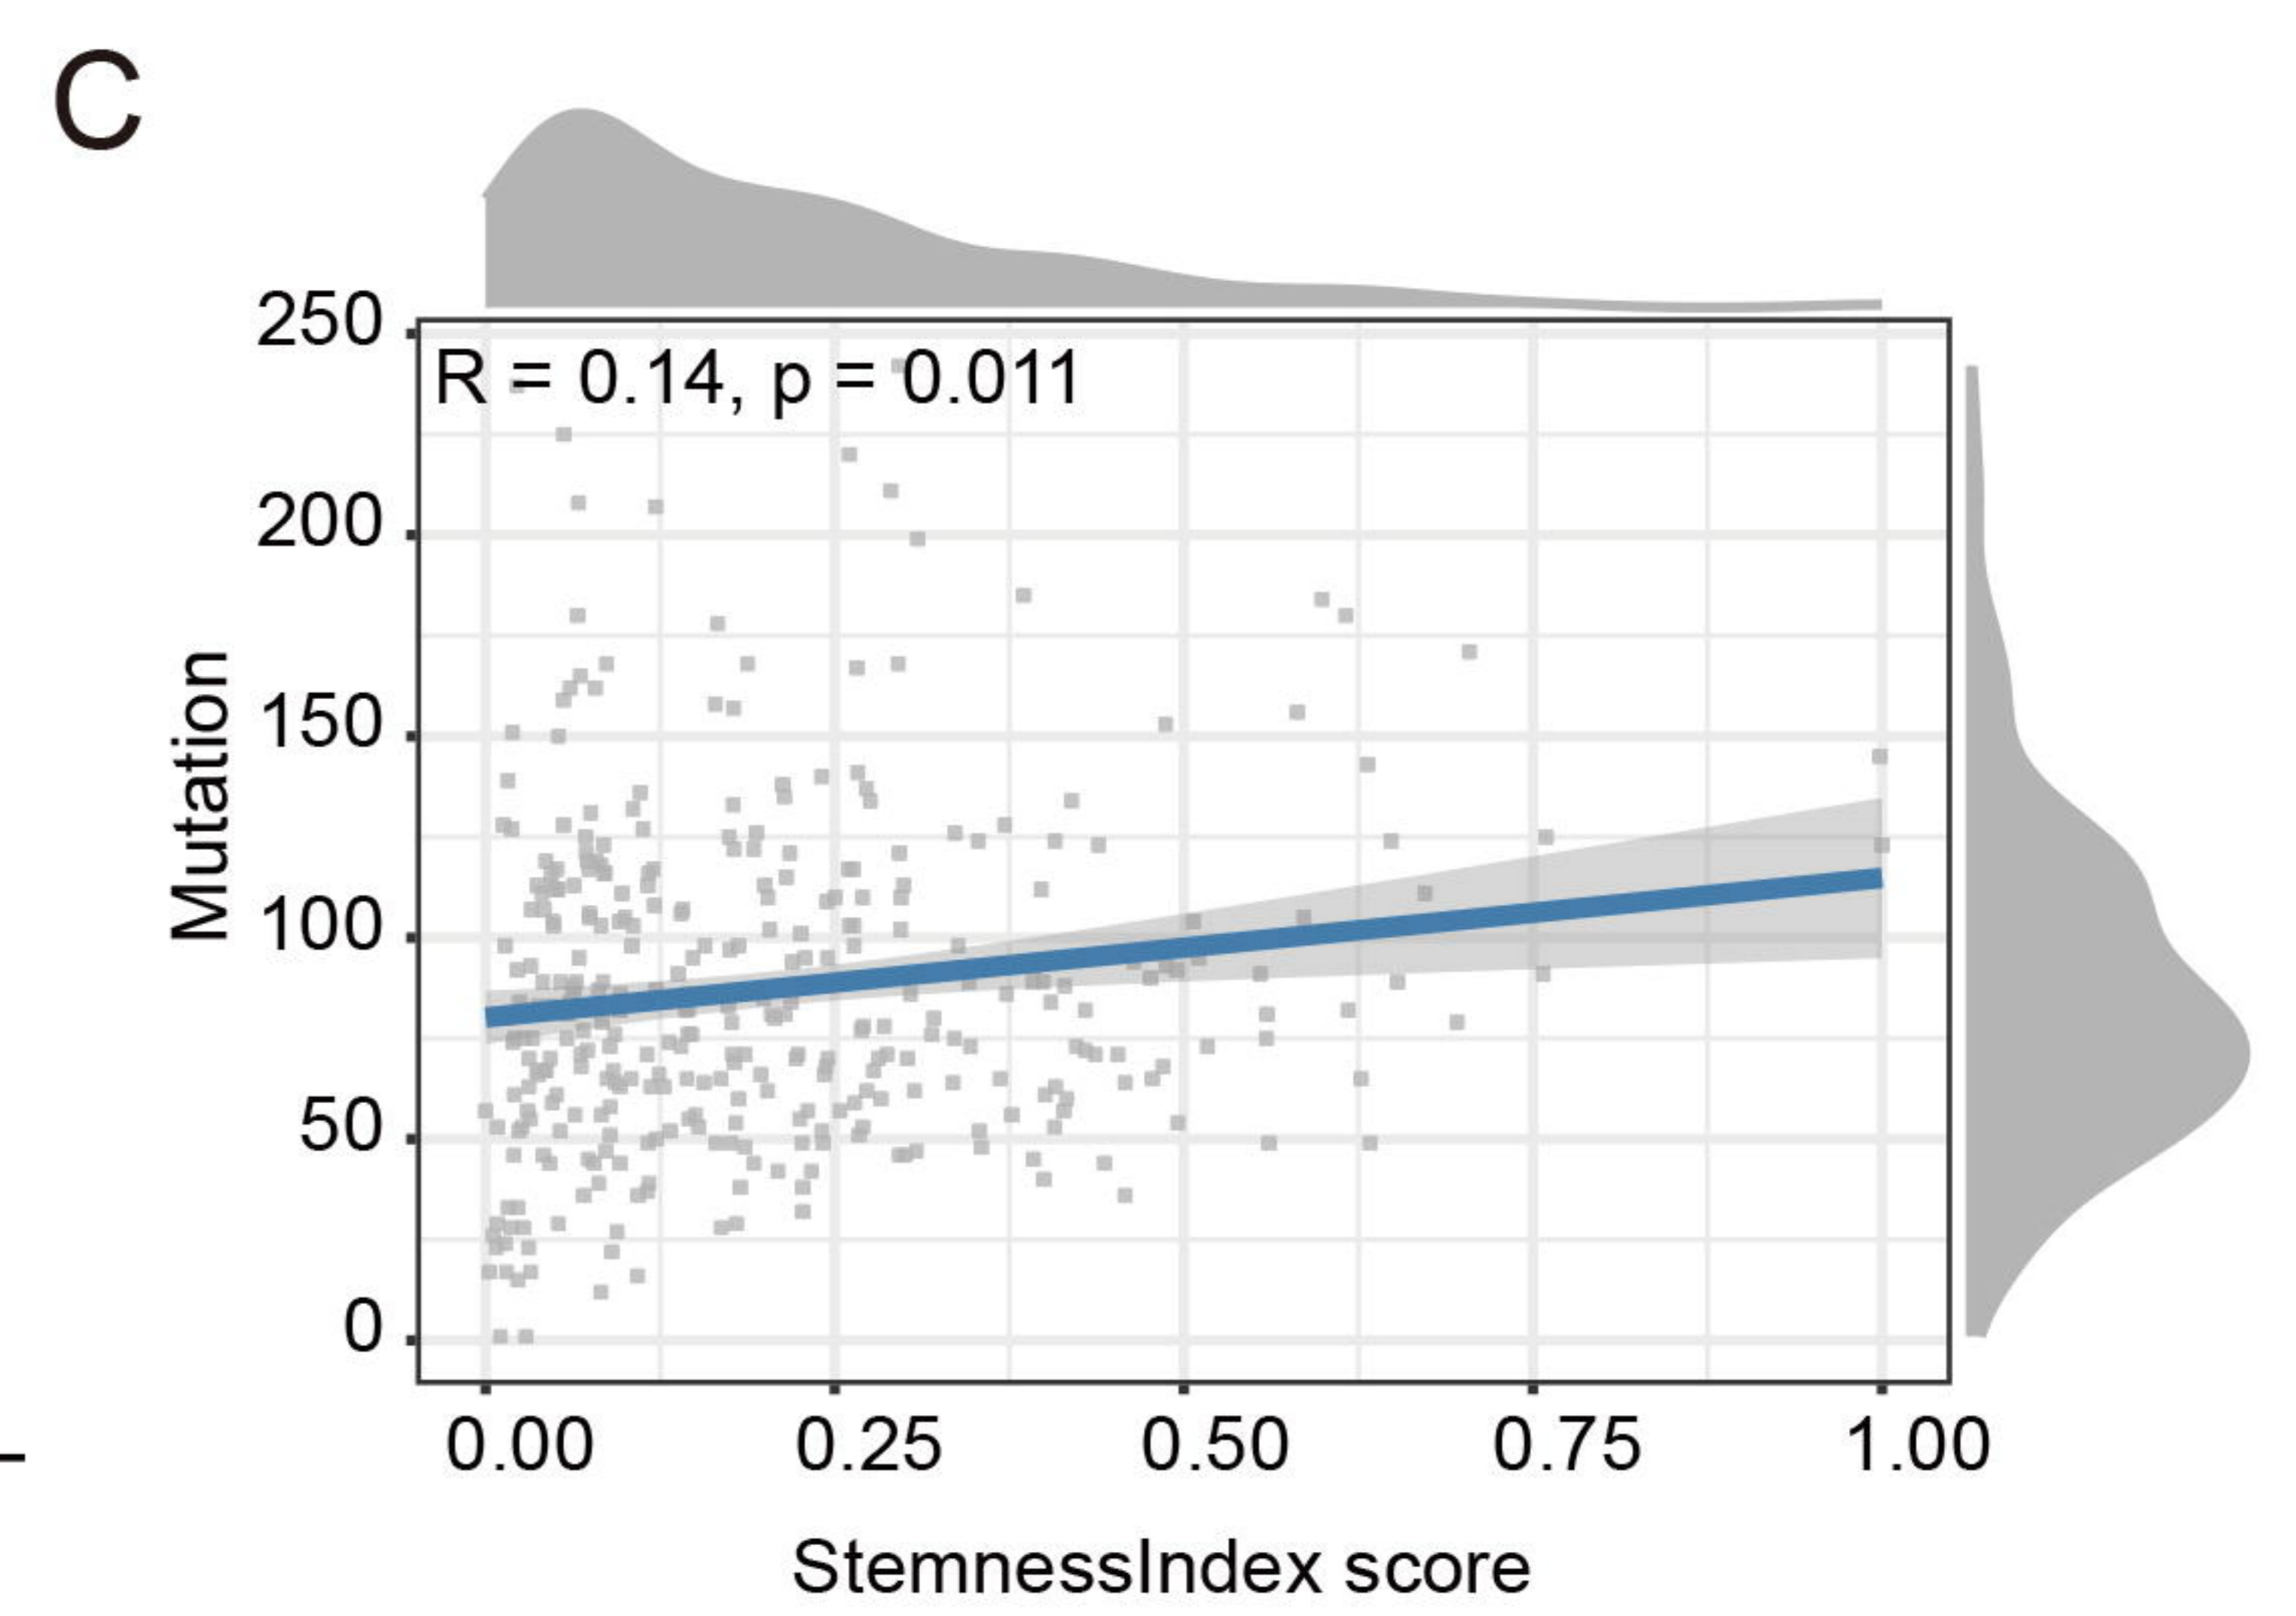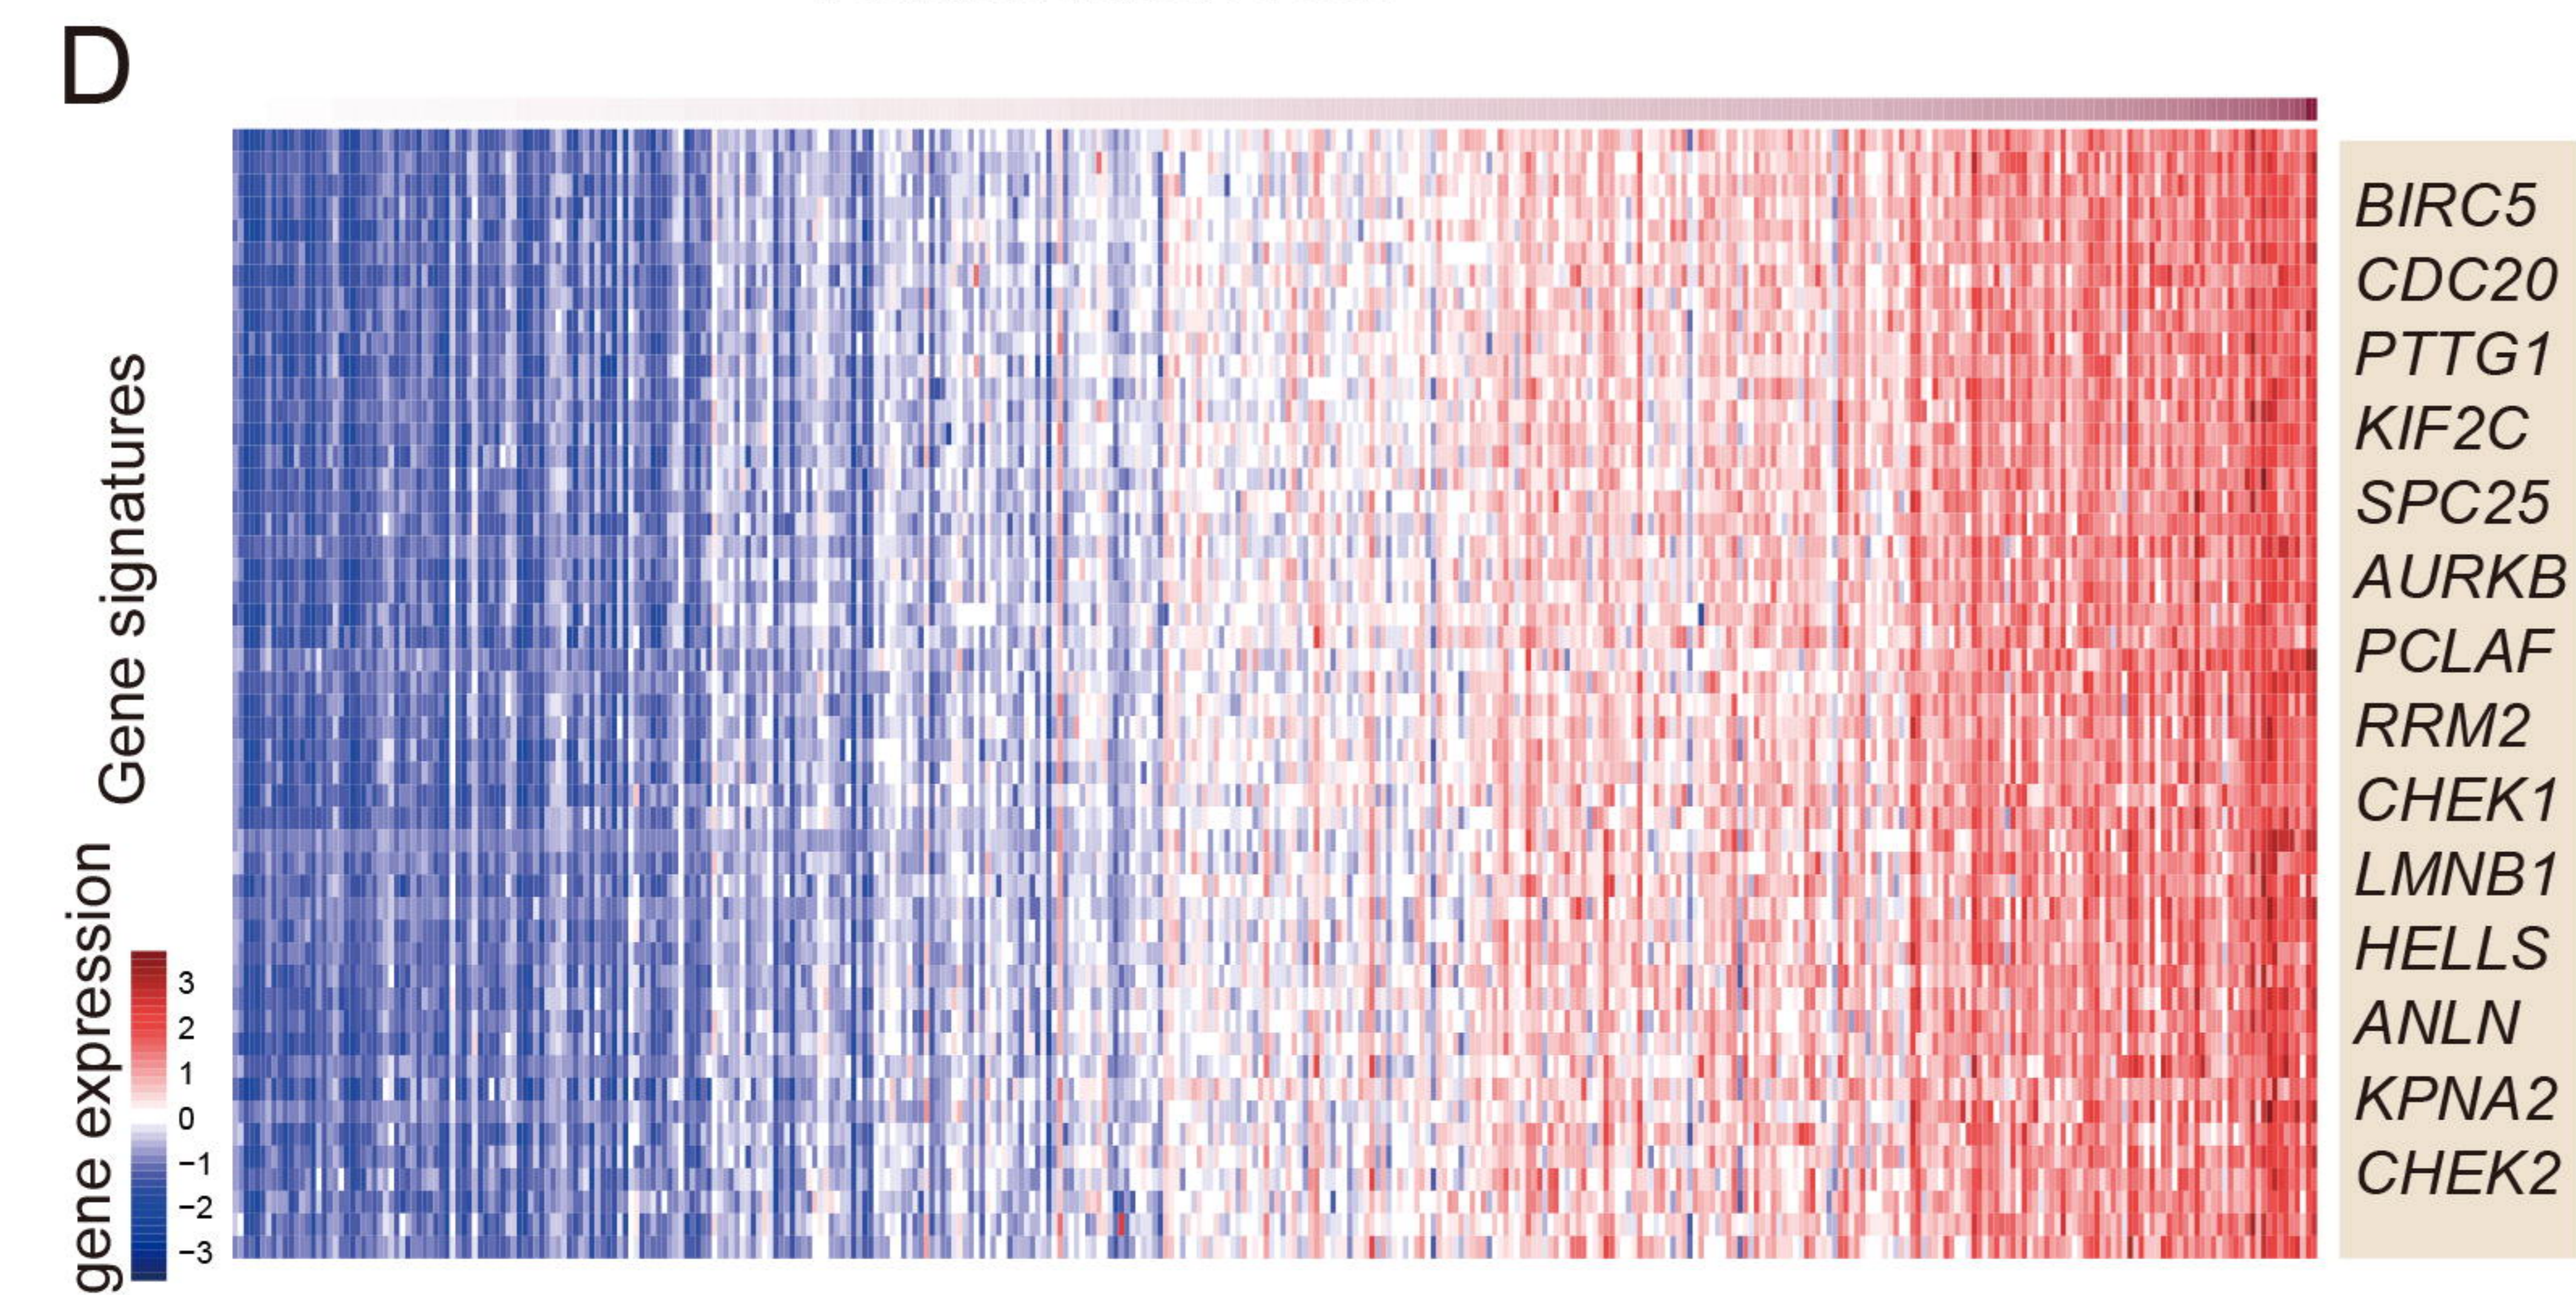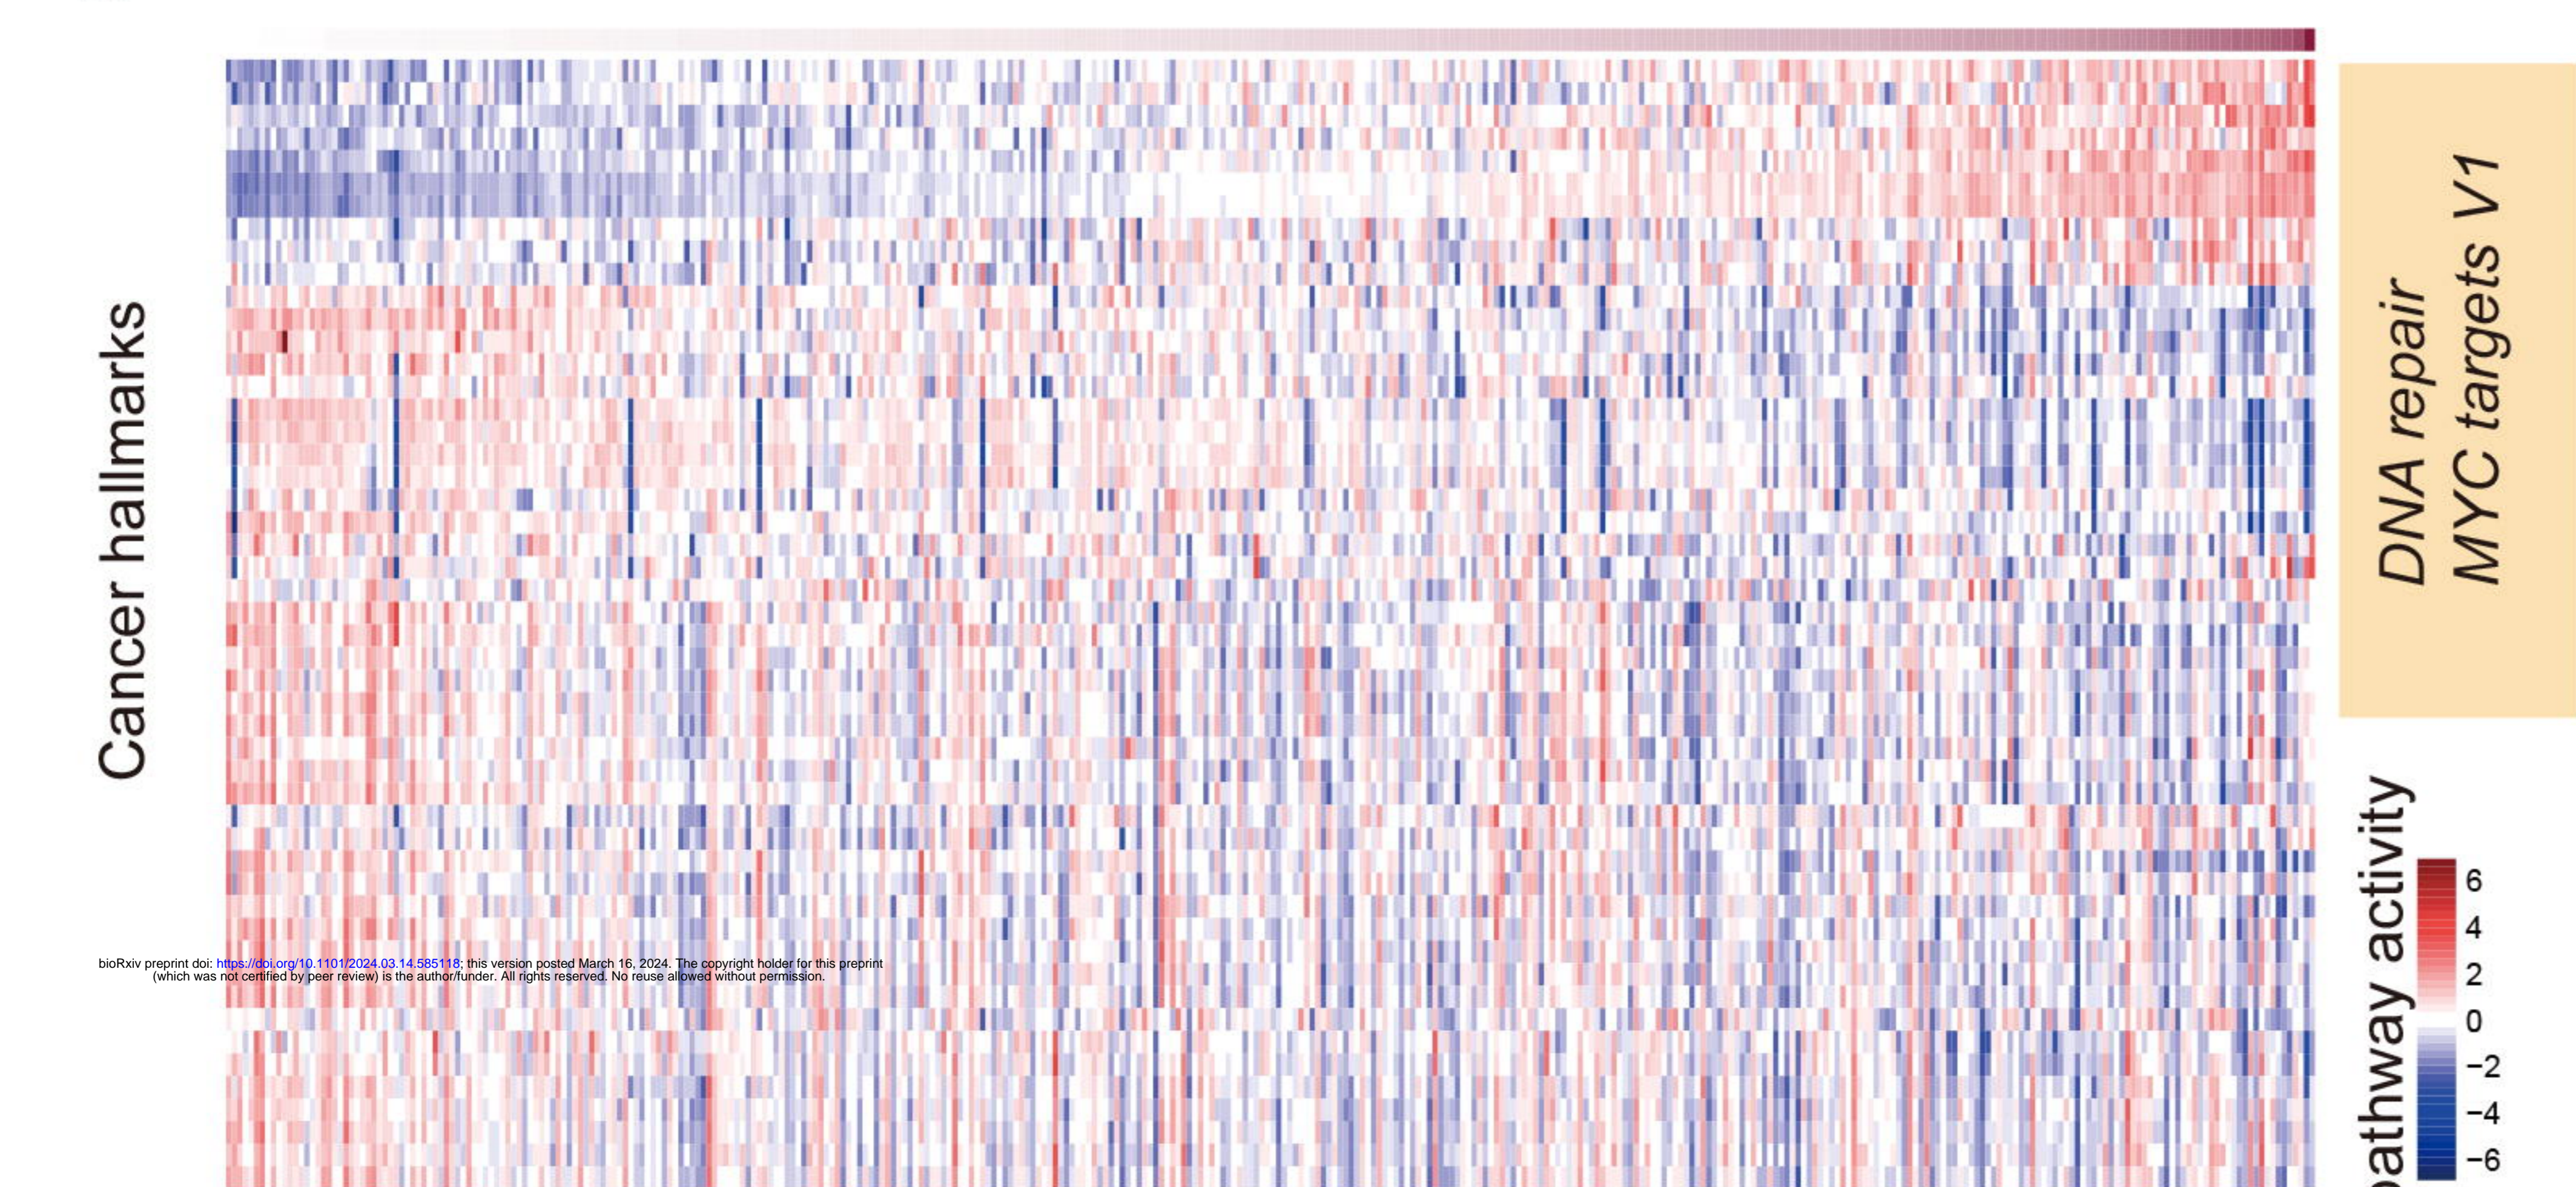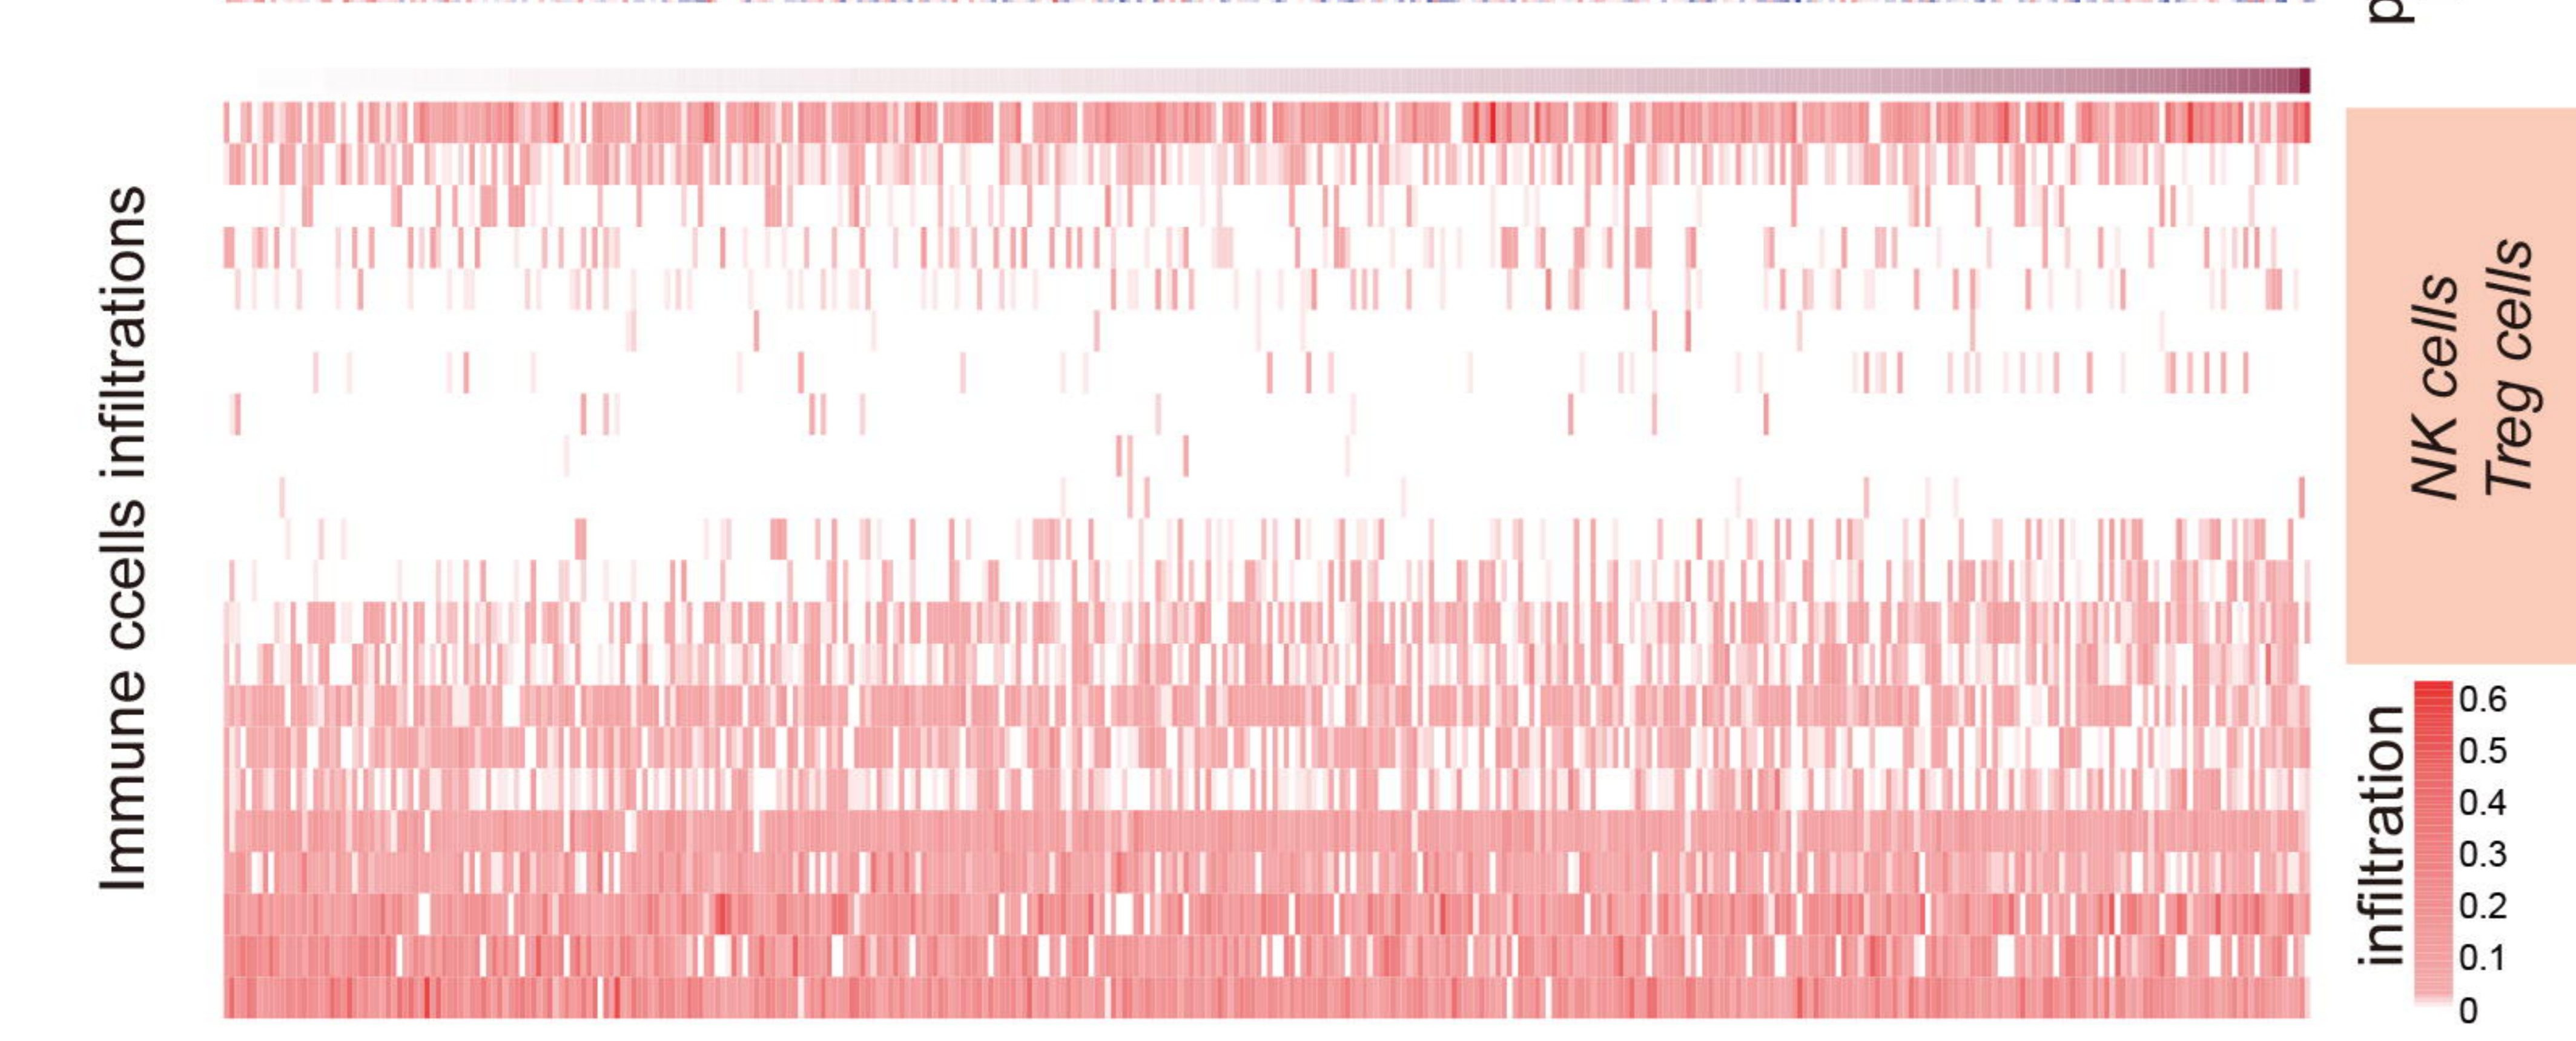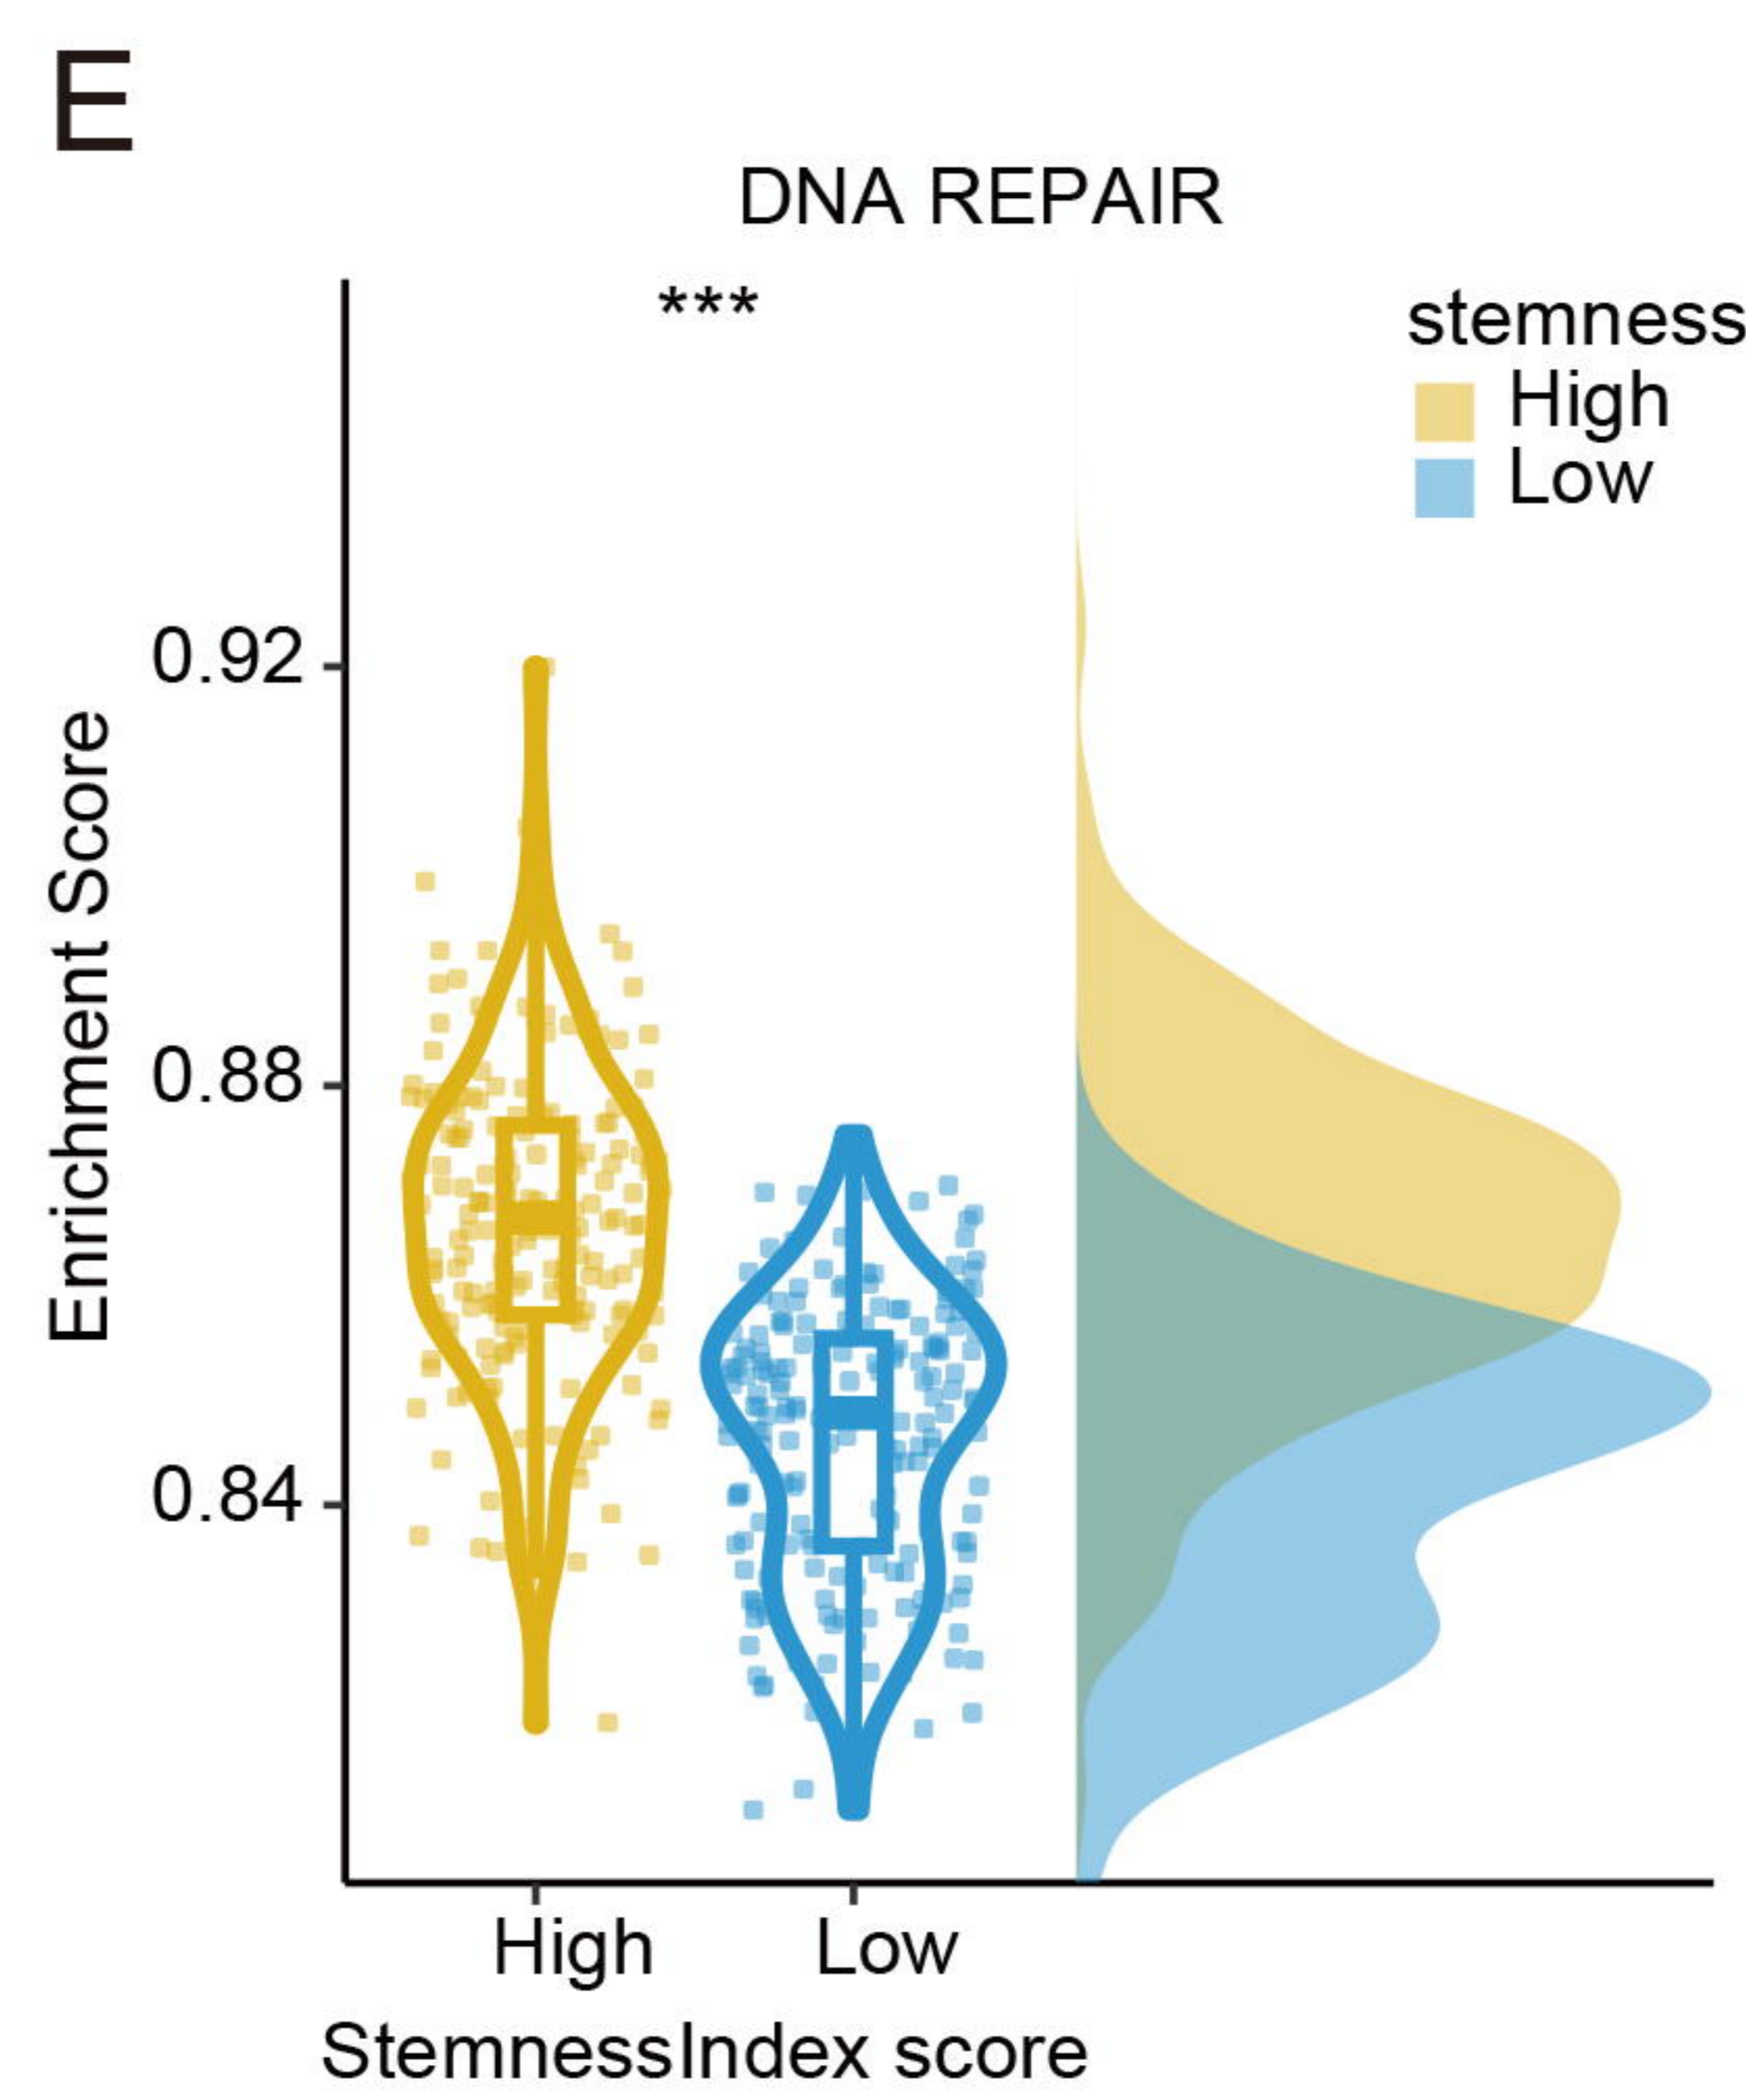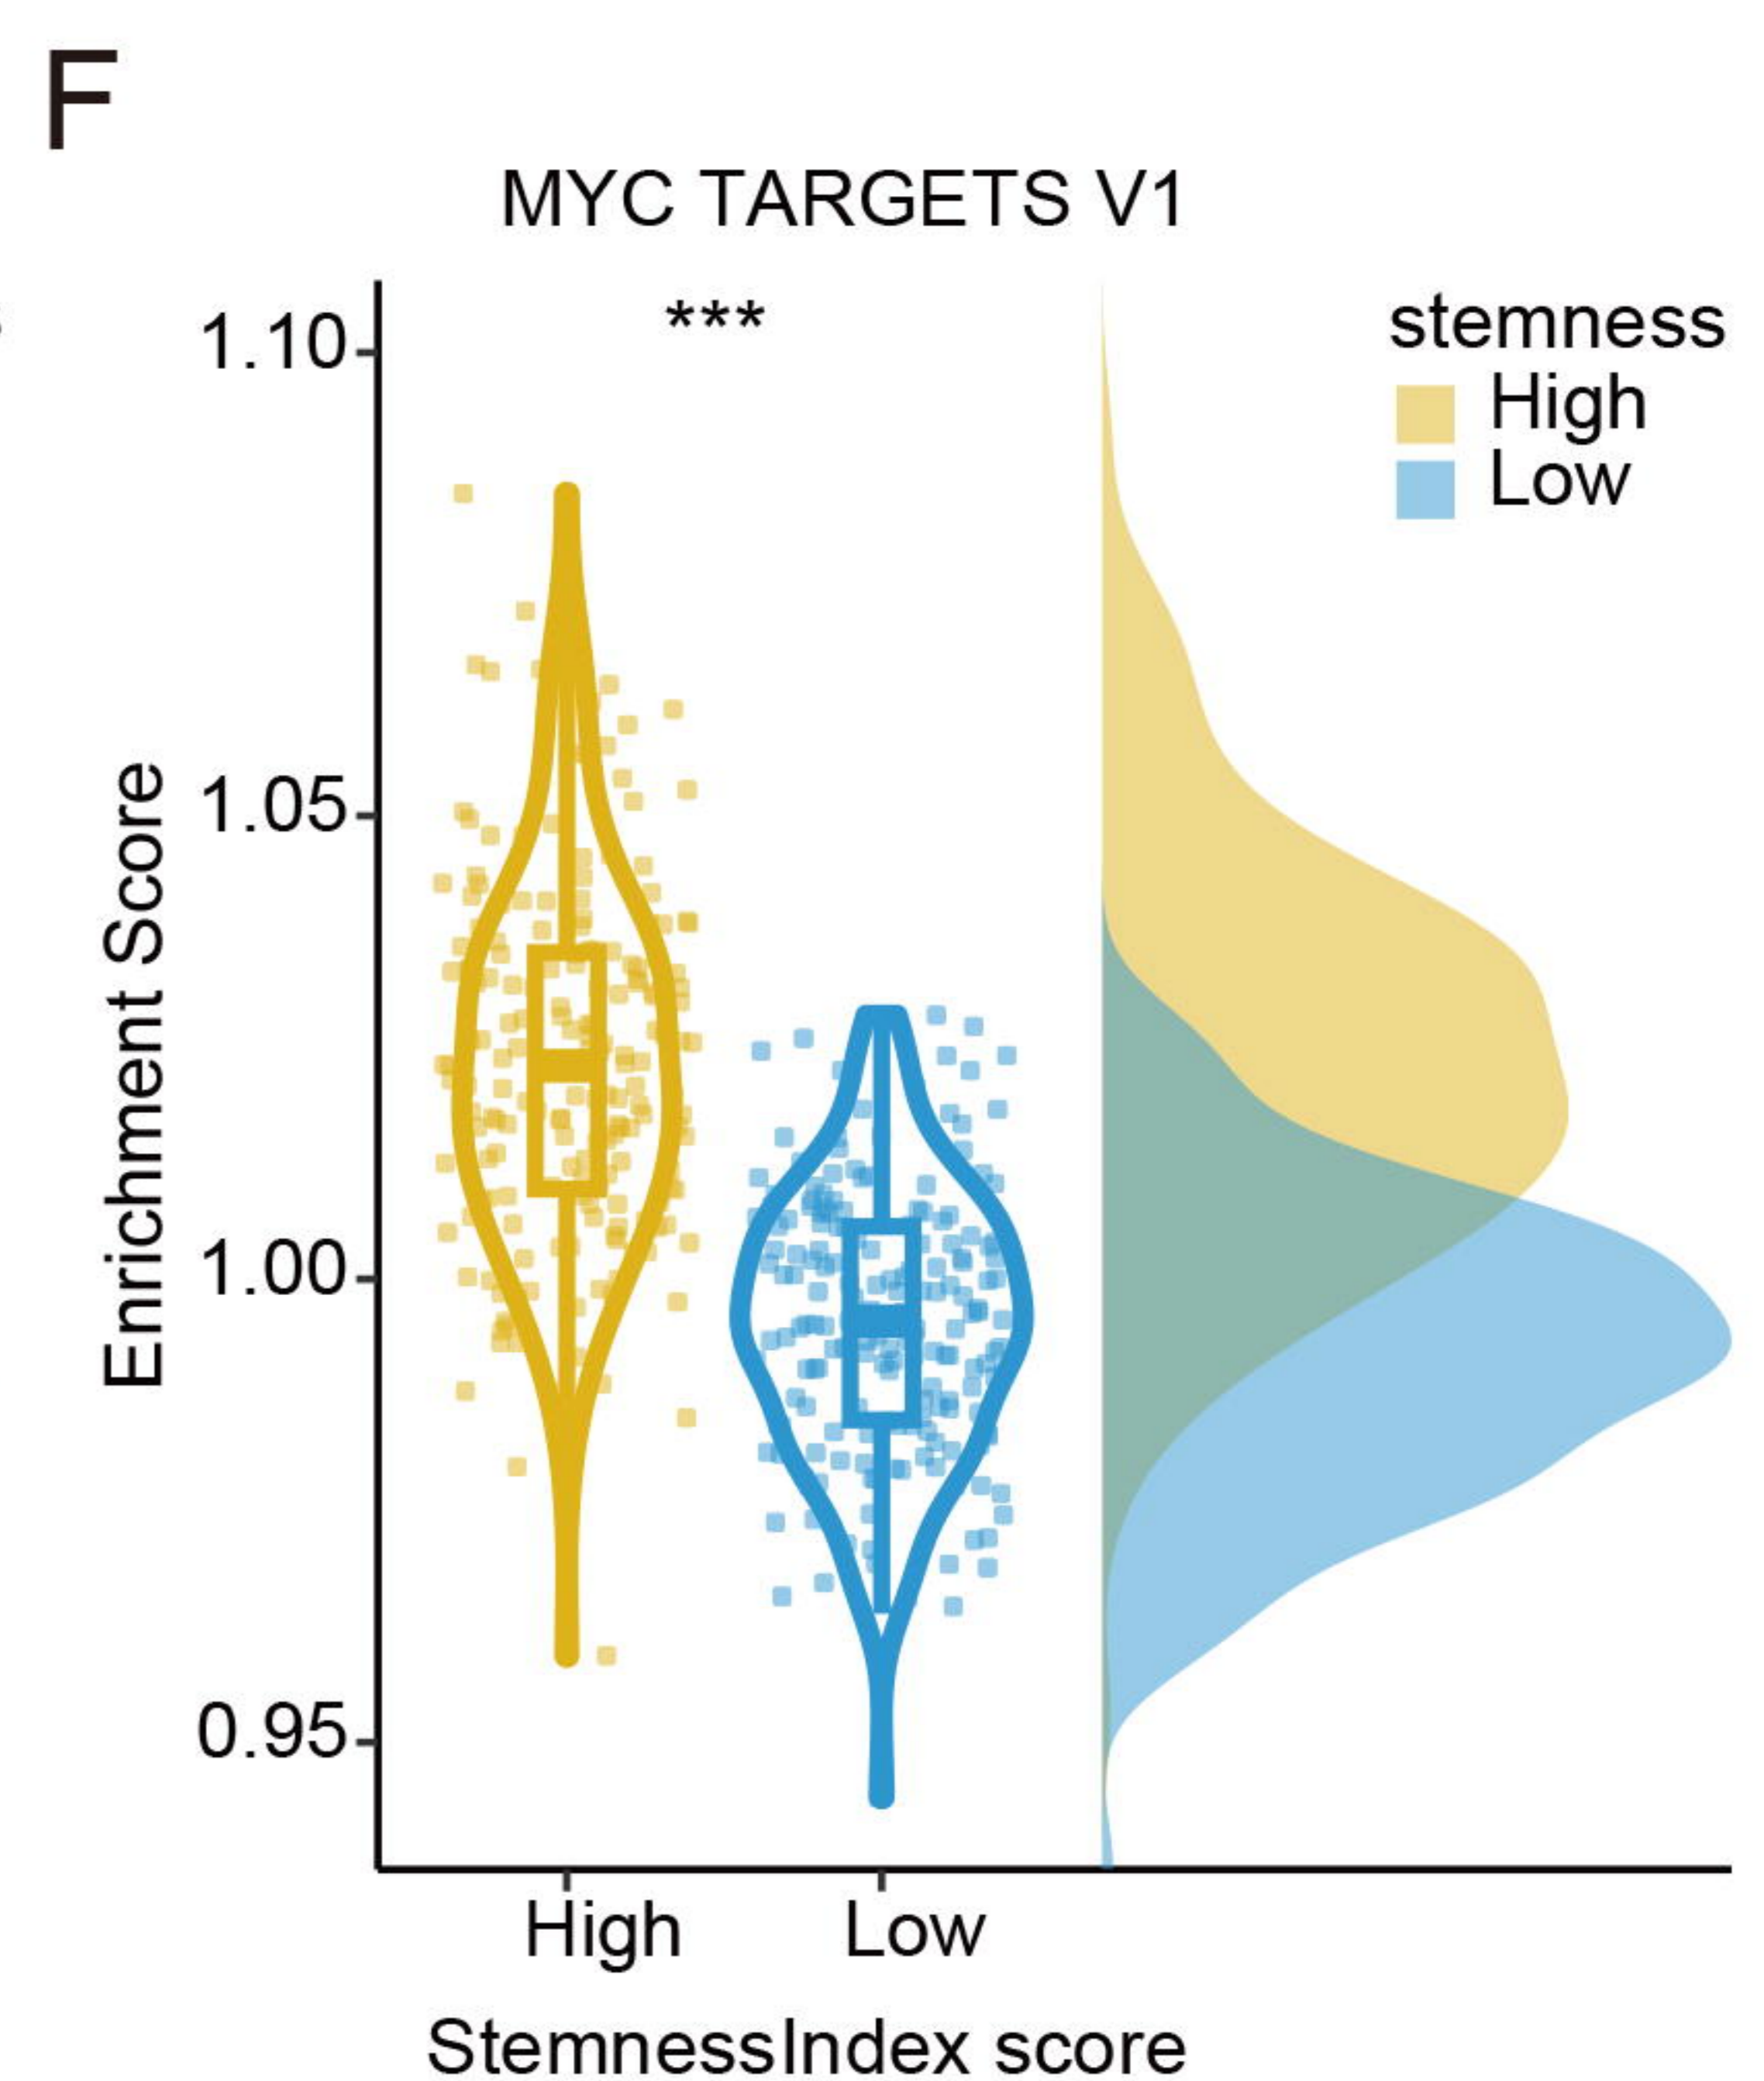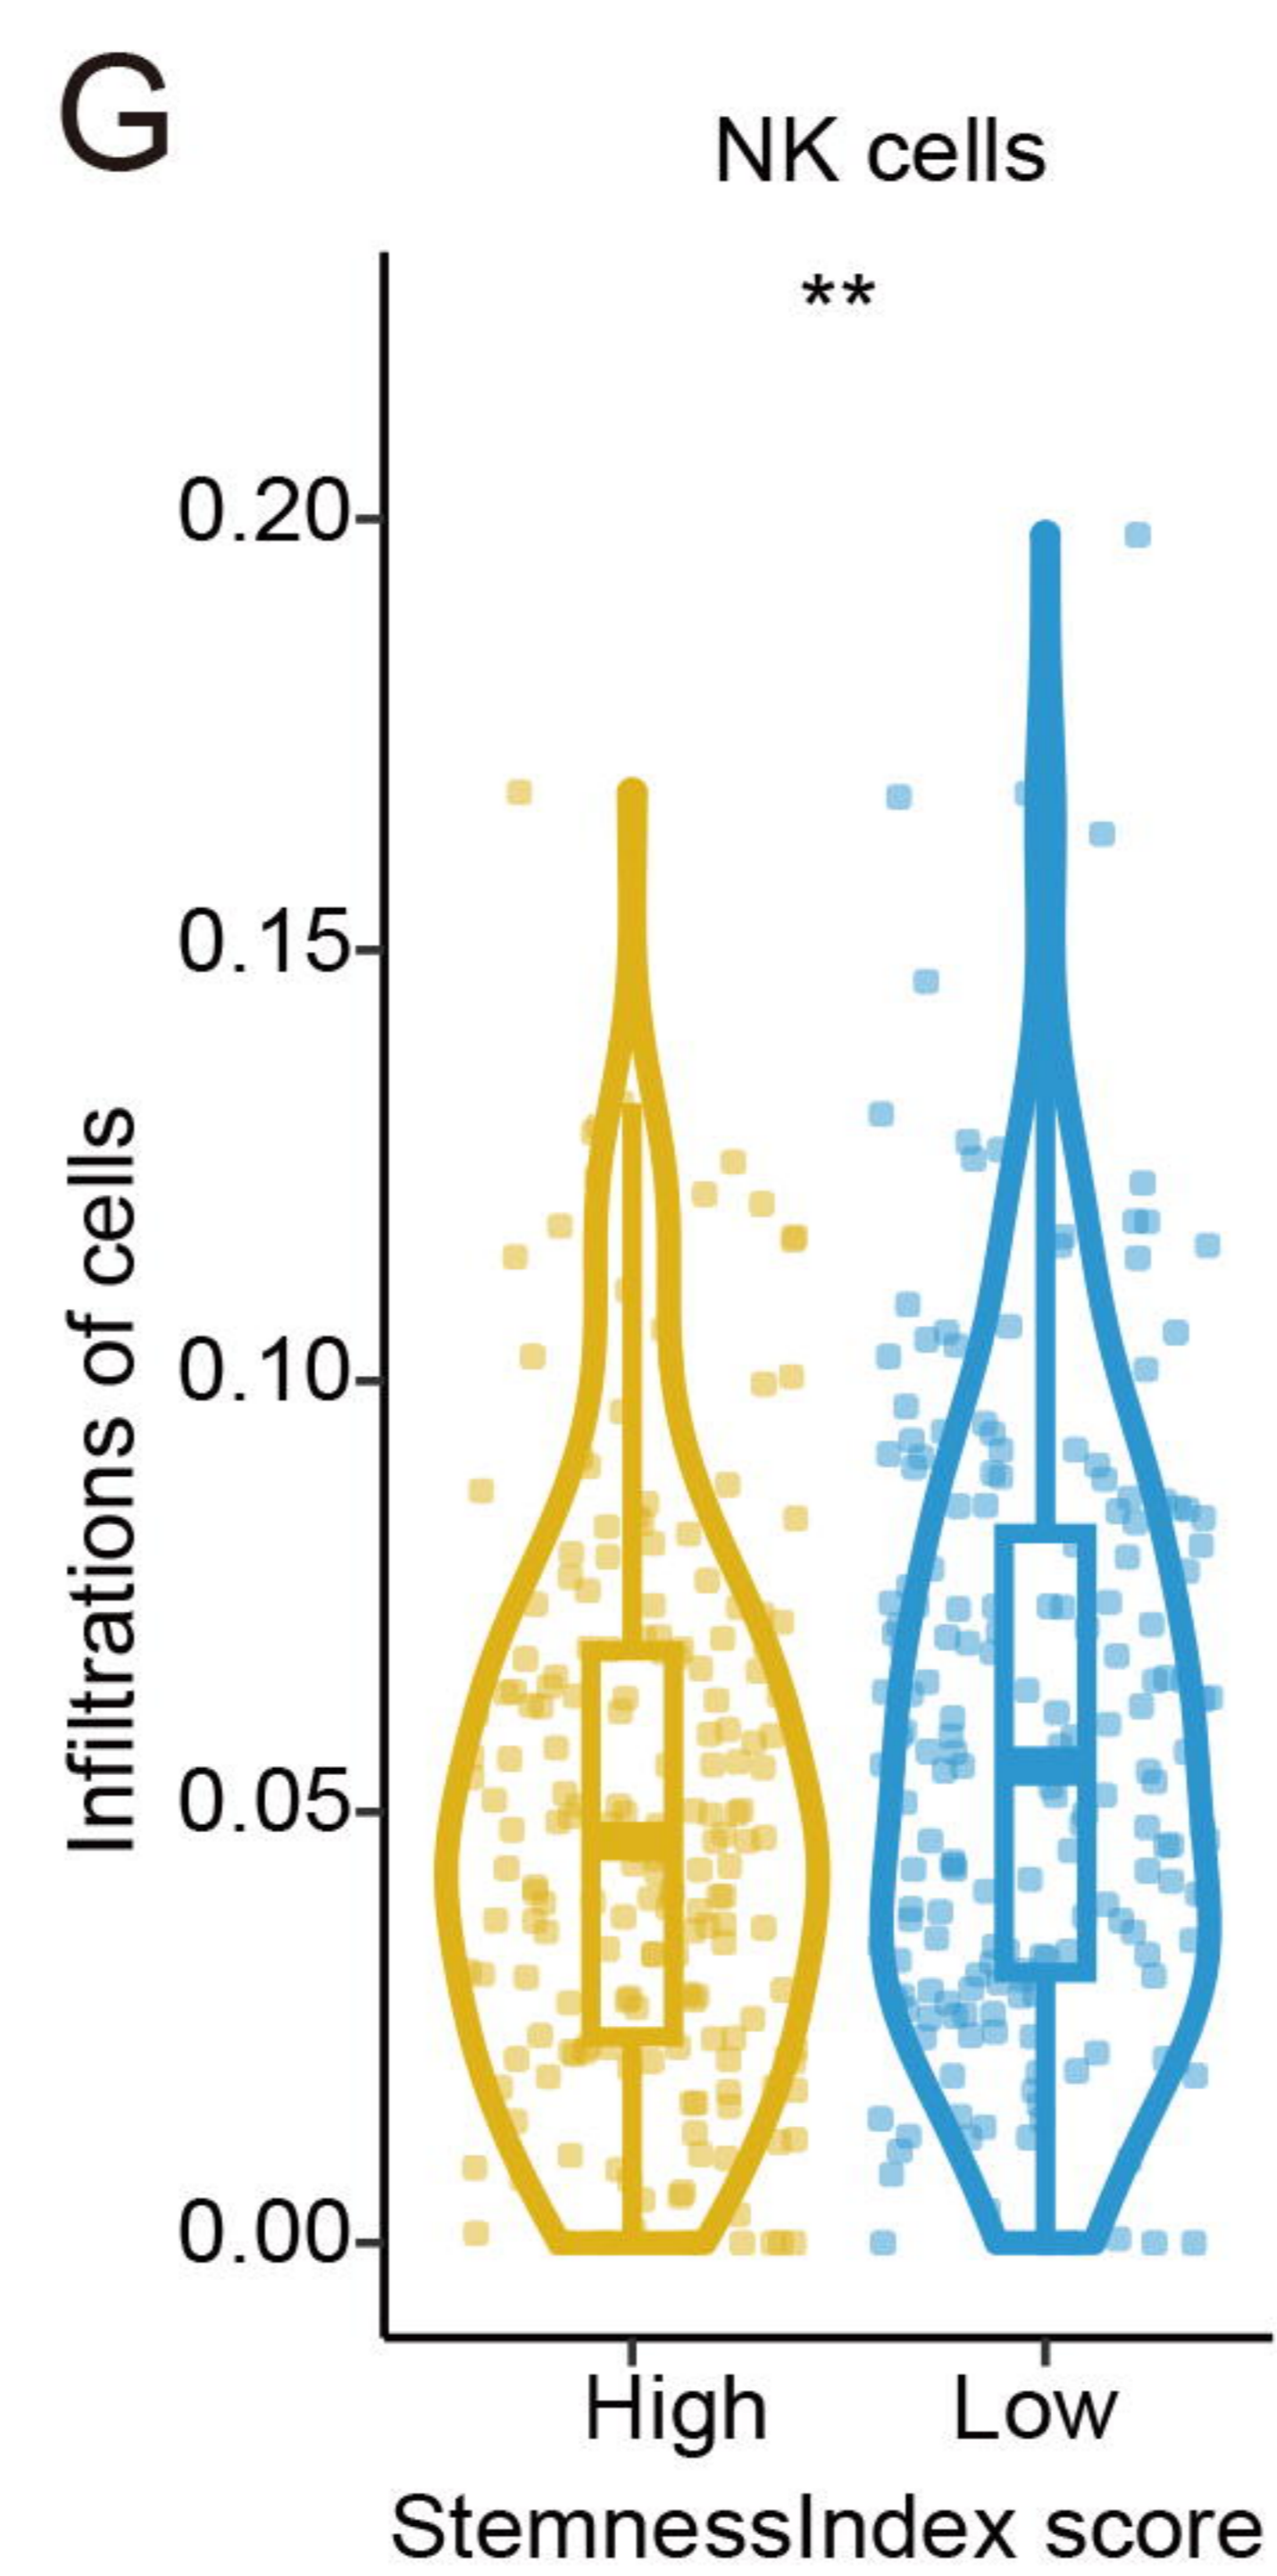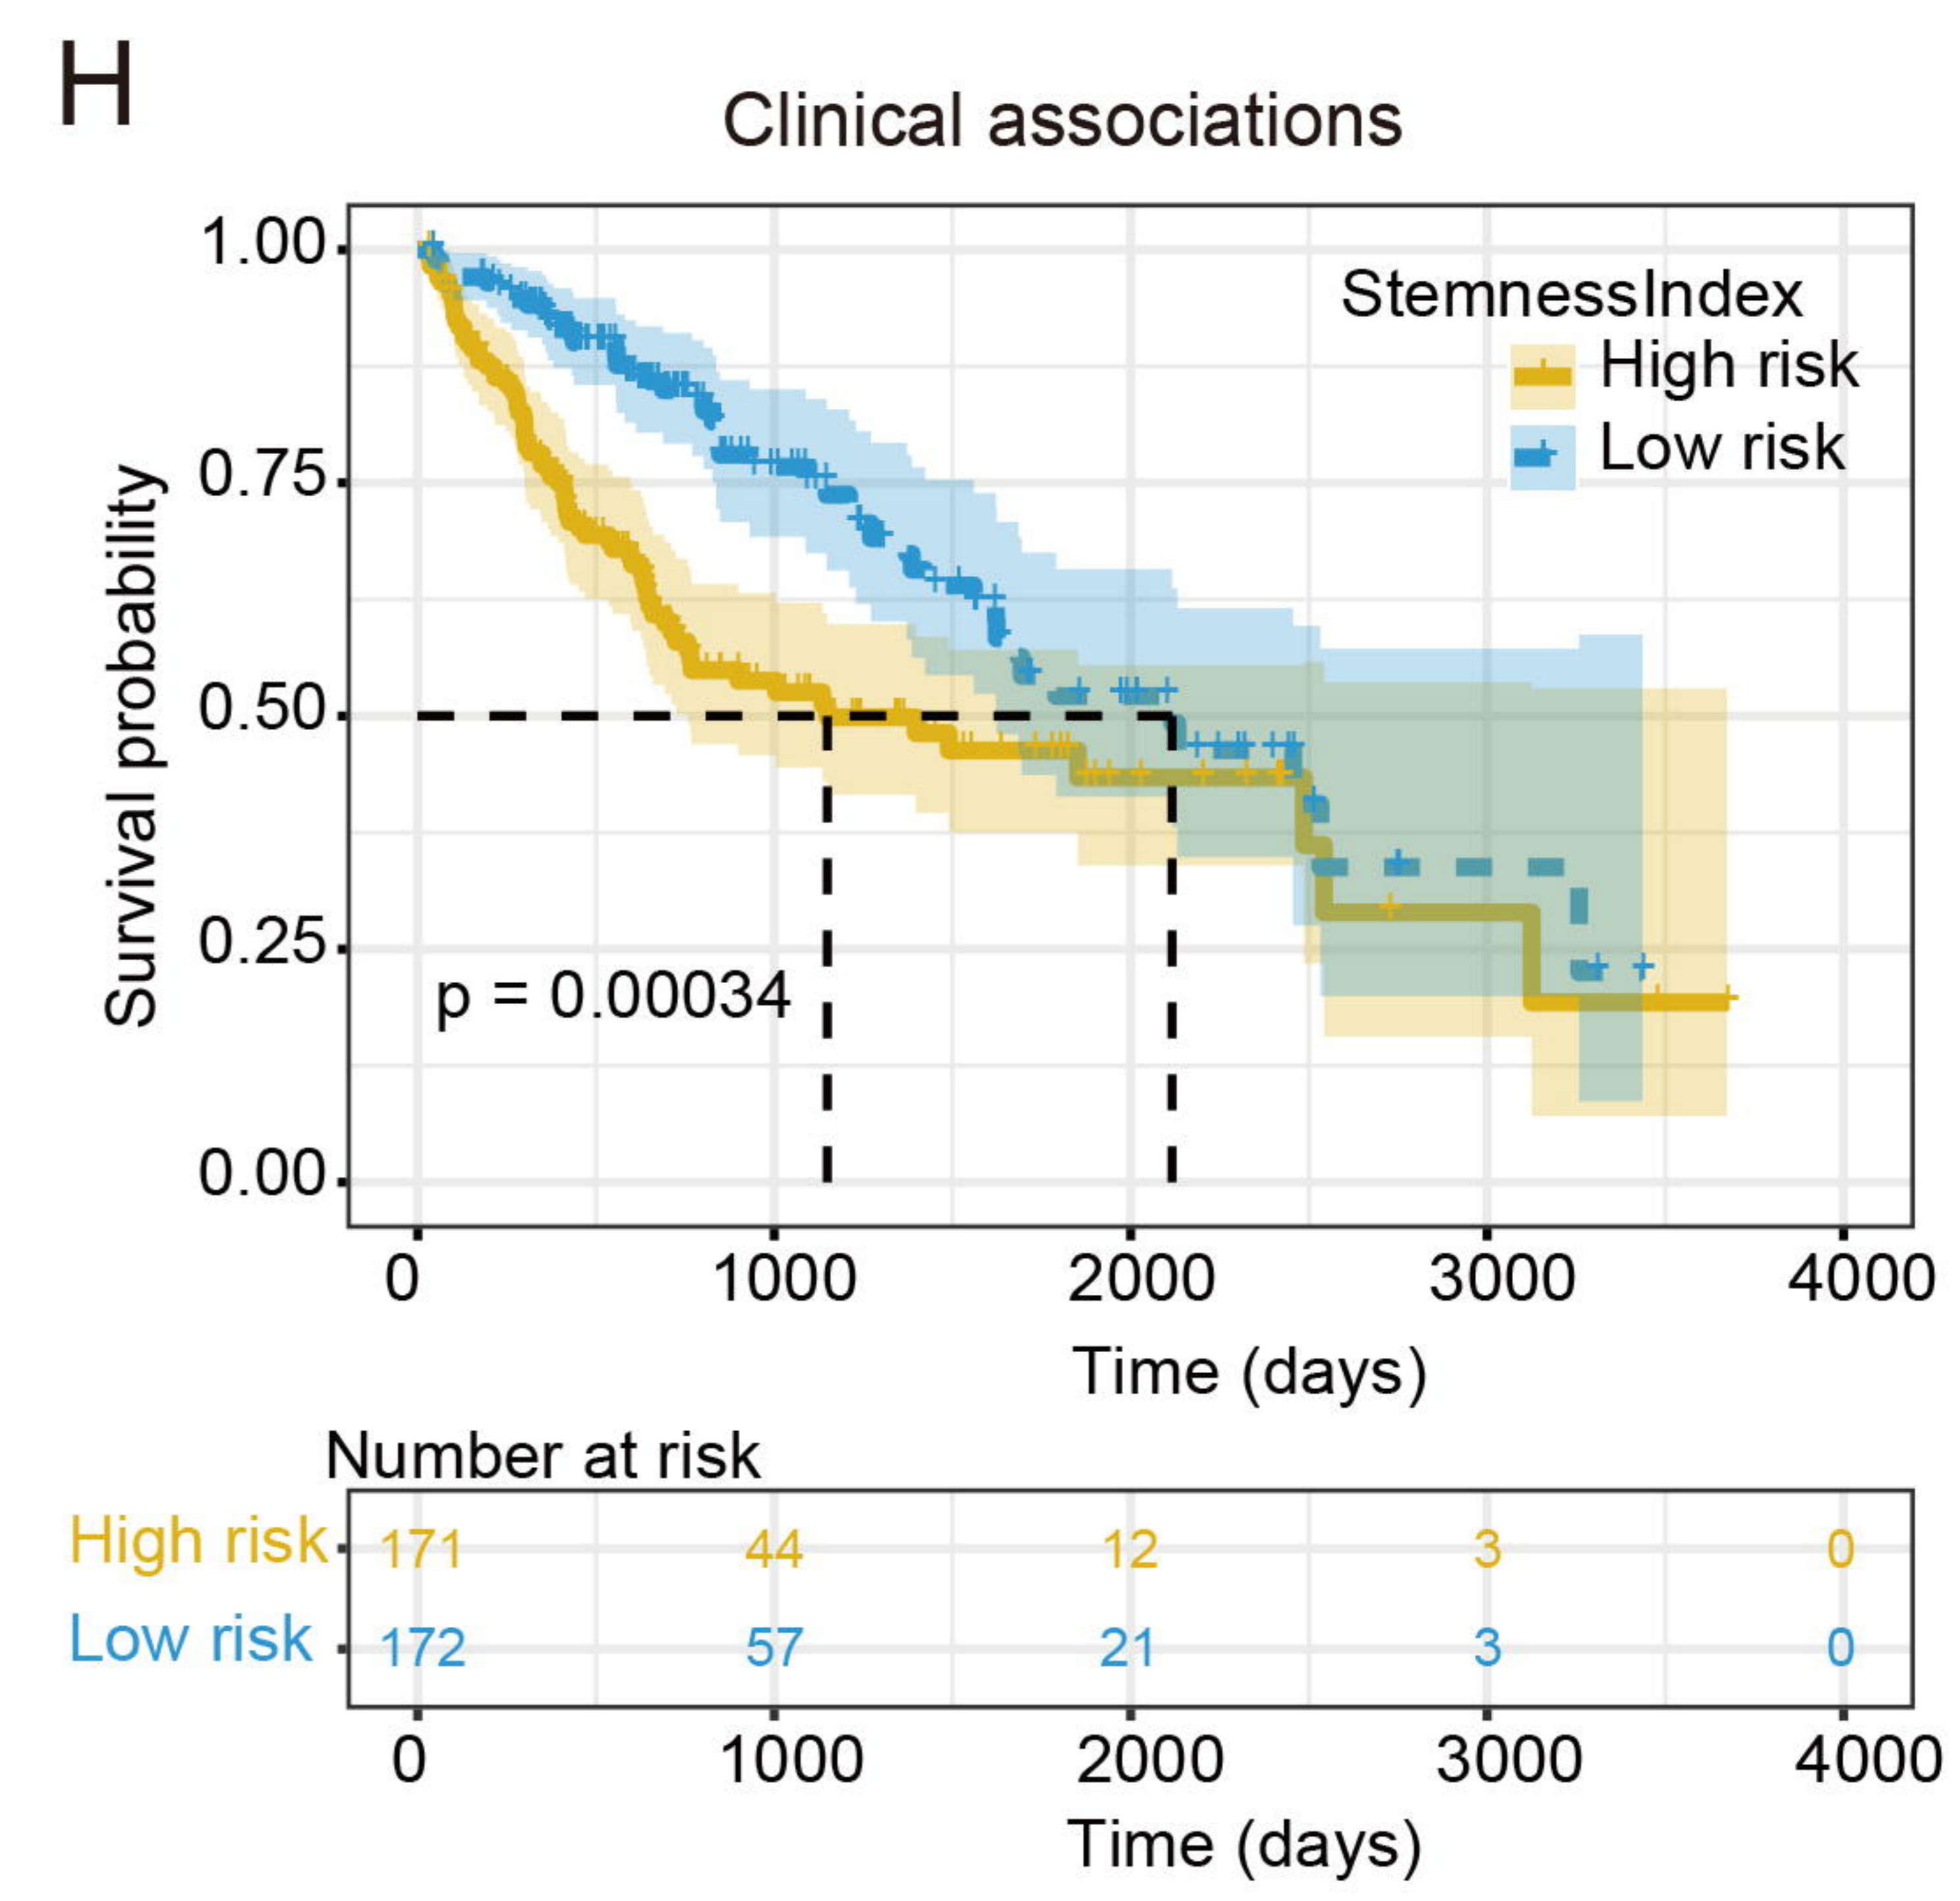

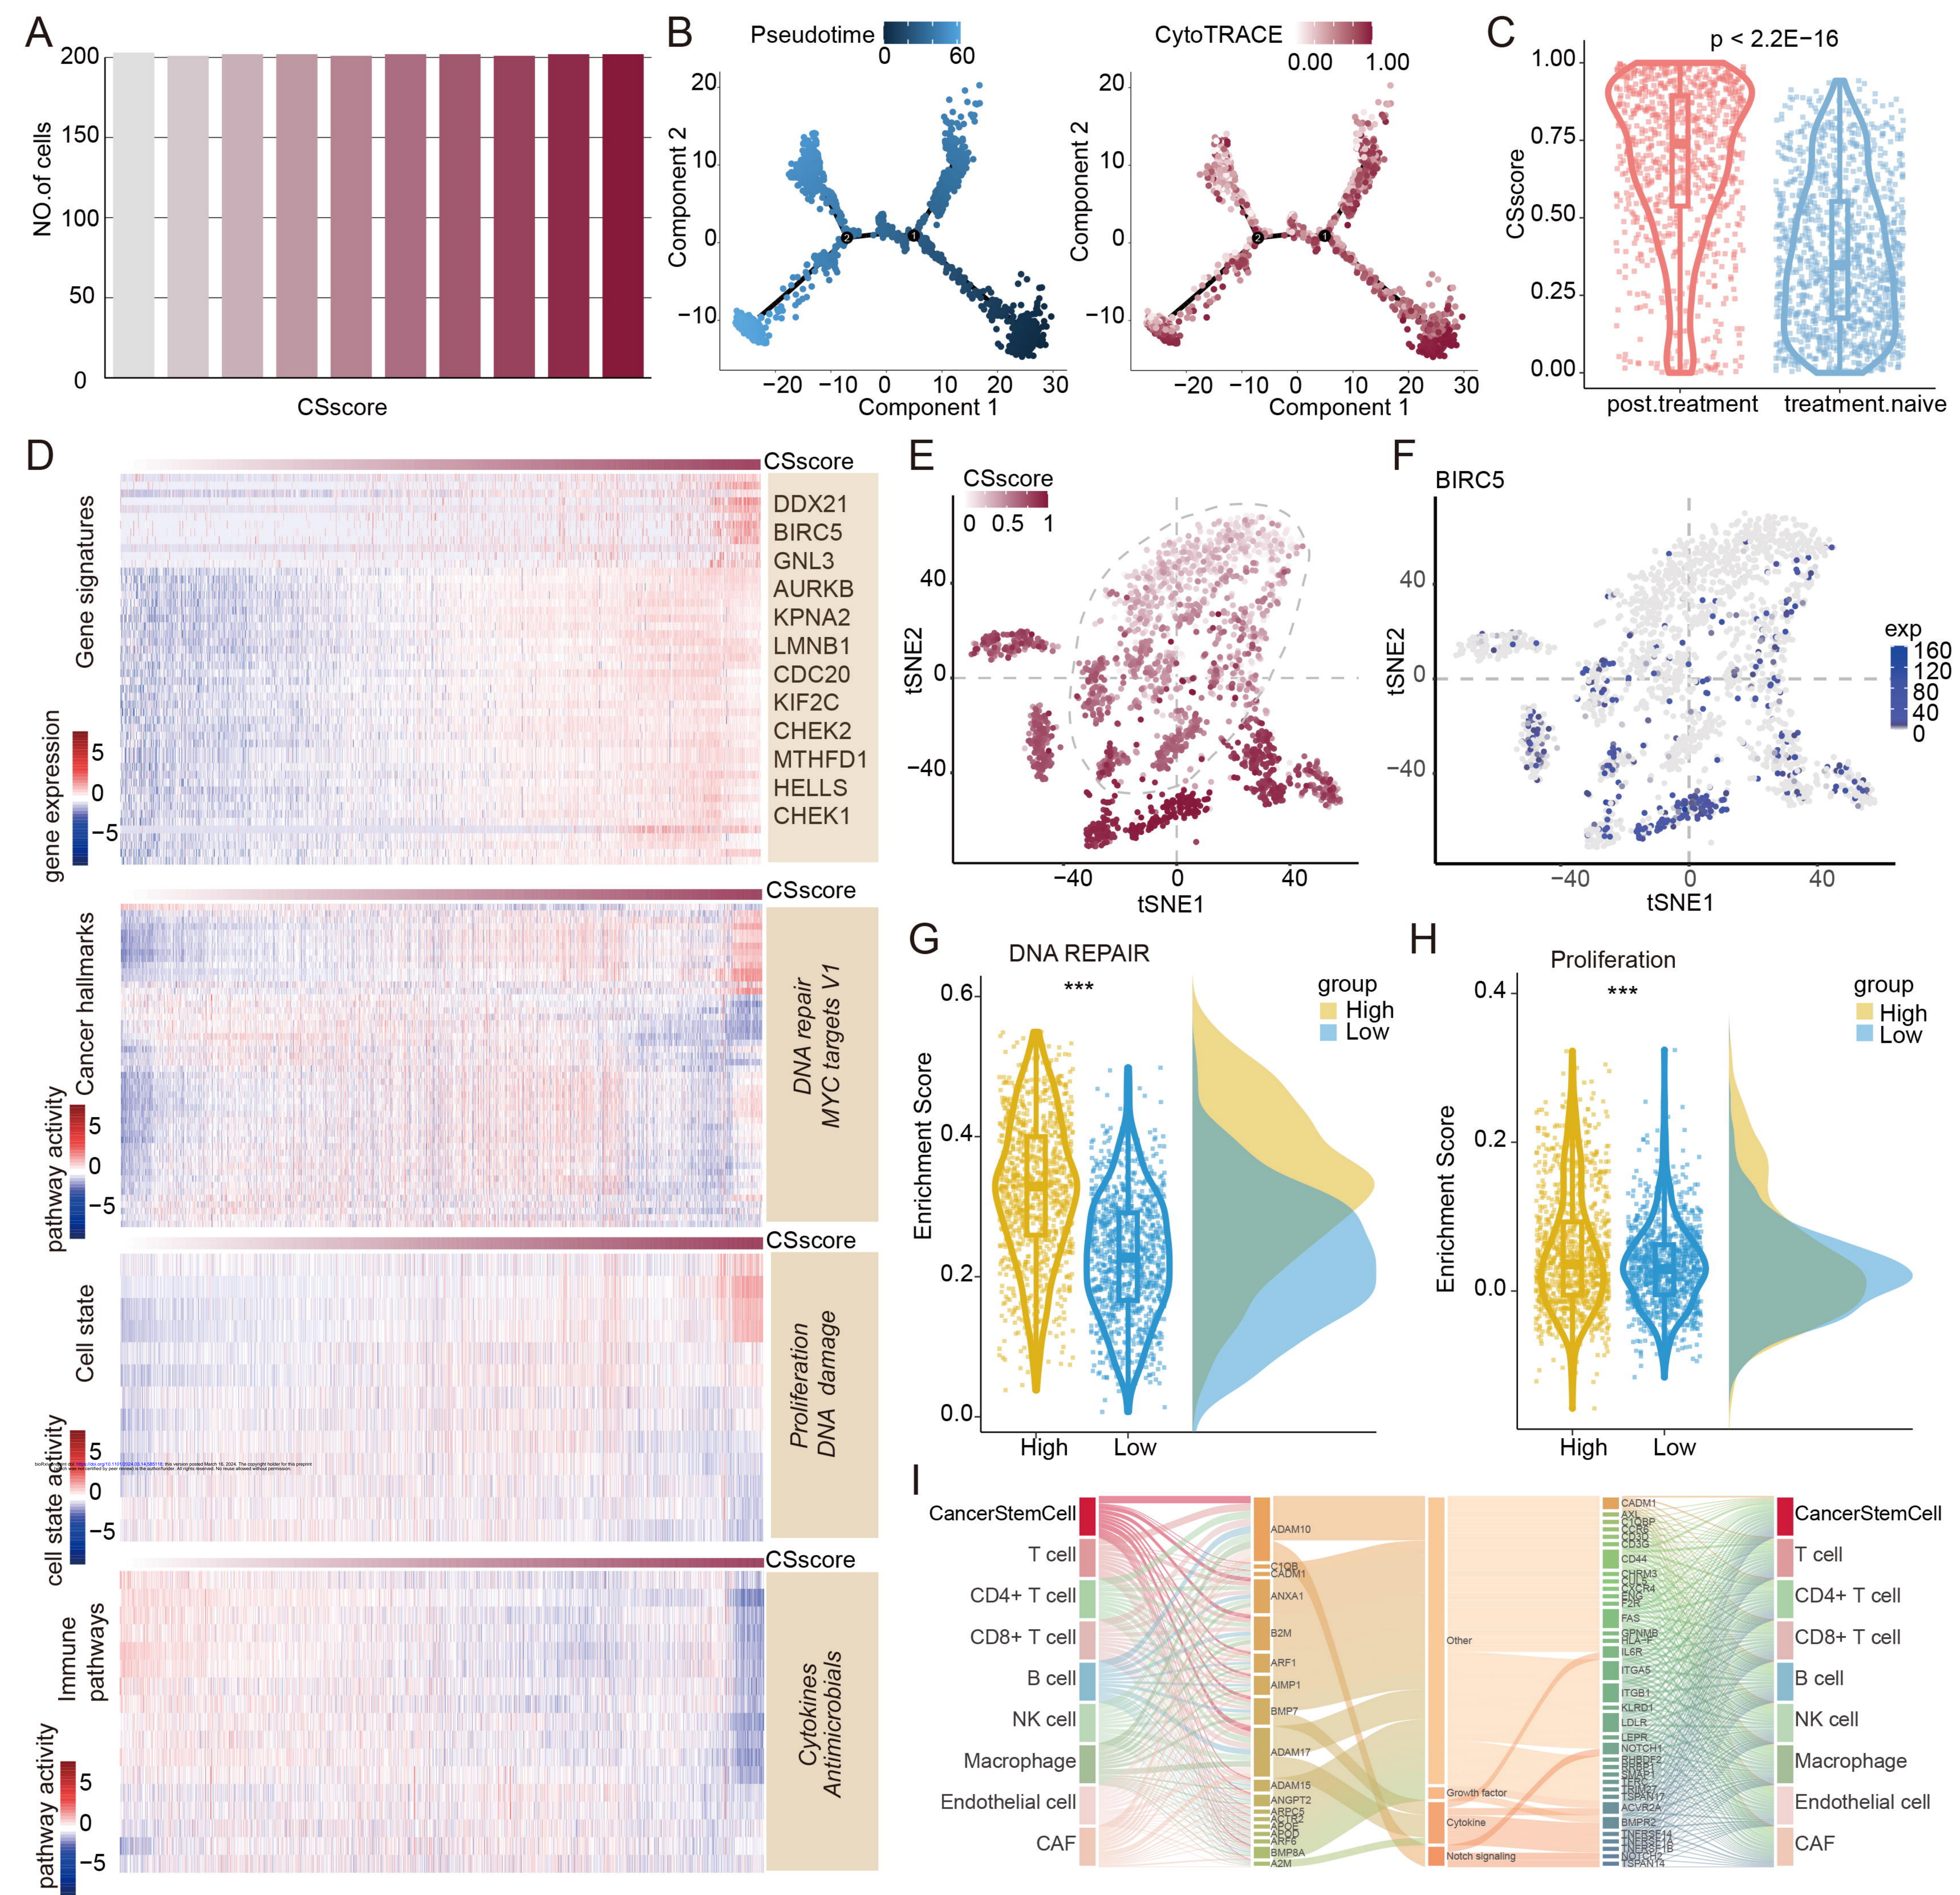

Source: https://www.biorxiv.org/content/biorxiv/early/2024/03/16/2024.03.14.585118.full.pdf
